# Supplementary material for: Solvent-Free, One-Pot, Multicomponent Synthesis of Xanthene Derivatives
Source: MDPI journal article supplement (doi:10.3390/catal13030561), 2023-03-10
Supplement: s1 [file s1]

1. FT-IR,  $^1\text{H}$ -NMR,  $^{13}\text{C}$ -NMR and MS spectra of selected products (4a-q)

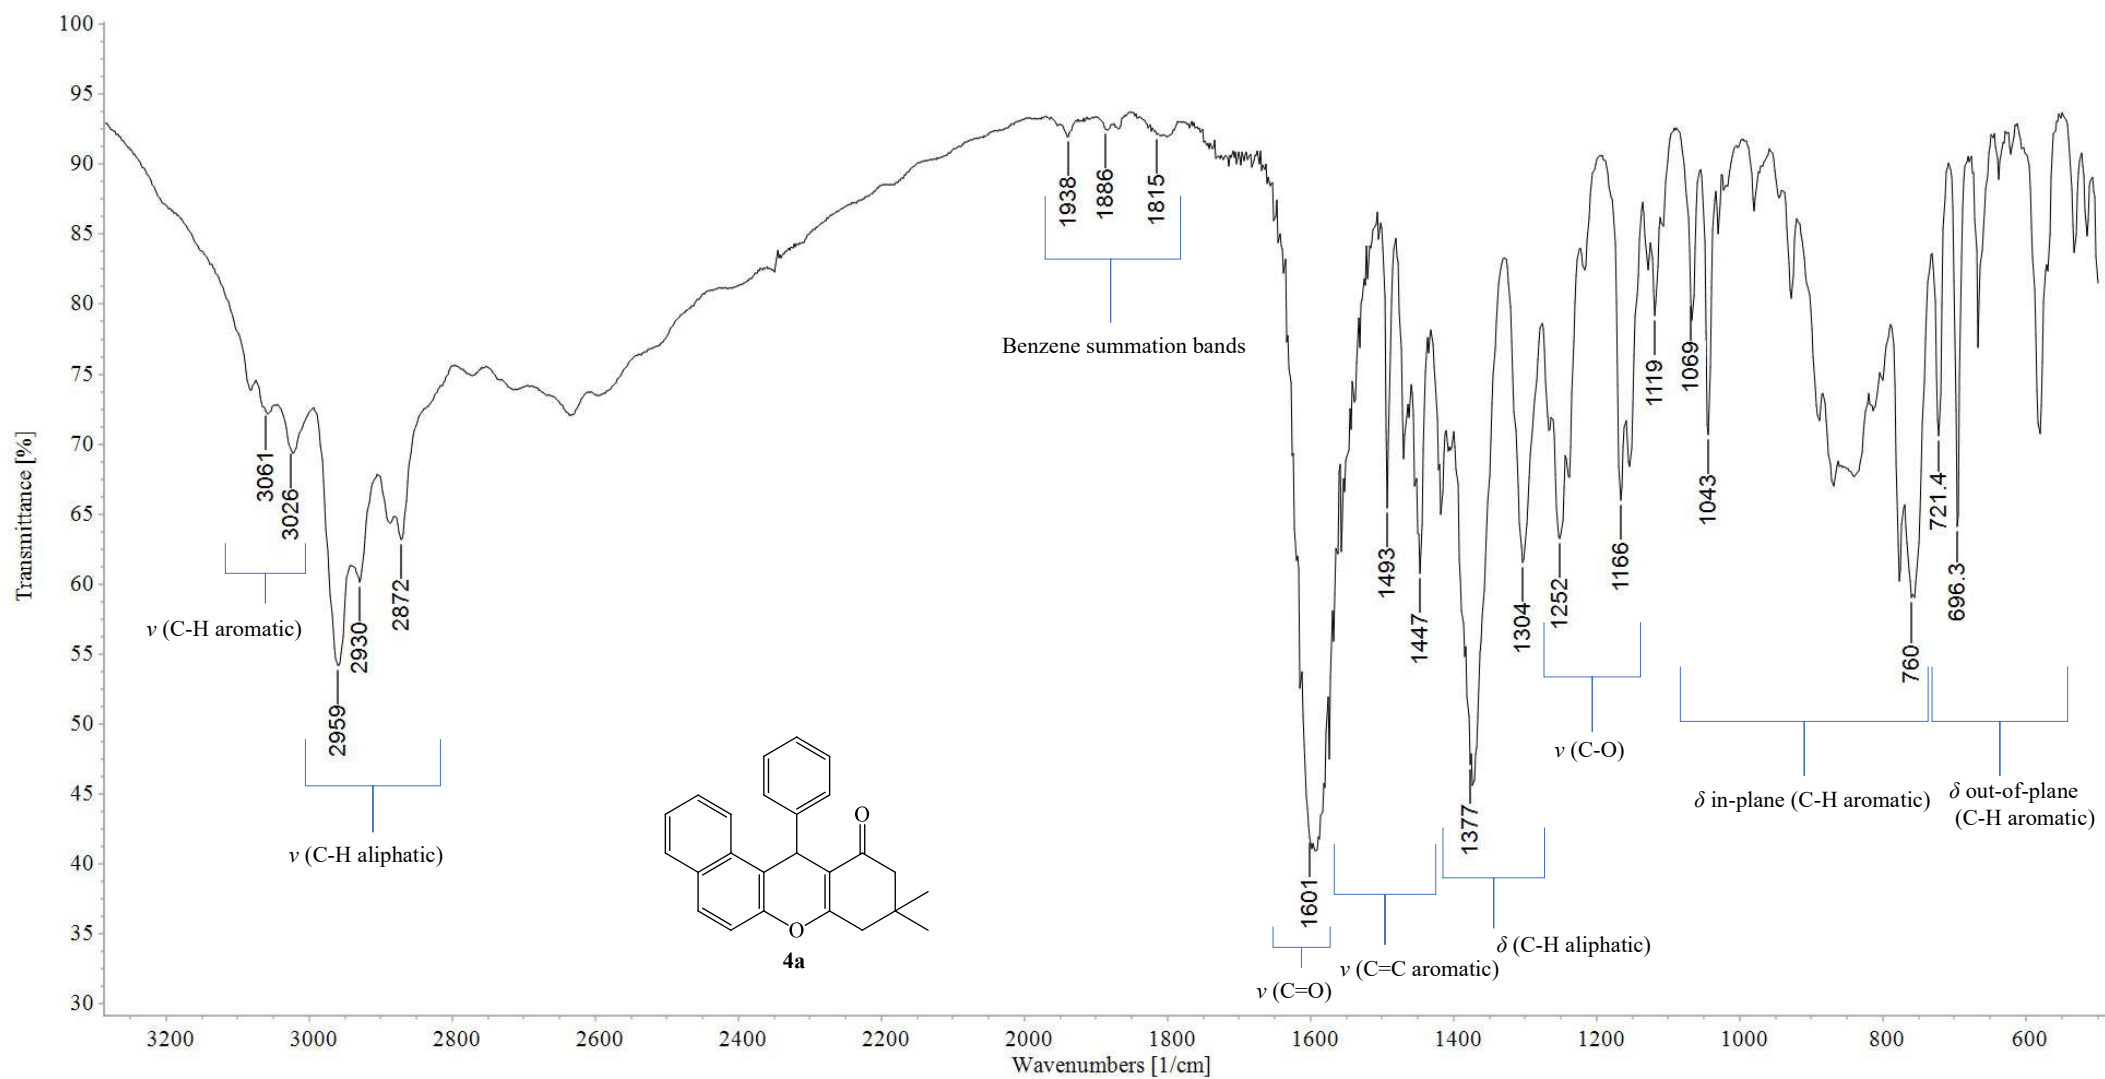

Figure S1 – FT-IR spectrum of 9,9-dimethyl-12-phenyl-8,9,10,12-tetrahydro-11H-benzo[a]xanthen-11-one (4a), NaCl

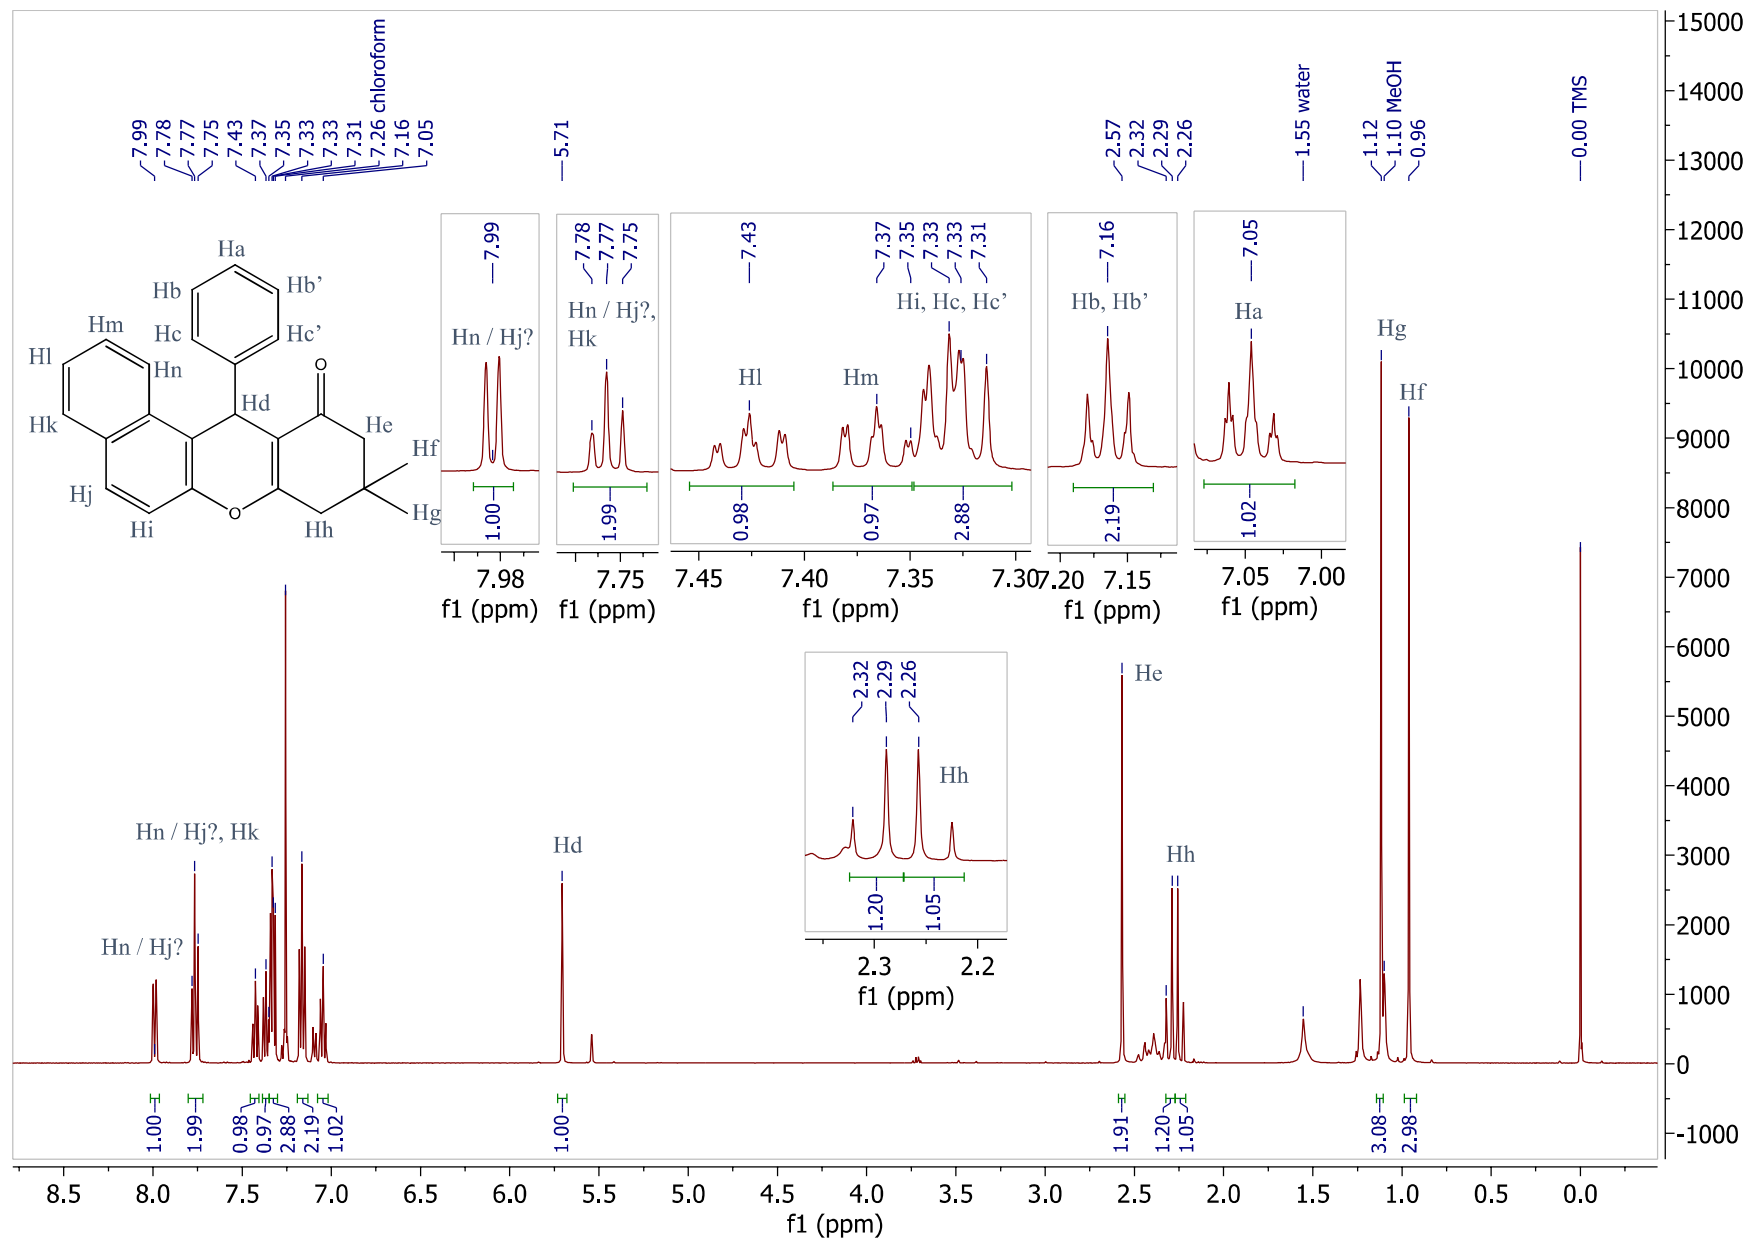

Figure S2 -  $^1\text{H}$ -NMR spectrum of 9,9-dimethyl-12-phenyl-8,9,10,12-tetrahydro-11H-benzo[a]xanthen-11-one (4a), in chloroform-d

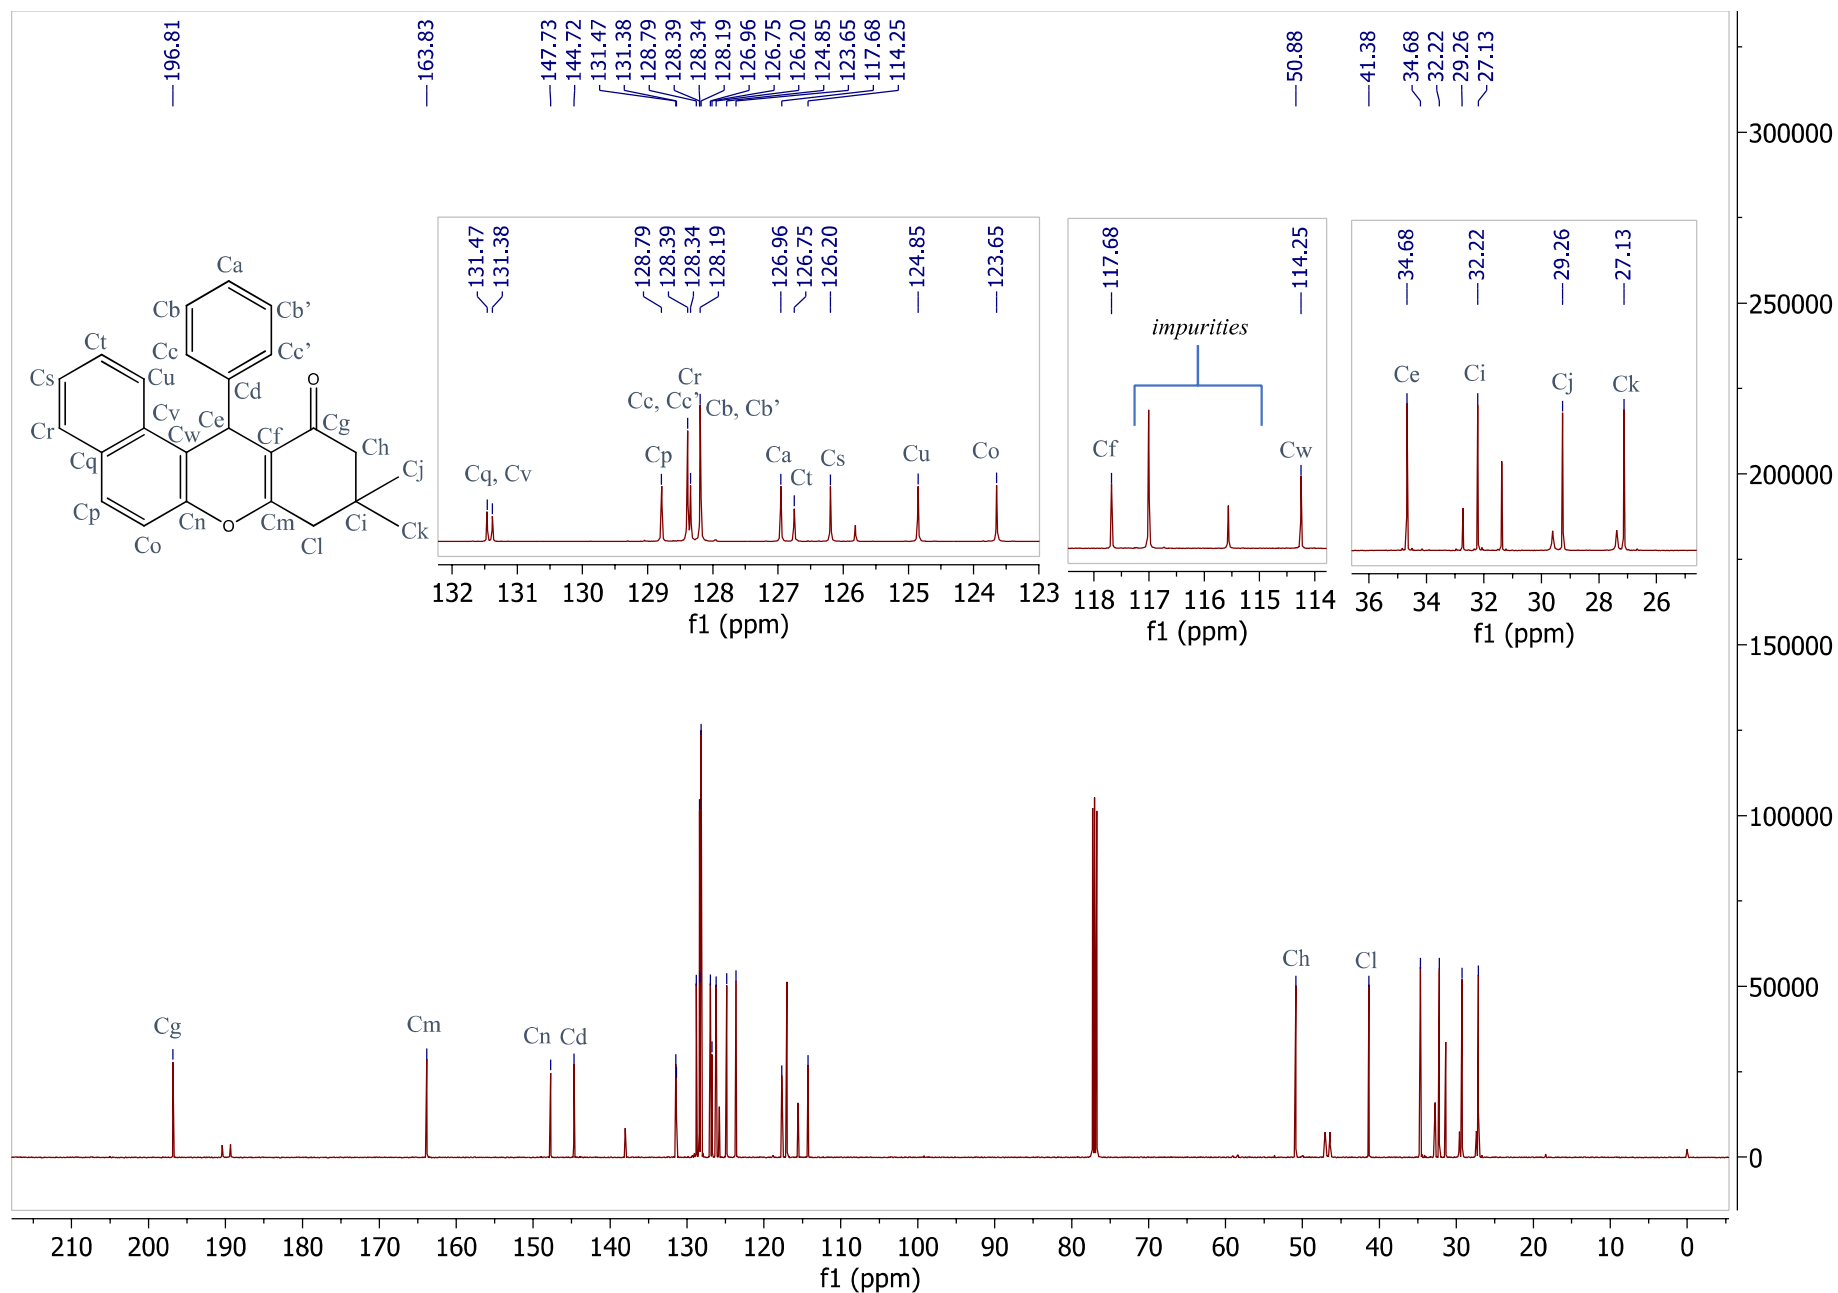

Figure S3 -  $^{13}\text{C}$ -NMR spectrum of 9,9-dimethyl-12-phenyl-8,9,10,12-tetrahydro-11H-benzo[a]xanthene-11-one (4a), in chloroform-d

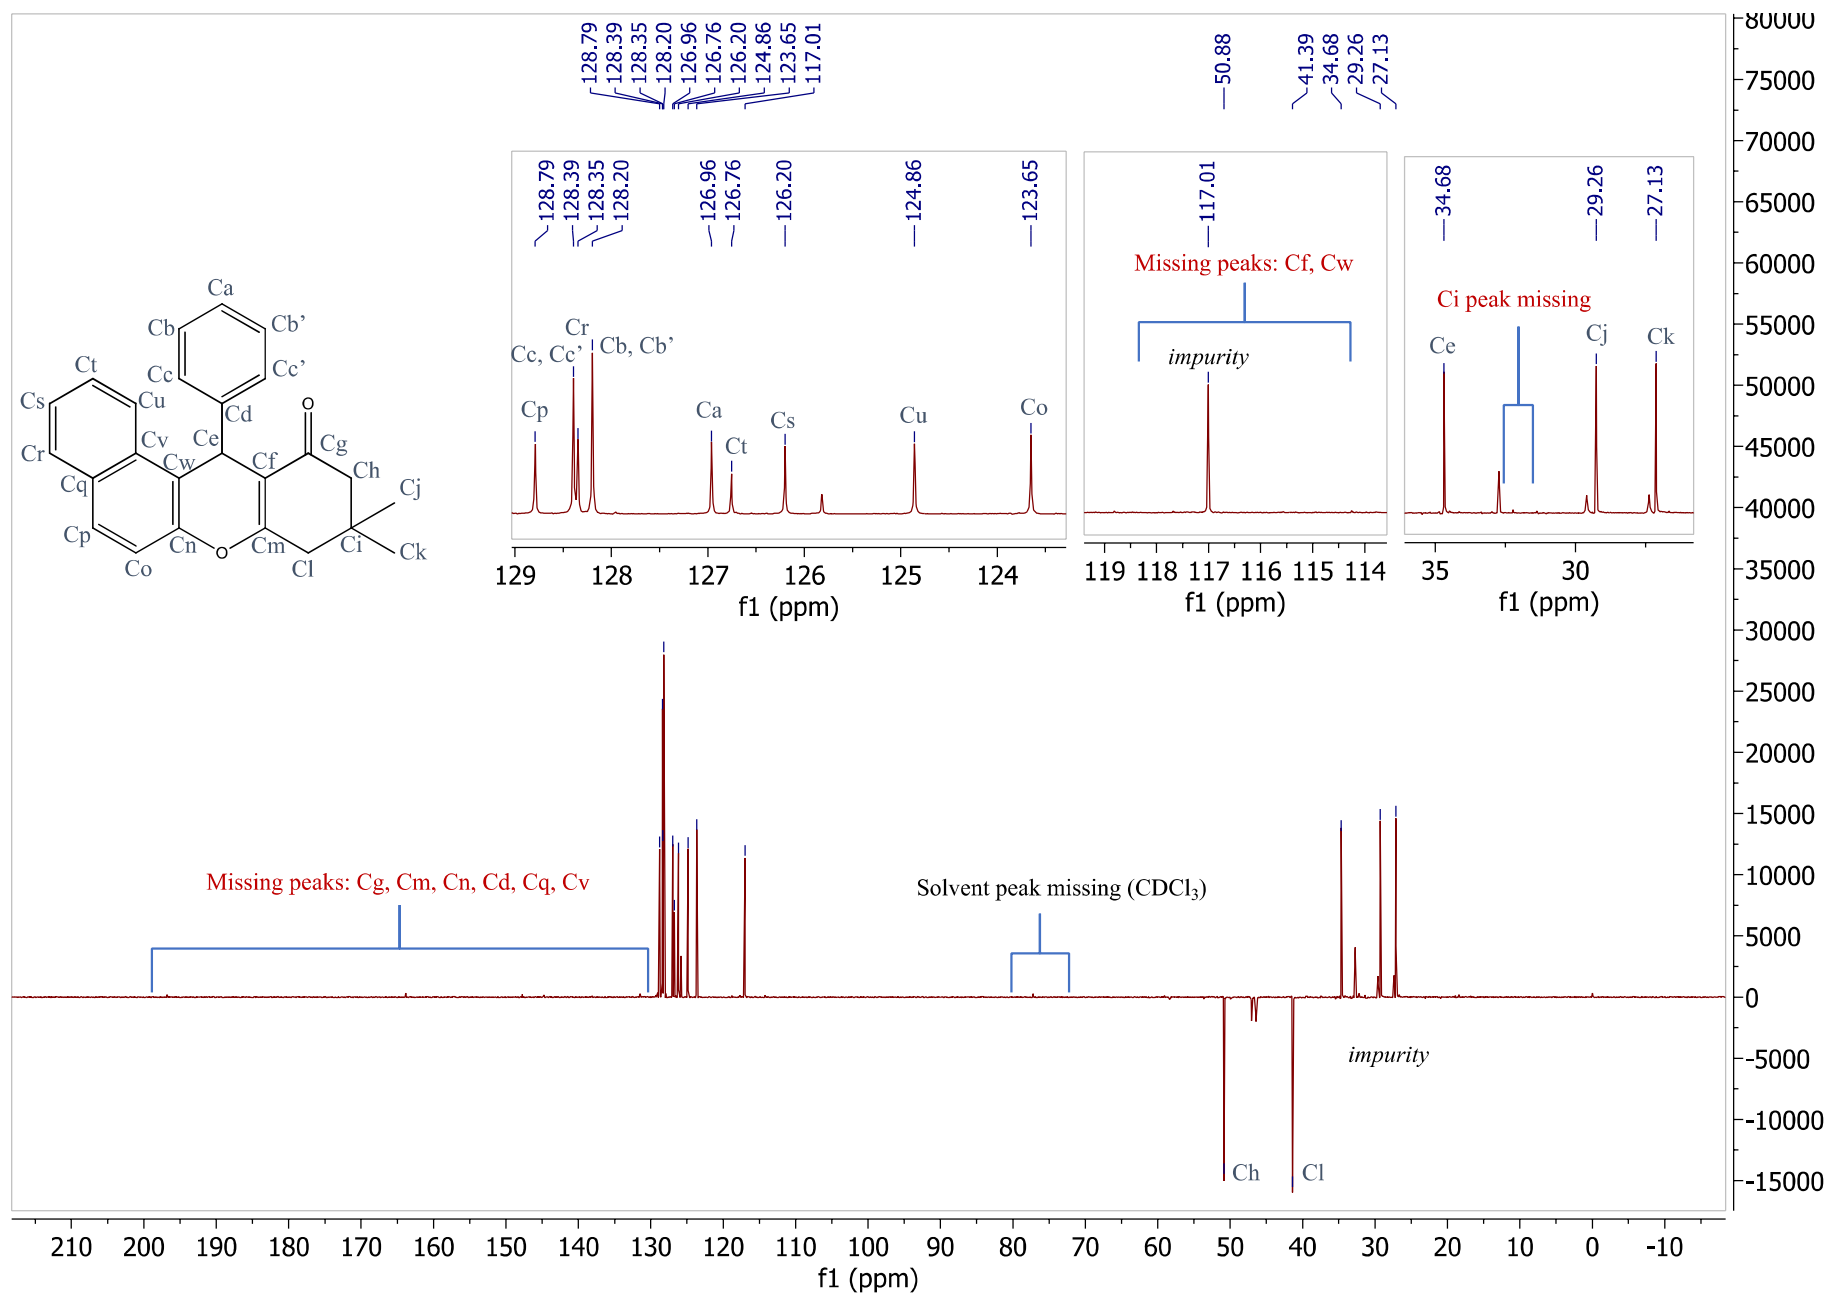

Figure S4 - DEPT spectrum of product 9,9-dimethyl-12-phenyl-8,9,10,12-tetrahydro-11H-benzo[a]xanthen-11-one (4a) in  $\text{CDCl}_3$ , showing missing peaks compared to  $^{13}\text{C}$ -NMR spectrum



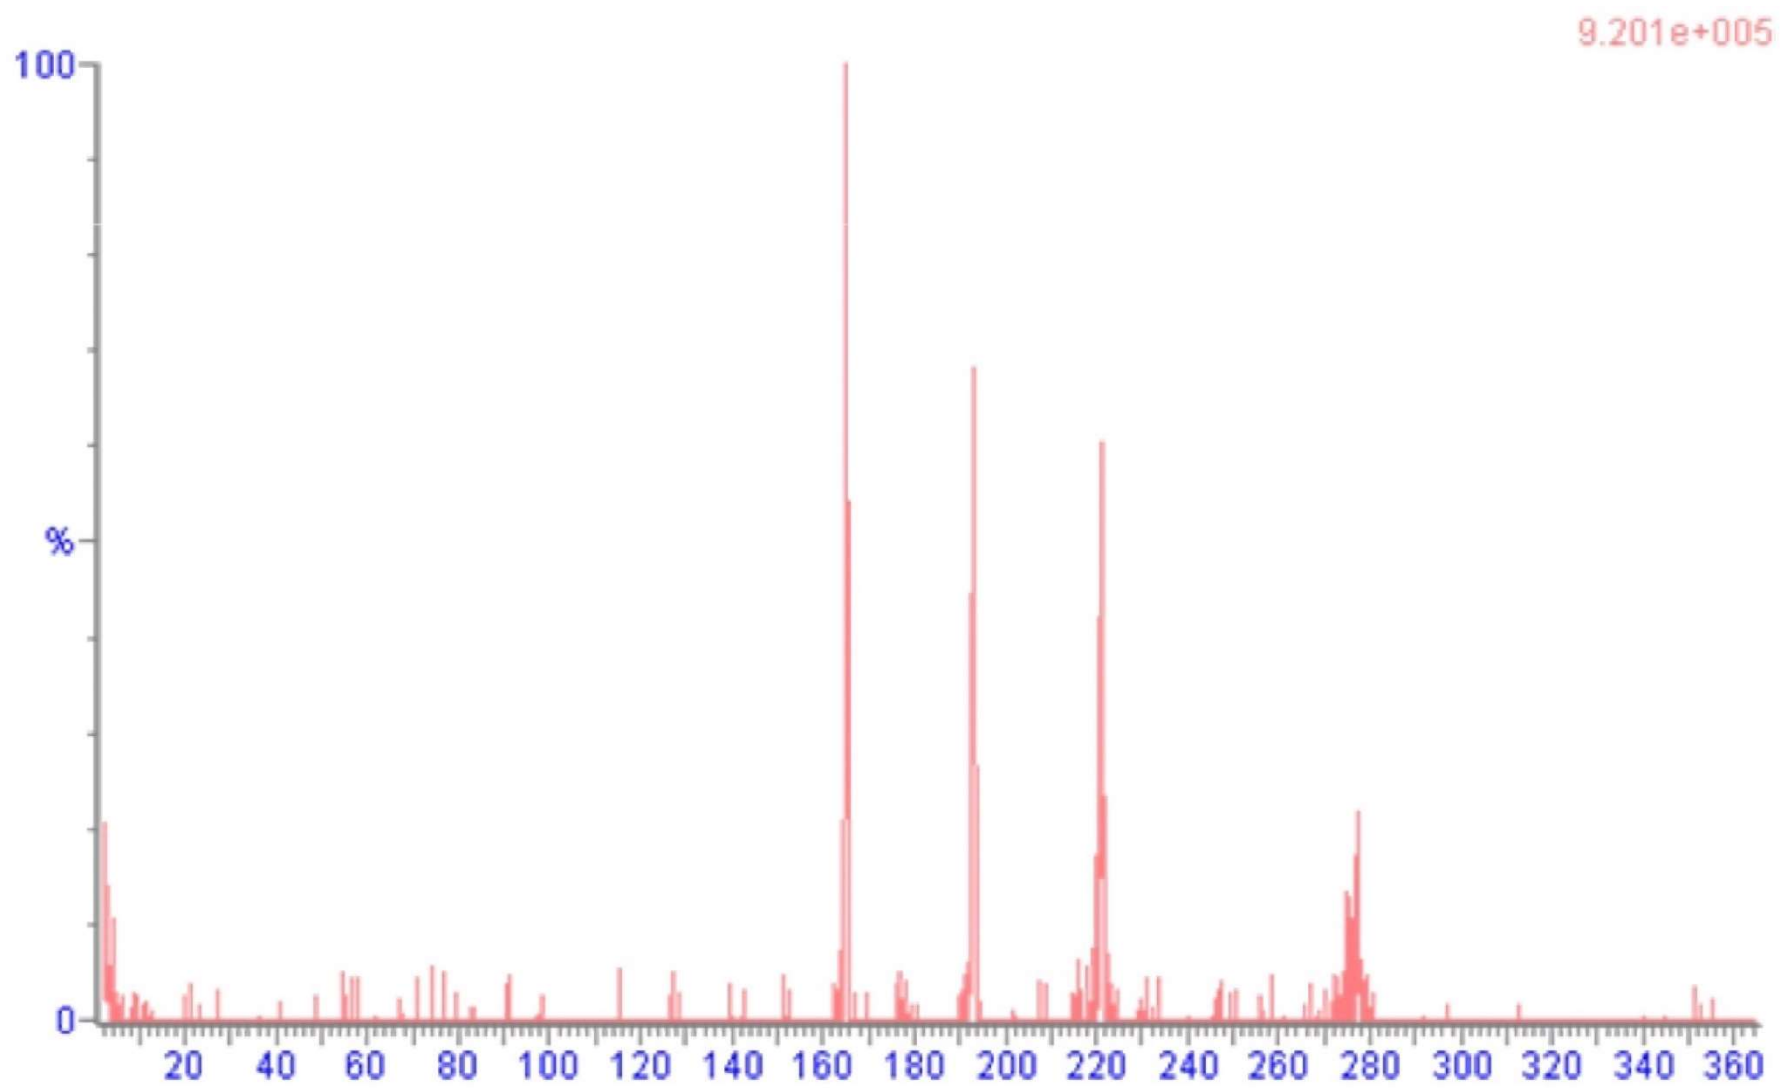

Figure S5 - MS (ES+) spectrum of 9,9-dimethyl-12-phenyl-8,9,10,12-tetrahydro-11H-benzo[a]xanthen-11-one (4a)

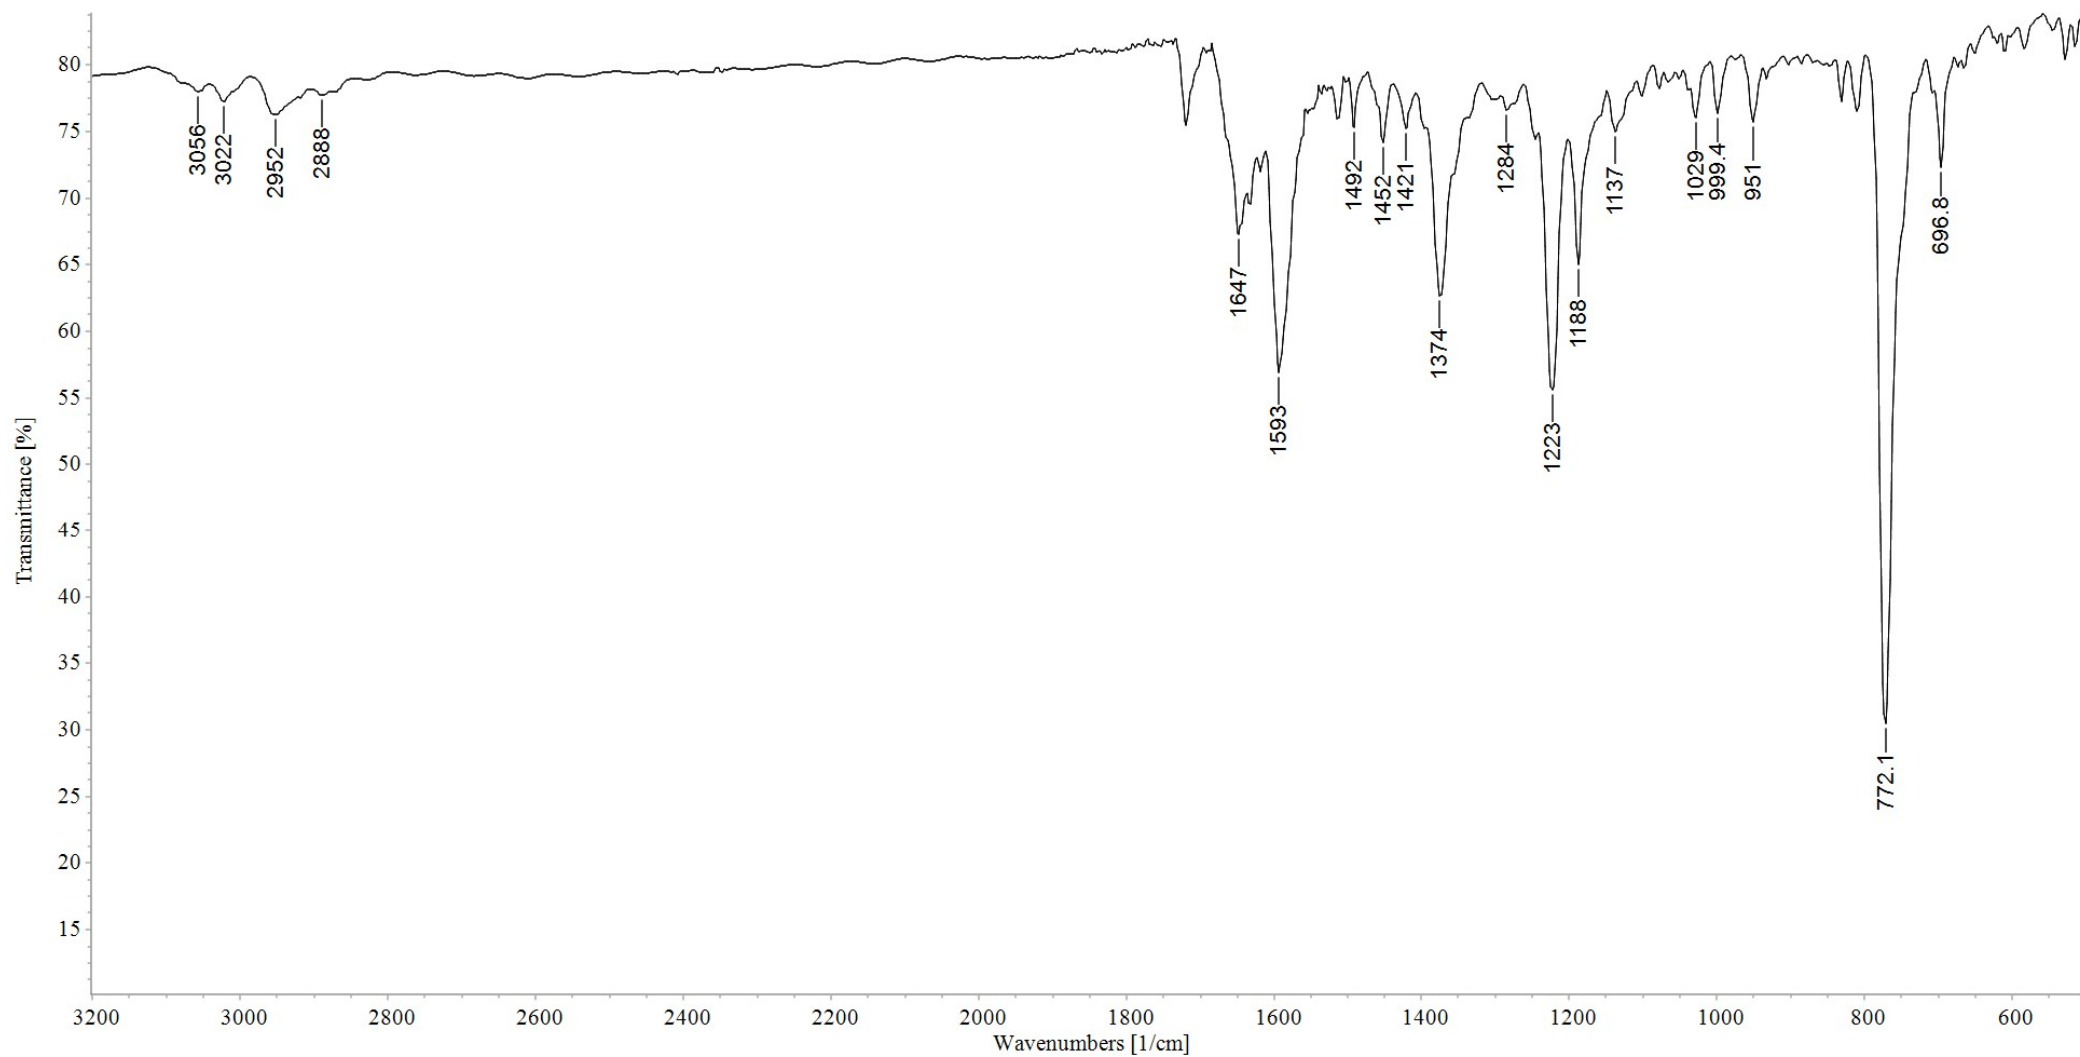

Figure S6 - FT-IR spectrum of 12-phenyl-9,10-dihydro-8H-benzo[a]xanthene-11(12H)-one (4b), NaCl

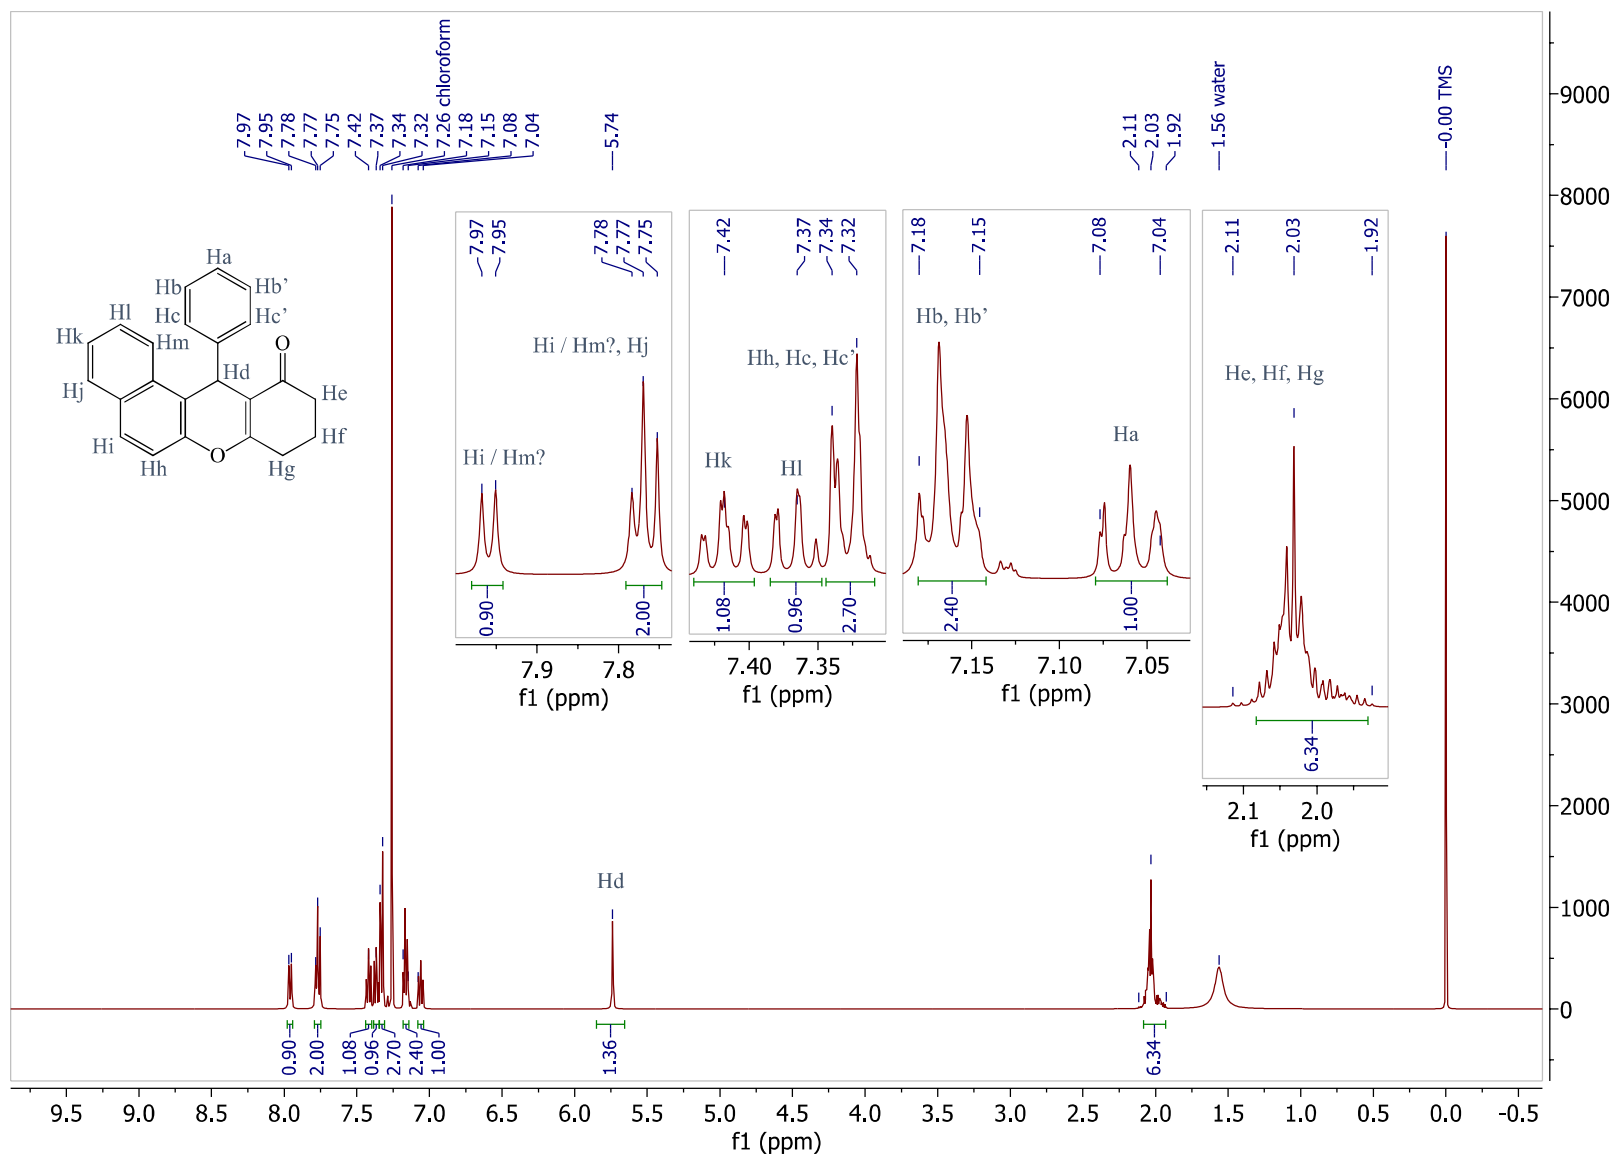

Figure S7 - <sup>1</sup>H-NMR spectrum of 12-phenyl-8,9,10,12-tetrahydrobenzo[a]xanthene-11-one (4b), in chloroform-d

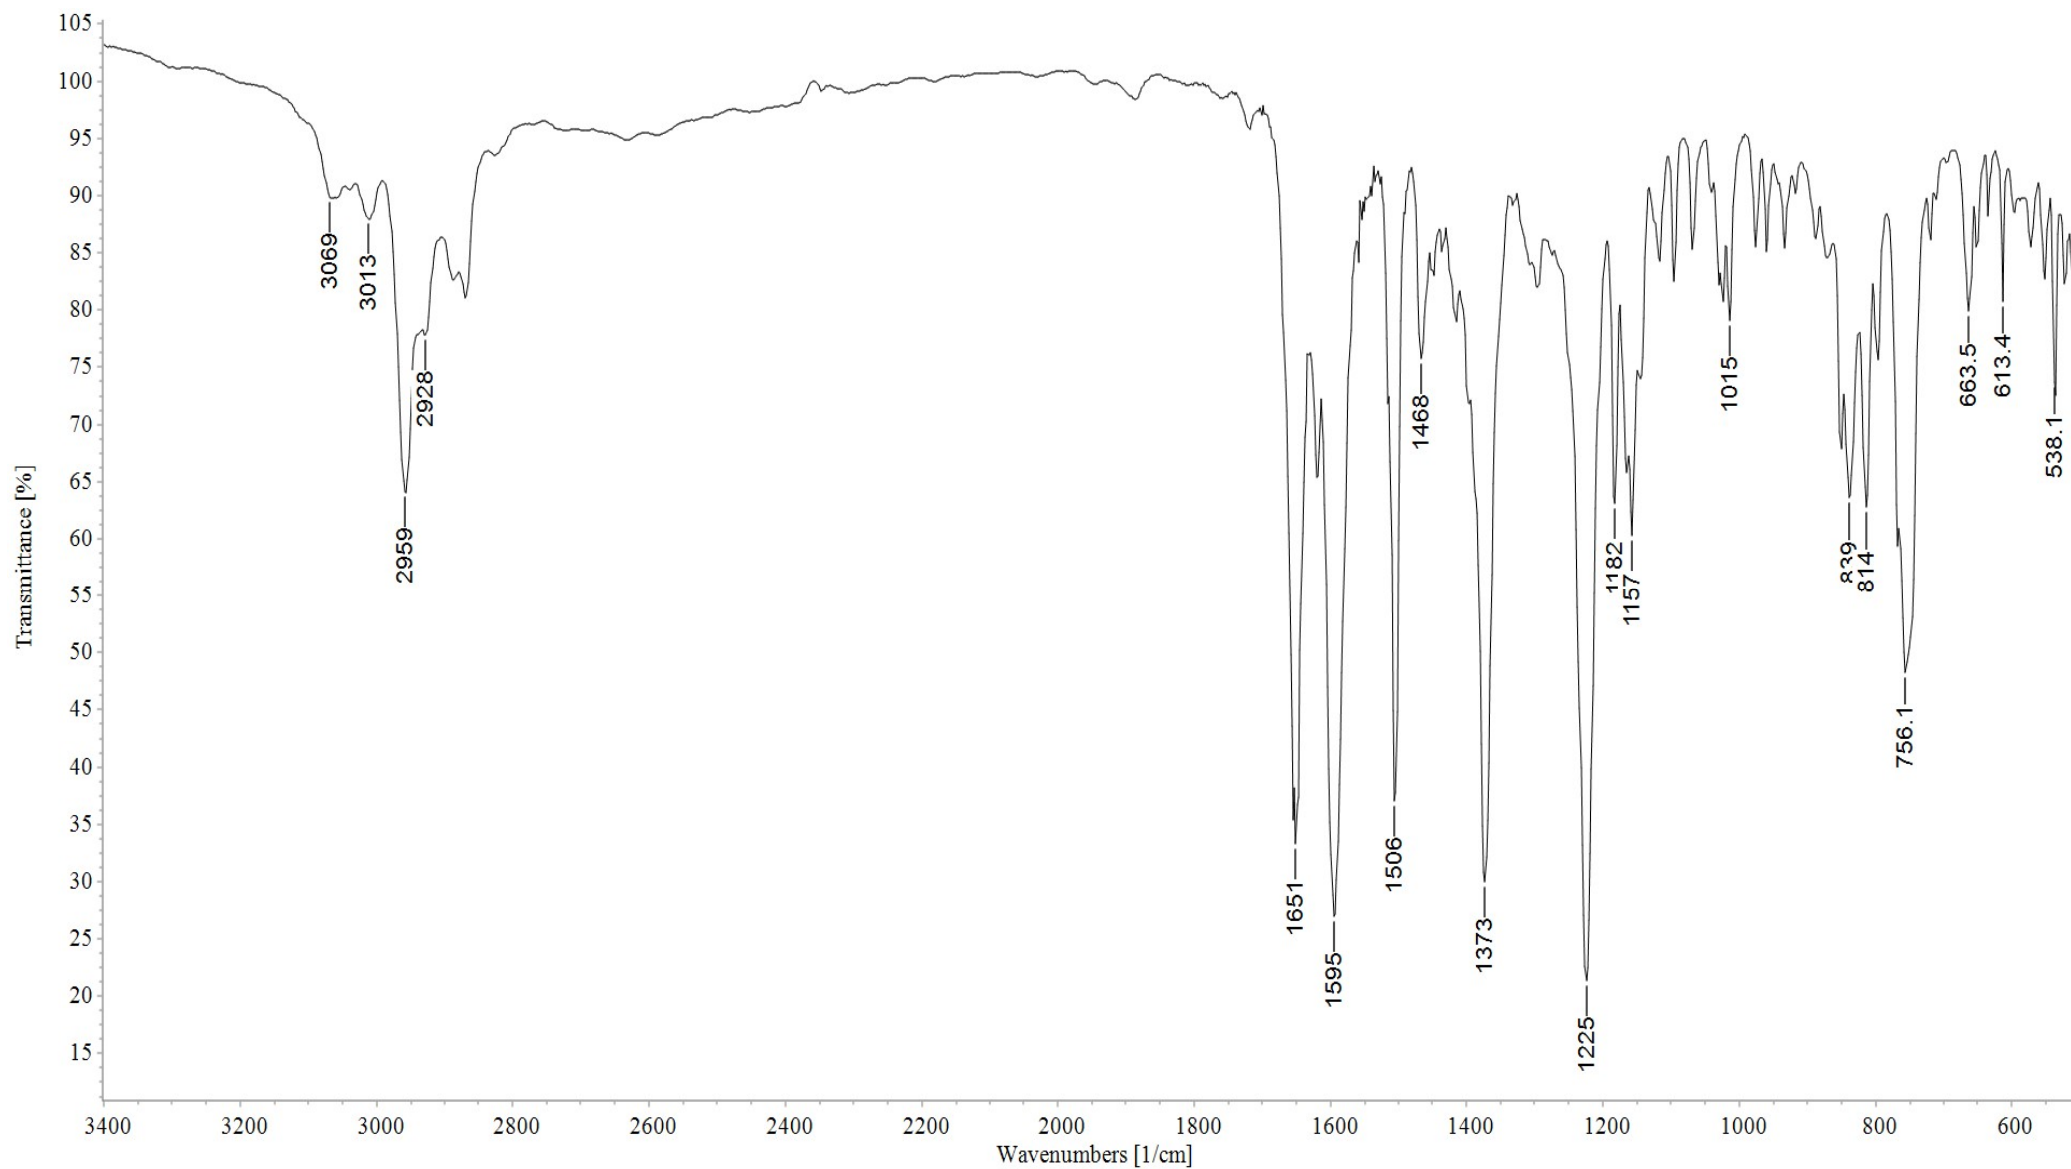

Figure S8 - FT-IR spectrum of 9,9-dimethyl-12-(4-fluorophenyl)-8,9,10,12-tetrahydro-11H-benzo[a]xanthen-11-one (4c), NaCl

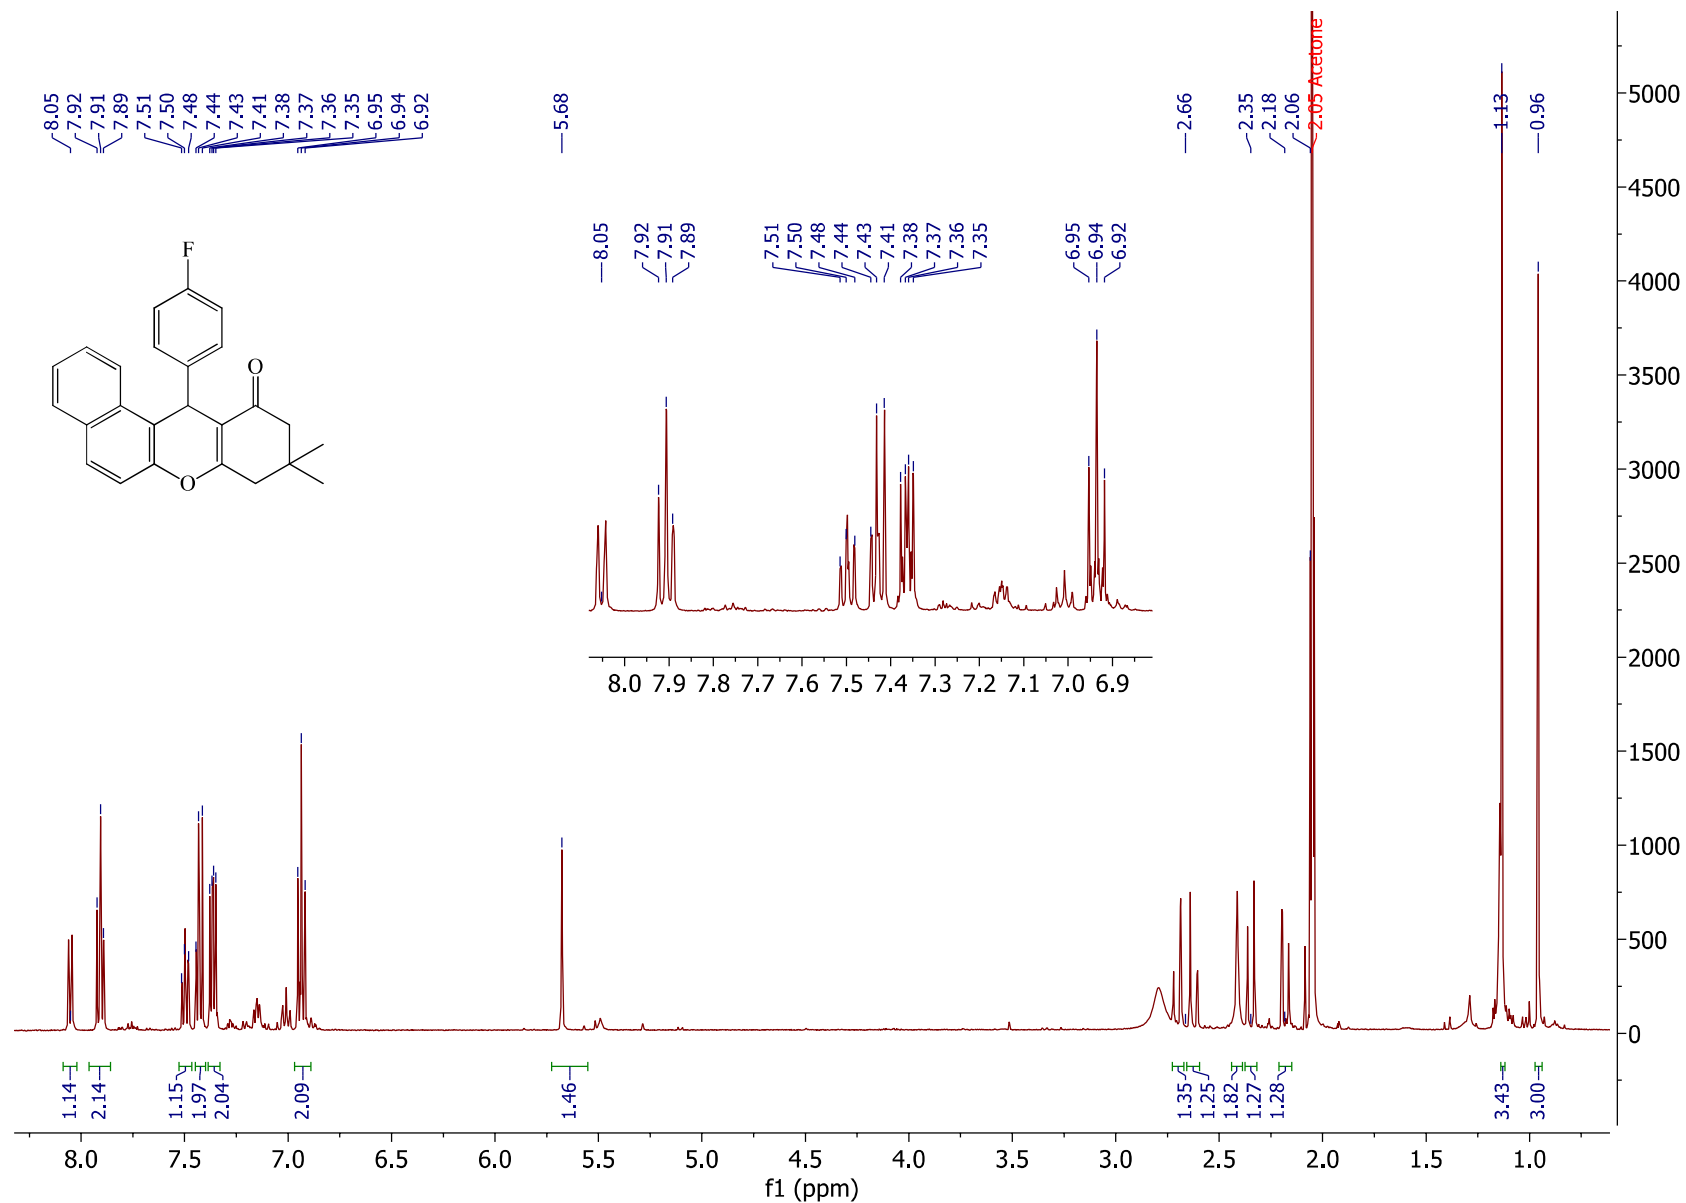

Figure S9 - <sup>1</sup>H-NMR spectrum of 9,9-dimethyl-12-(4-fluorophenyl)-9,10-dihydro-8H-benzo[a]xanthen-11(12H)-one (4c), in acetone-d<sub>6</sub>

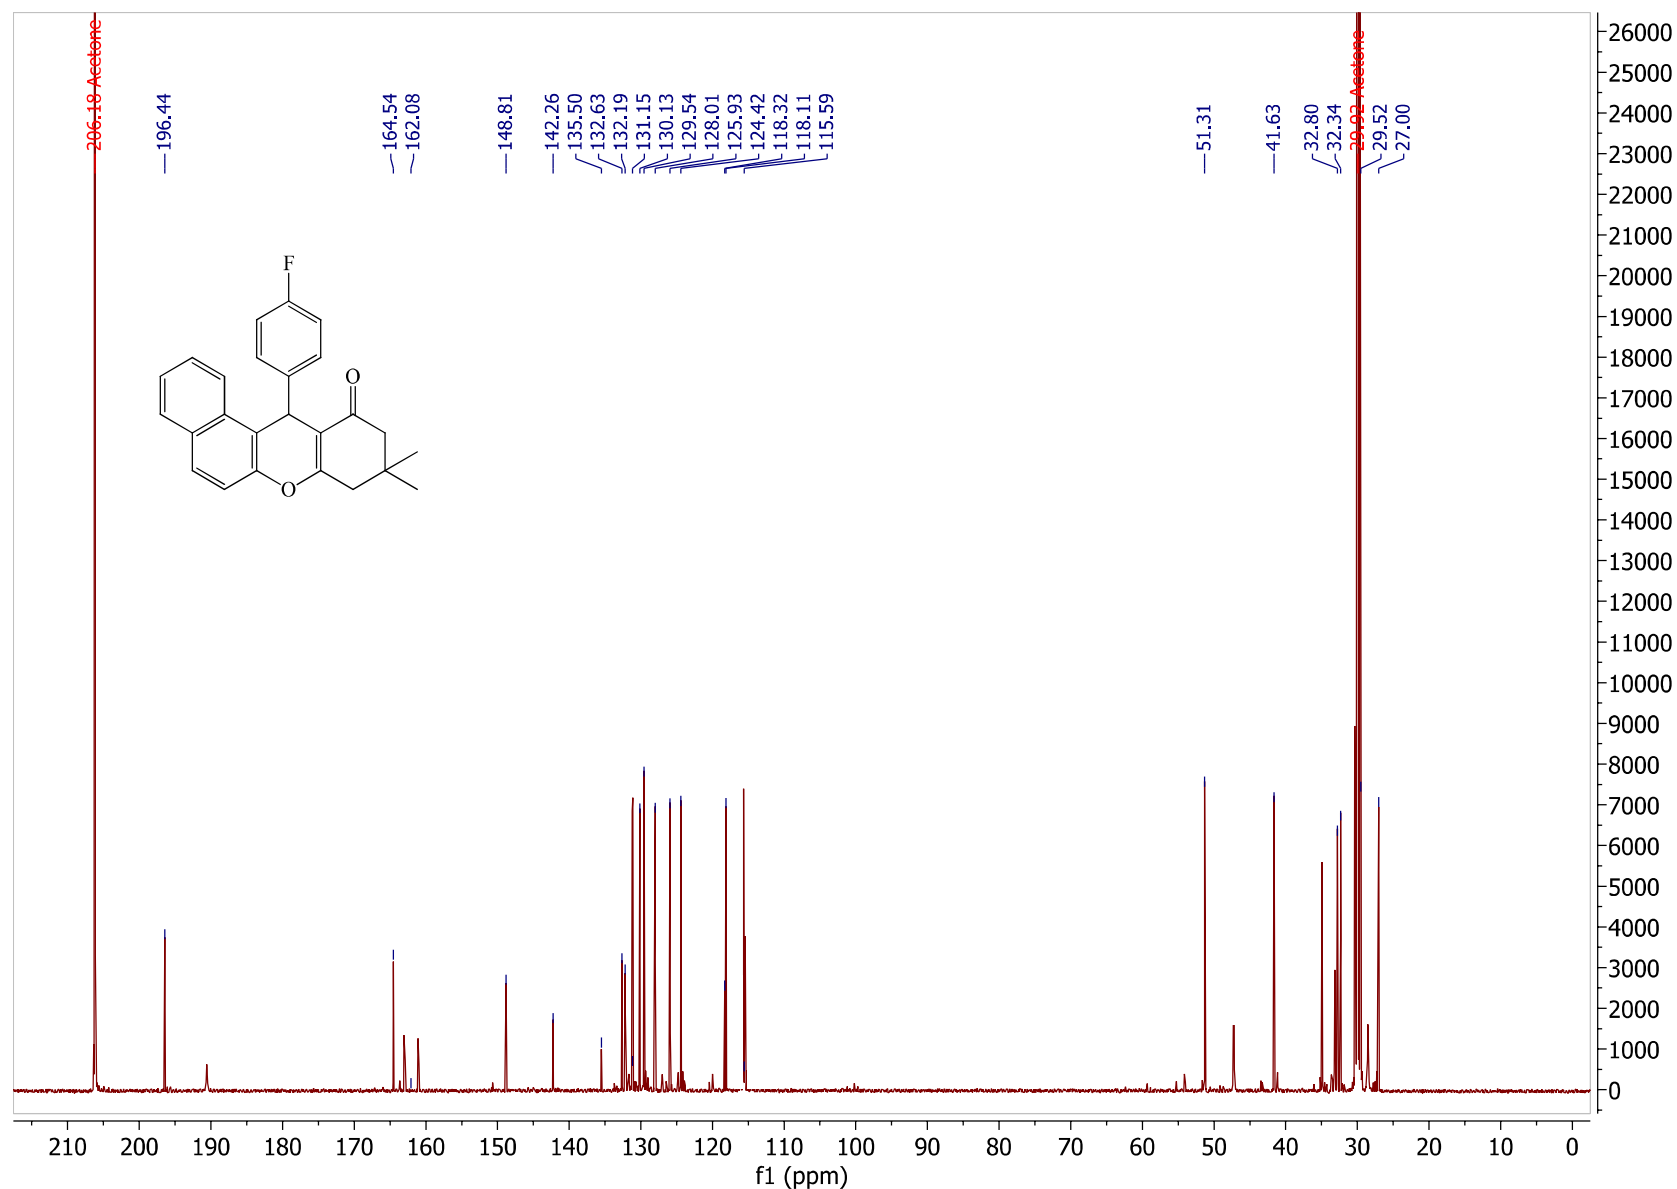

Figure S10 - <sup>13</sup>C-NMR spectrum of 9,9-dimethyl-12-(4-fluorophenyl)-8,9,10,12-tetrahydrobenzo[a]xanthen-11-one (4c), in acetone-d<sub>6</sub>

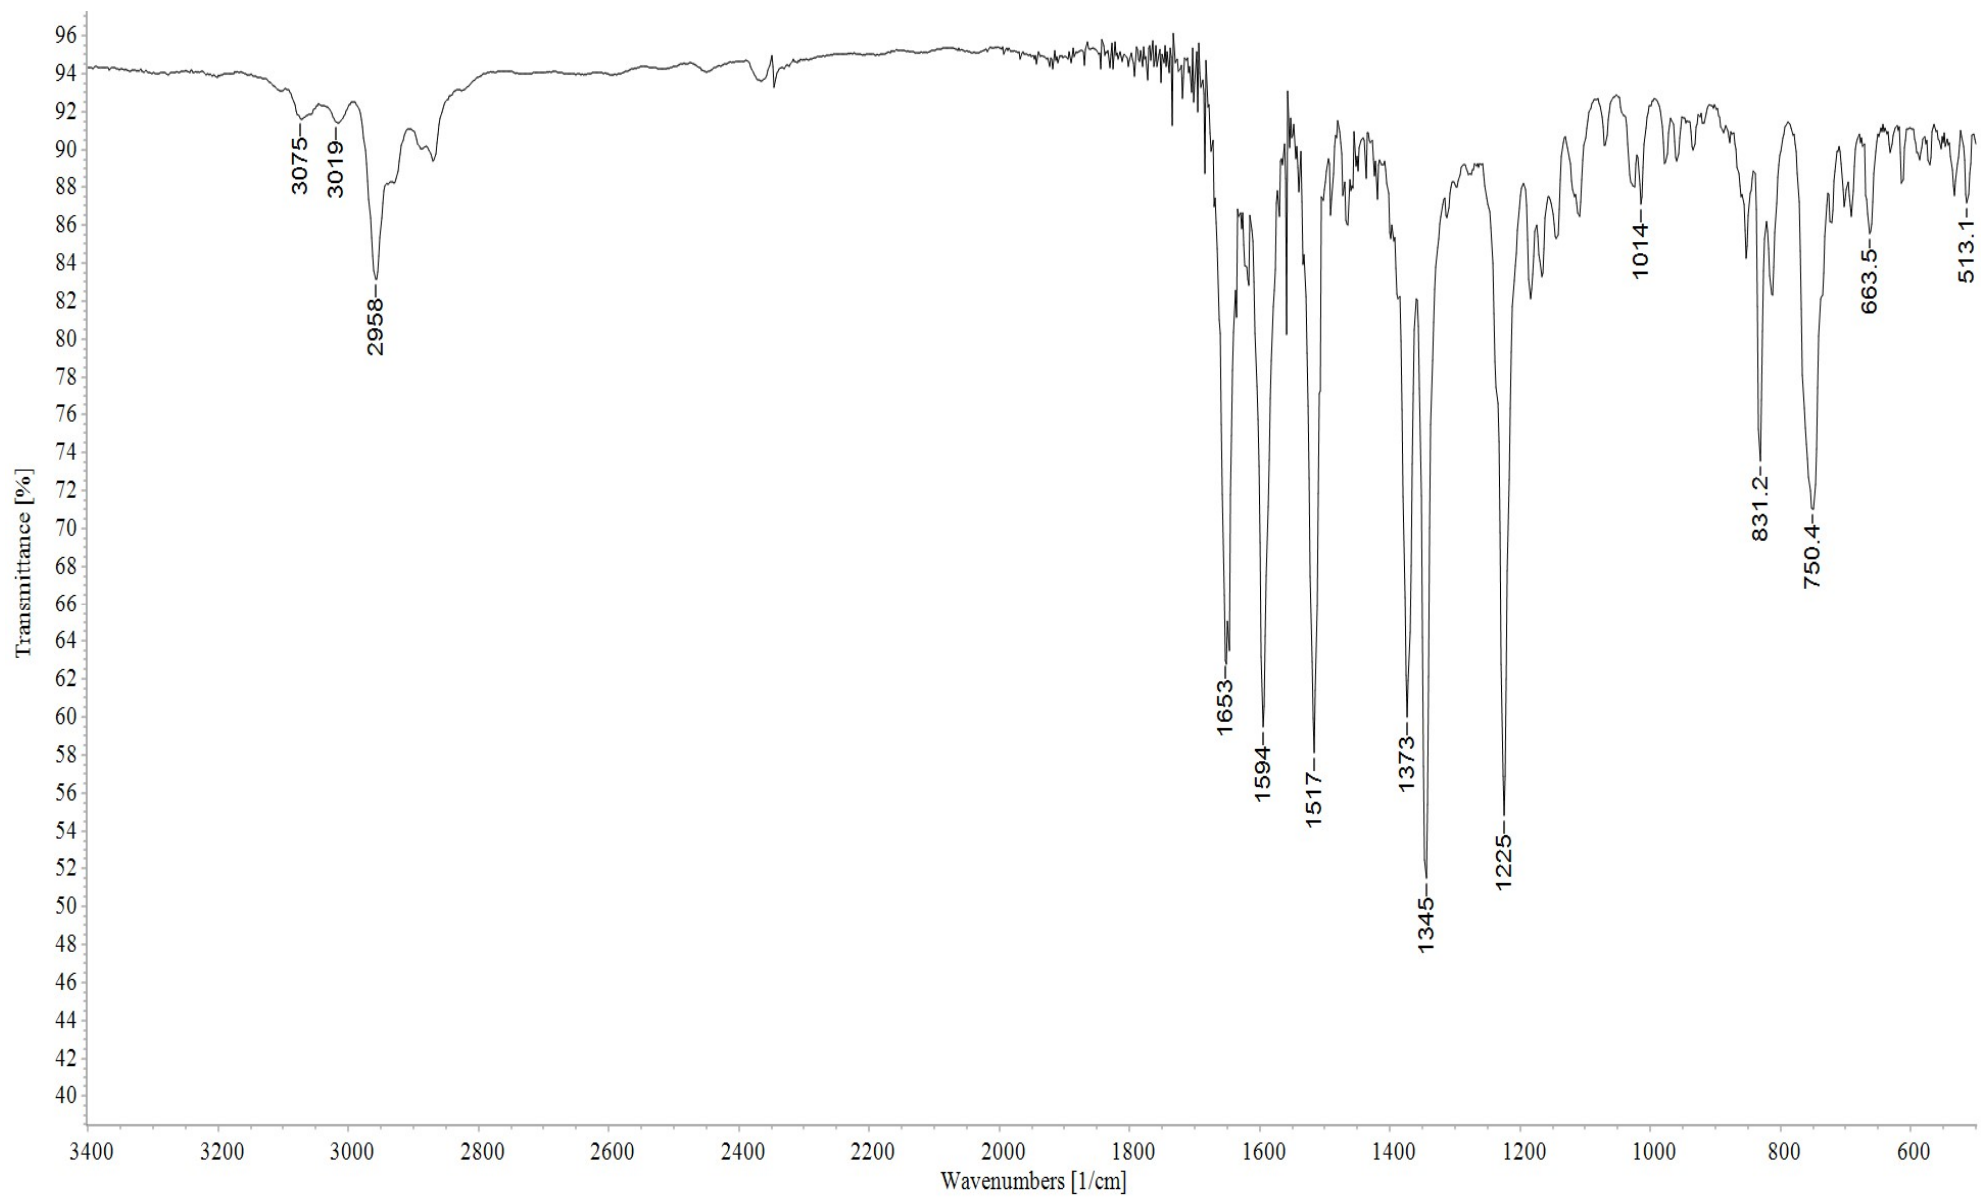

Figure S11 - FT-IR spectrum of 9,9-dimethyl-12-(4-chlorophenyl)-8,9,10,12-tetrahydrobenzo[a]xanthene-11-one (4d), NaCl

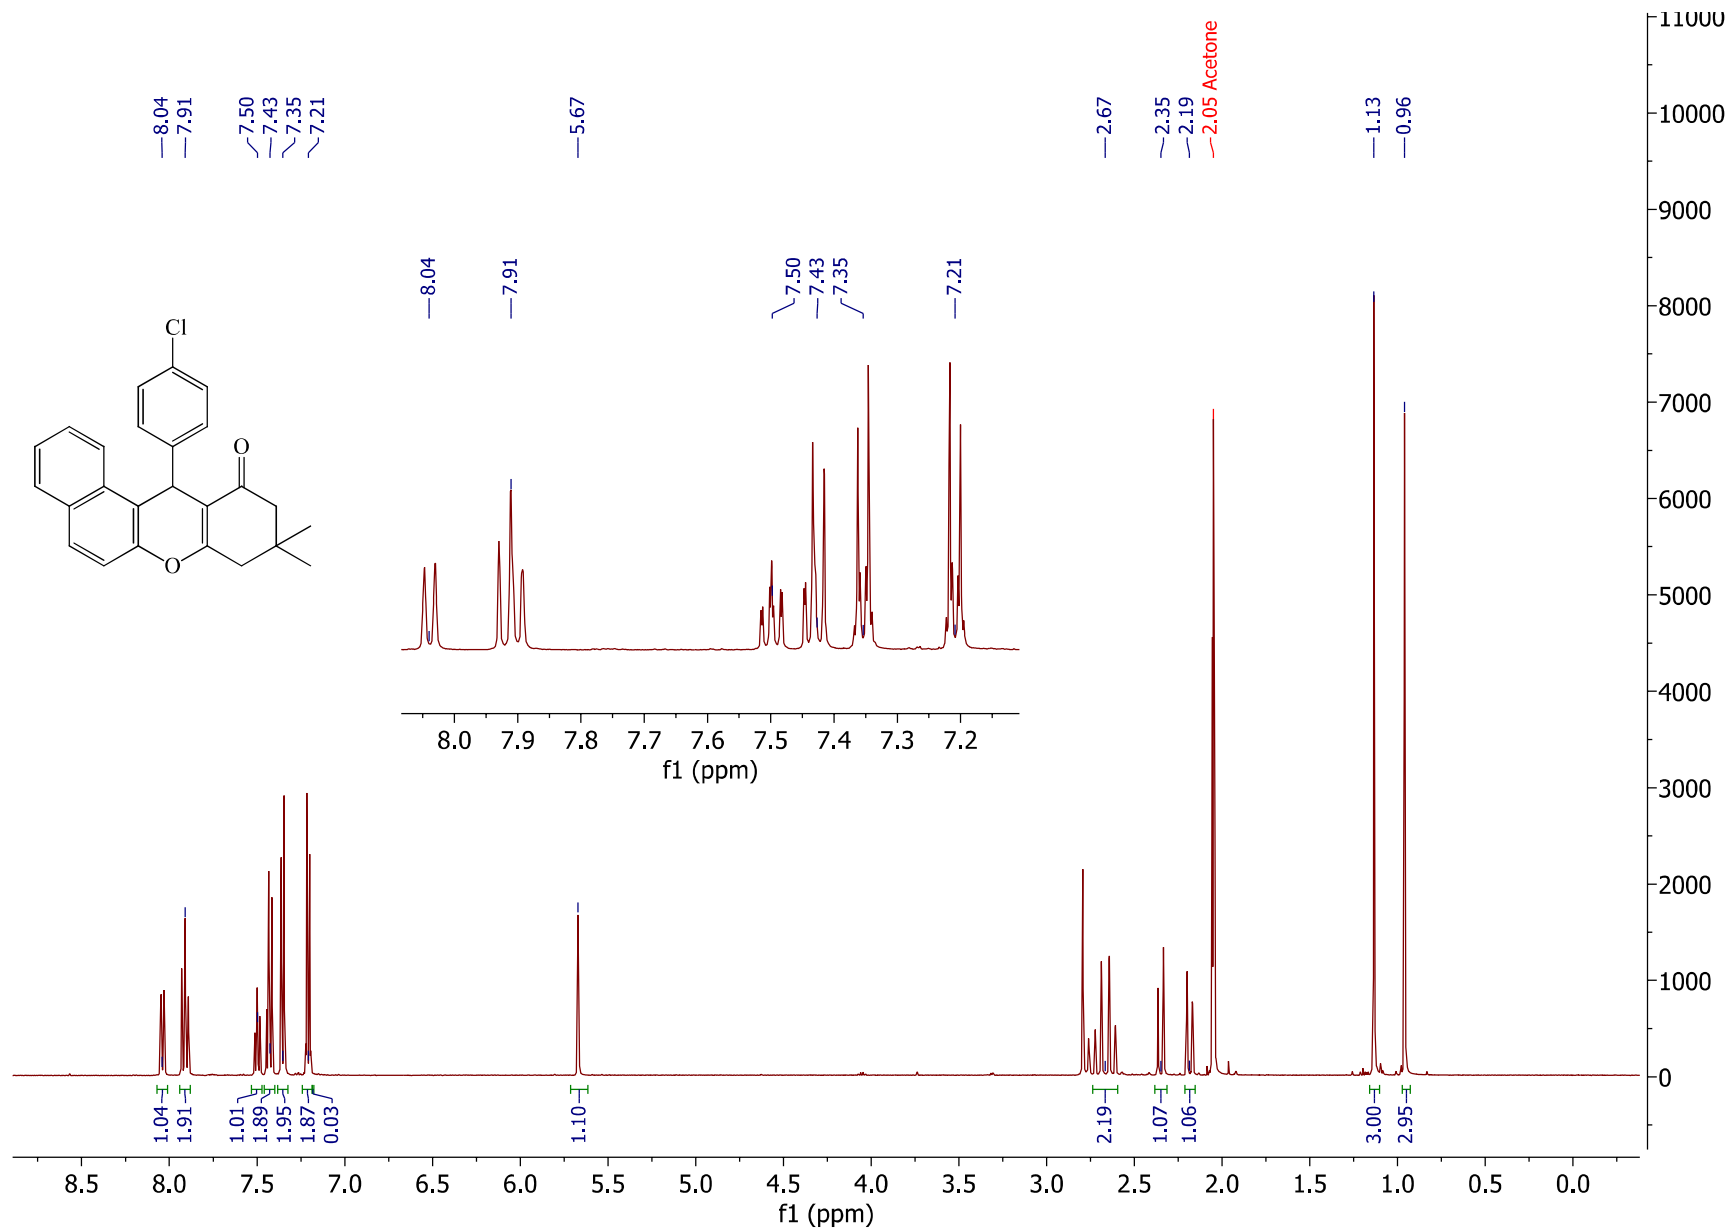

Figure S12 - <sup>1</sup>H-NMR spectrum of 9,9-dimethyl-12-(4-chlorophenyl)-8,9,10,12-tetrahydrobenzo[a]xanthen-11-one (4d), in acetone-d<sub>6</sub>



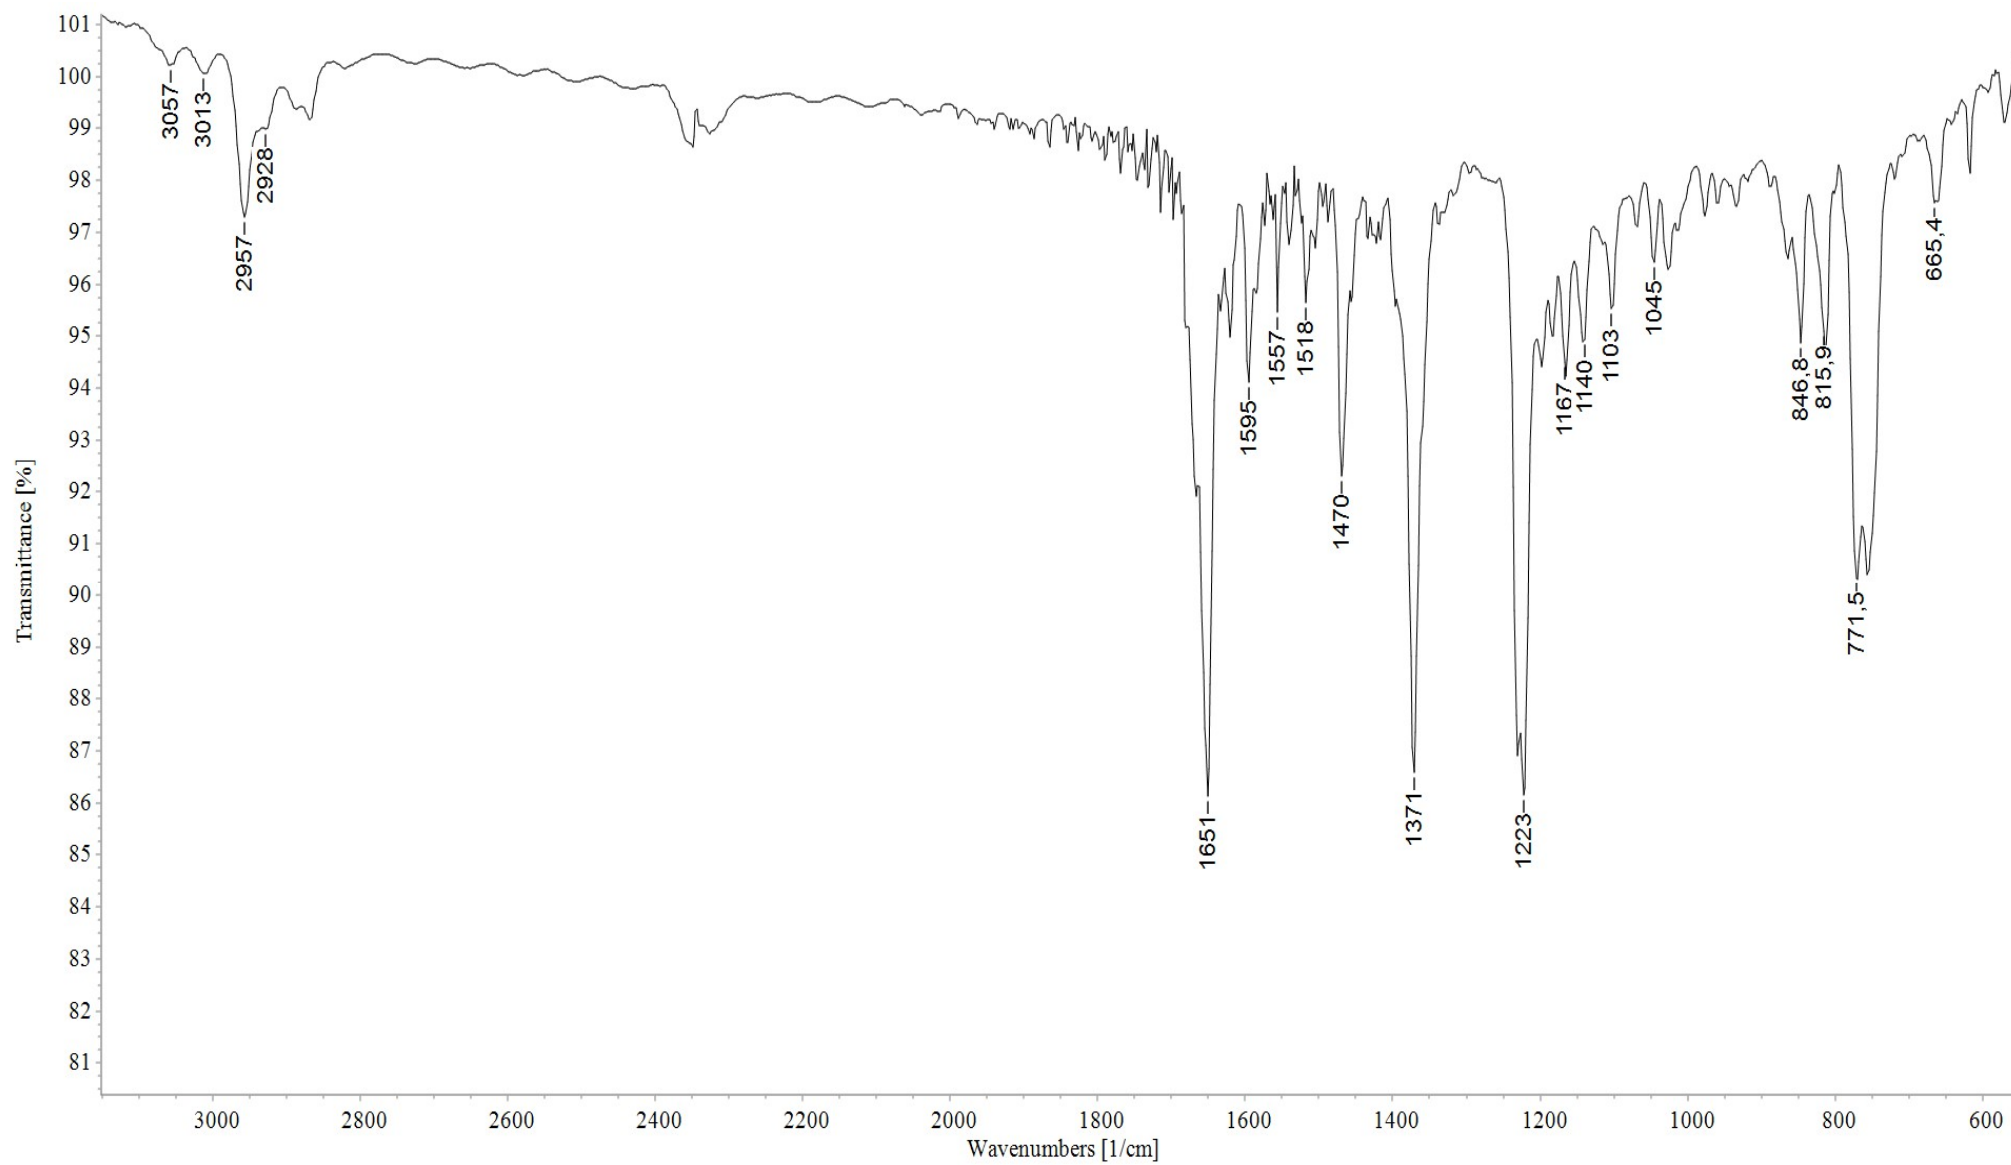

Figure S13 - FT-IR spectrum of 9,9-dimethyl-12-(2,4-dichlorophenyl)-8,9,10,12-tetrahydrobenzo[a]xanthene-11-one (4e), NaCl

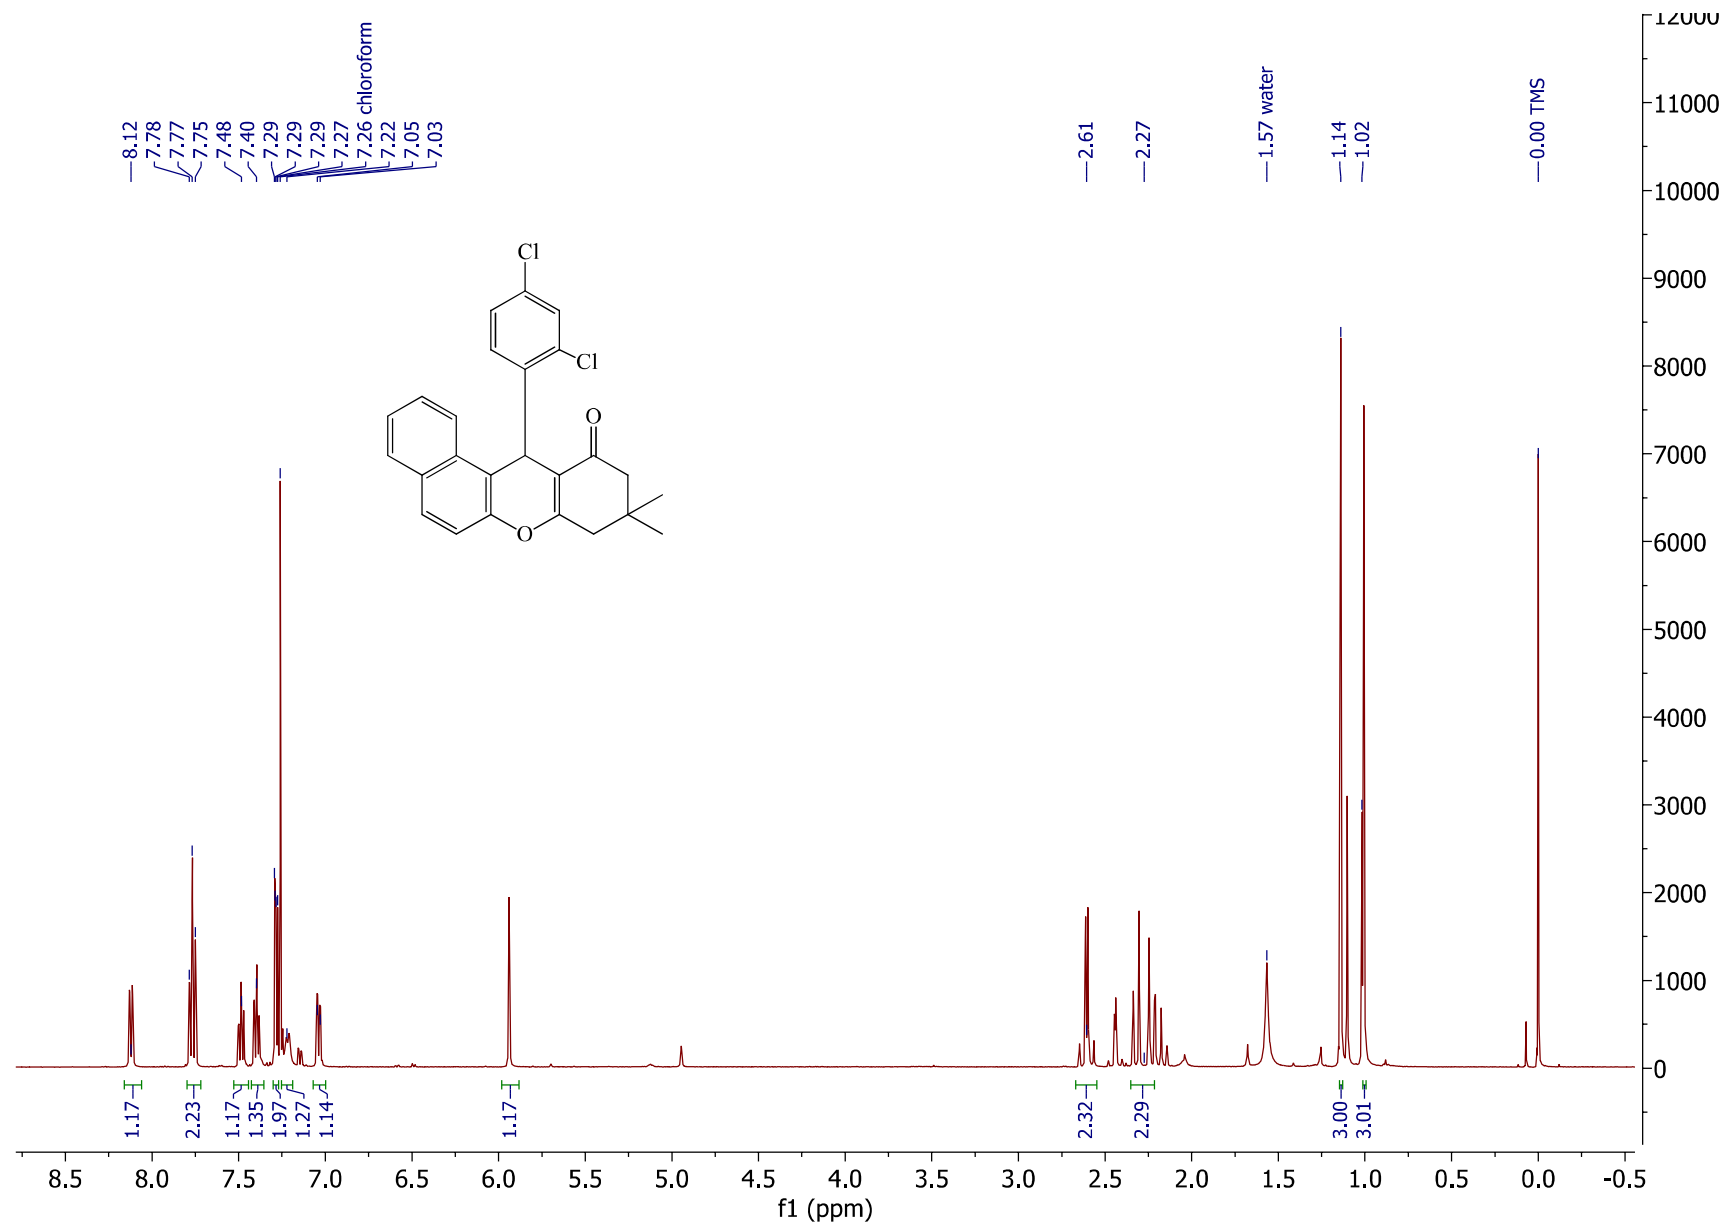

Figure S14 - <sup>1</sup>H-NMR spectrum of 9,9-dimethyl-12-(2,4-dichlorophenyl)-8,9,10,12-tetrahydrobenzo[a]xanthen-11-one (4c), in chloroform-d

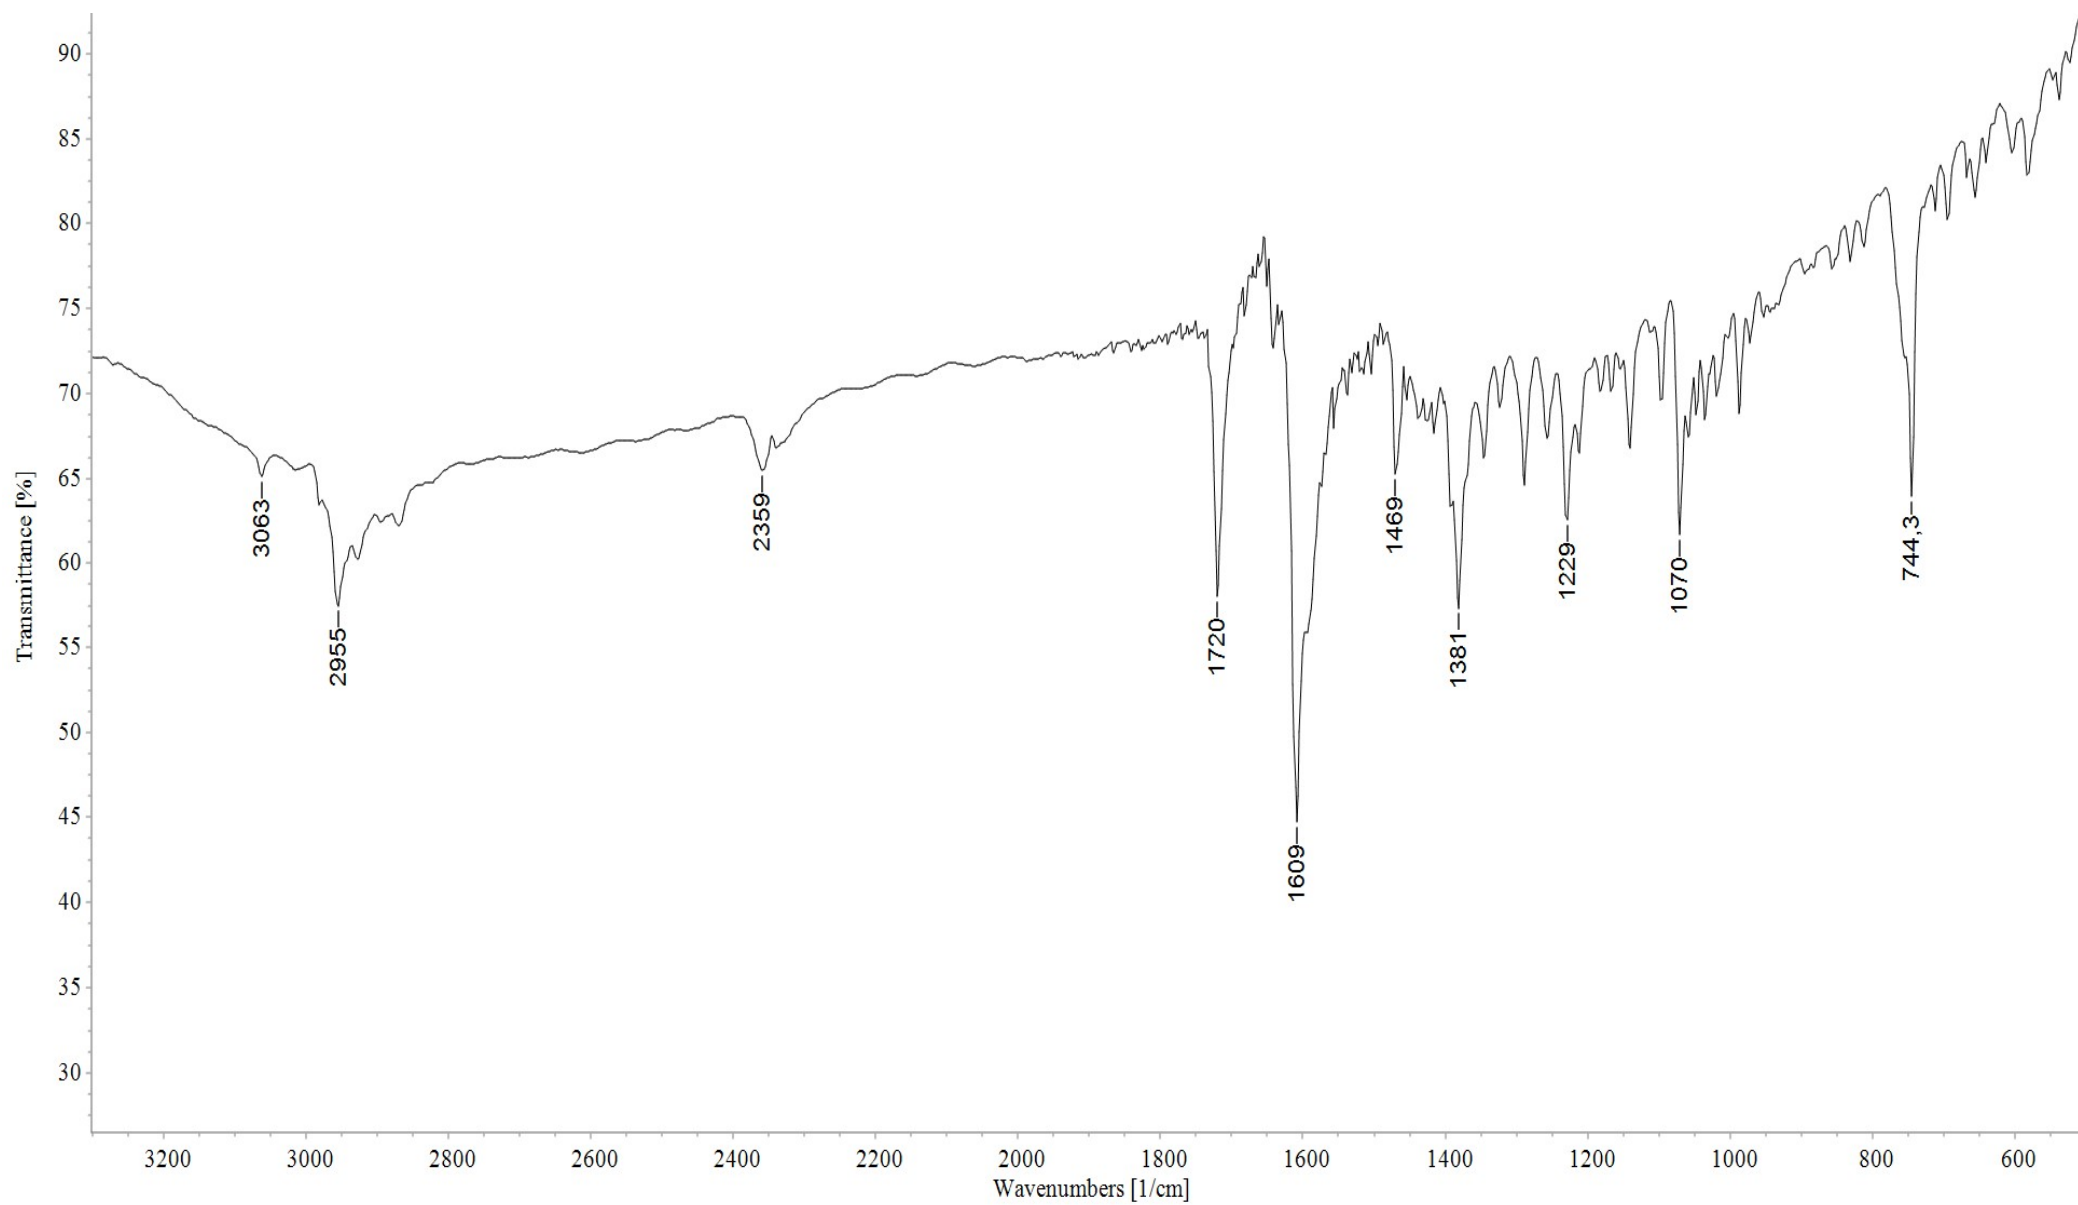

Figure S15 - FT-IR spectrum of 9,9-dimethyl-12-(2-chlorophenyl)-8,9,10,12-tetrahydrobenzo[a]xanthene-11-one (4f), NaCl

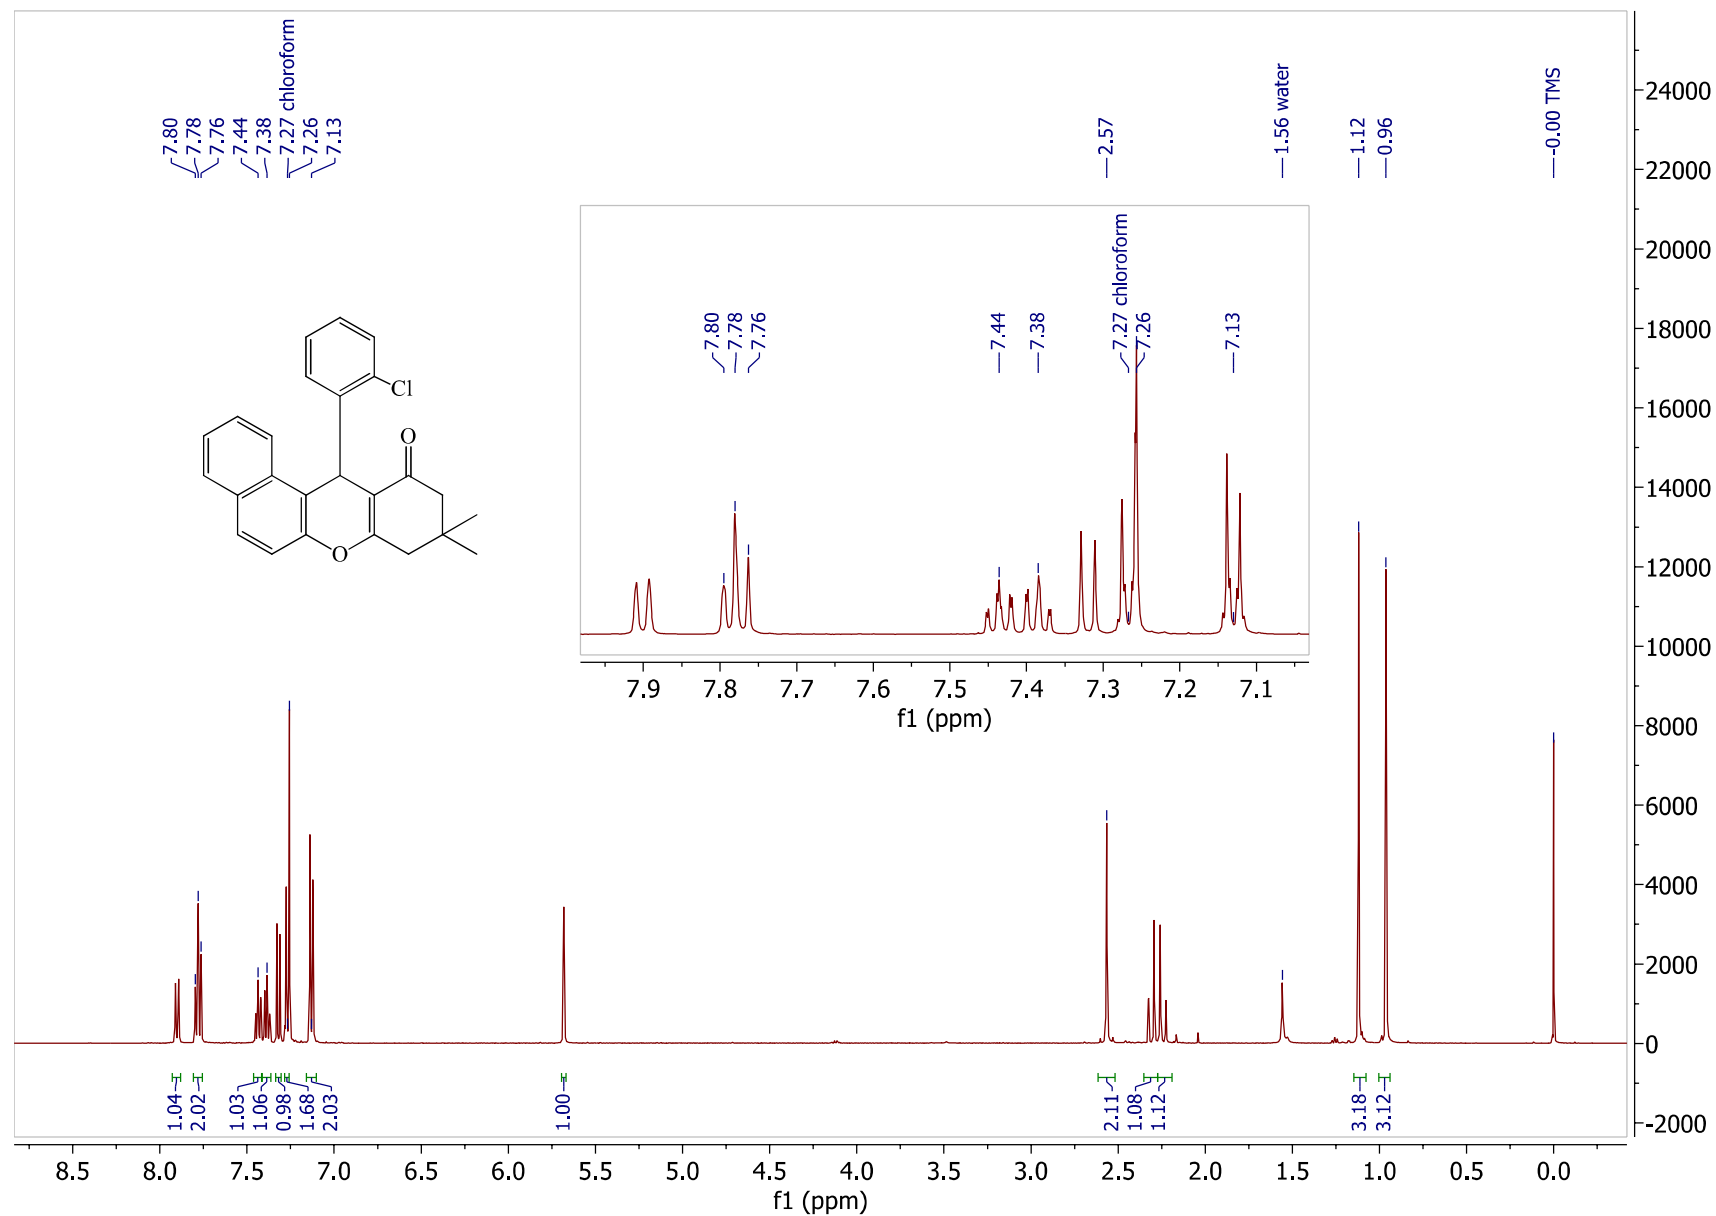

Figure S16 - <sup>1</sup>H-NMR spectrum of 9,9-dimethyl-12-(2-chlorophenyl)-8,9,10,12-tetrahydrobenzo[a]xanthen-11-one (4f), in chloroform-d

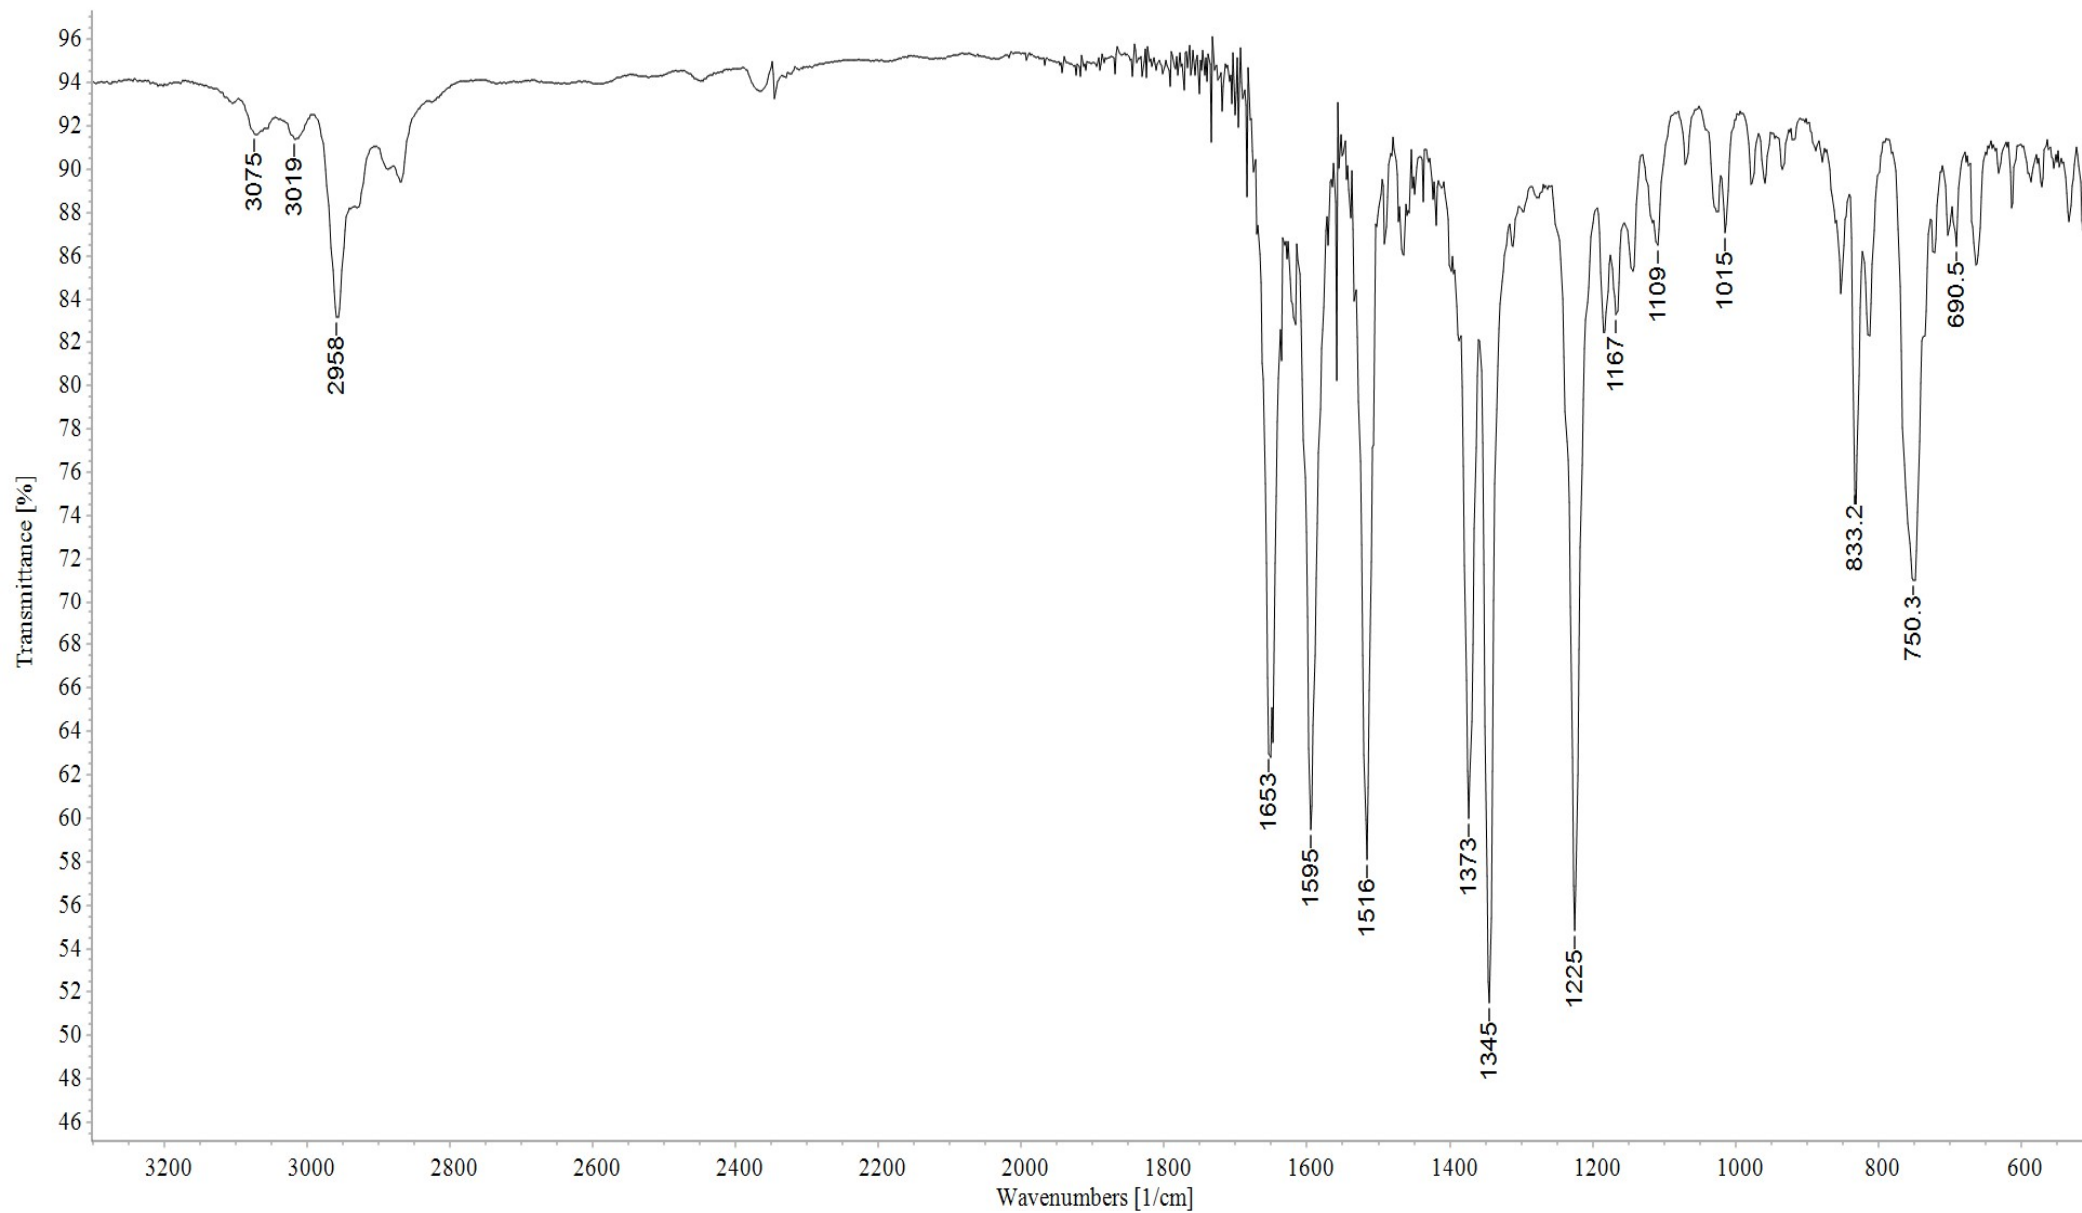

Figure S17 - FT-IR spectrum of 9,9-dimethyl-12-(4-nitrophenyl)-8,9,10,12-tetrahydrobenzo[a]xanthen-11-one (4g), NaCl

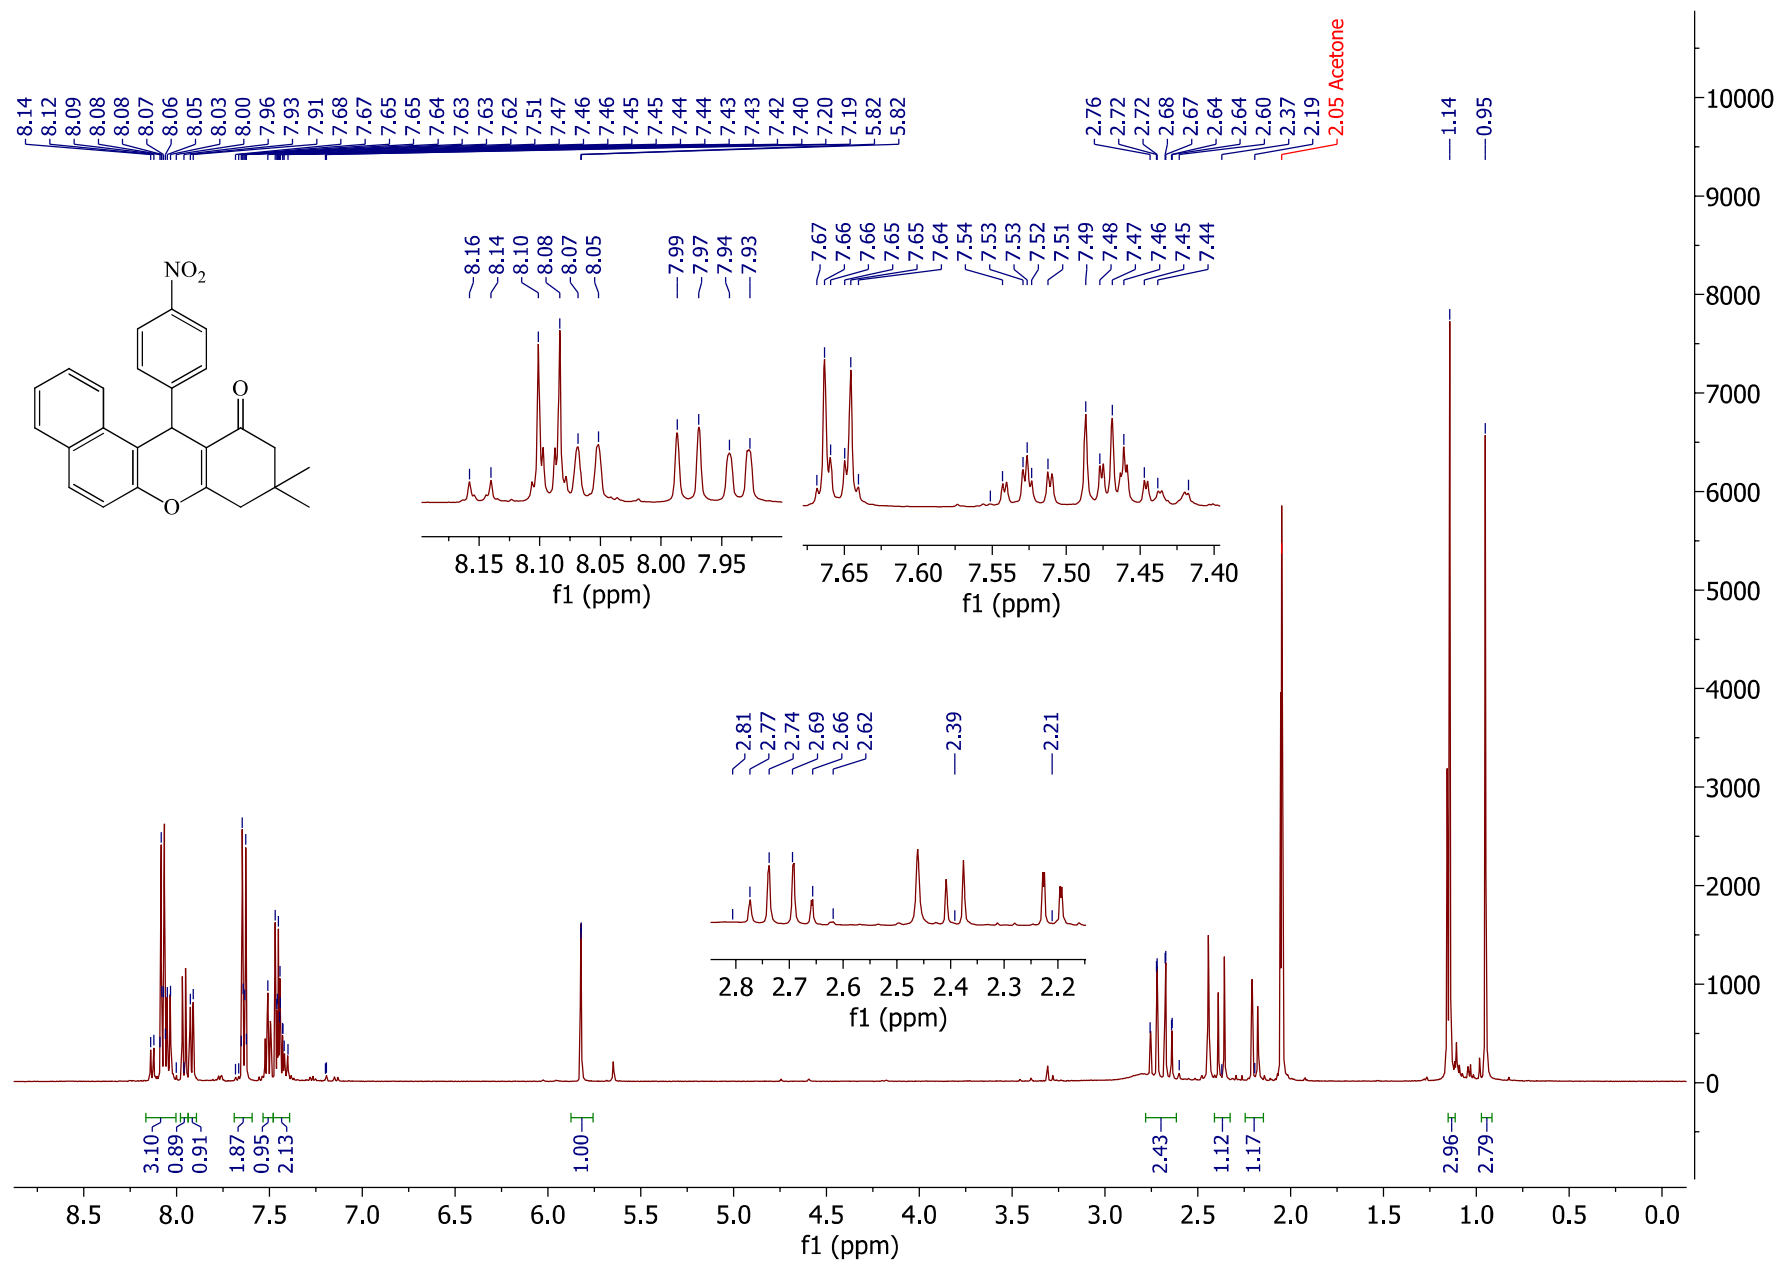

Figure S18 - <sup>1</sup>H-NMR spectrum of 9,9-dimethyl-12-(4-nitrophenyl)-8,9,10,12-tetrahydrobenzo[a]xanthene-11-one (4g), in acetone-d<sub>6</sub>

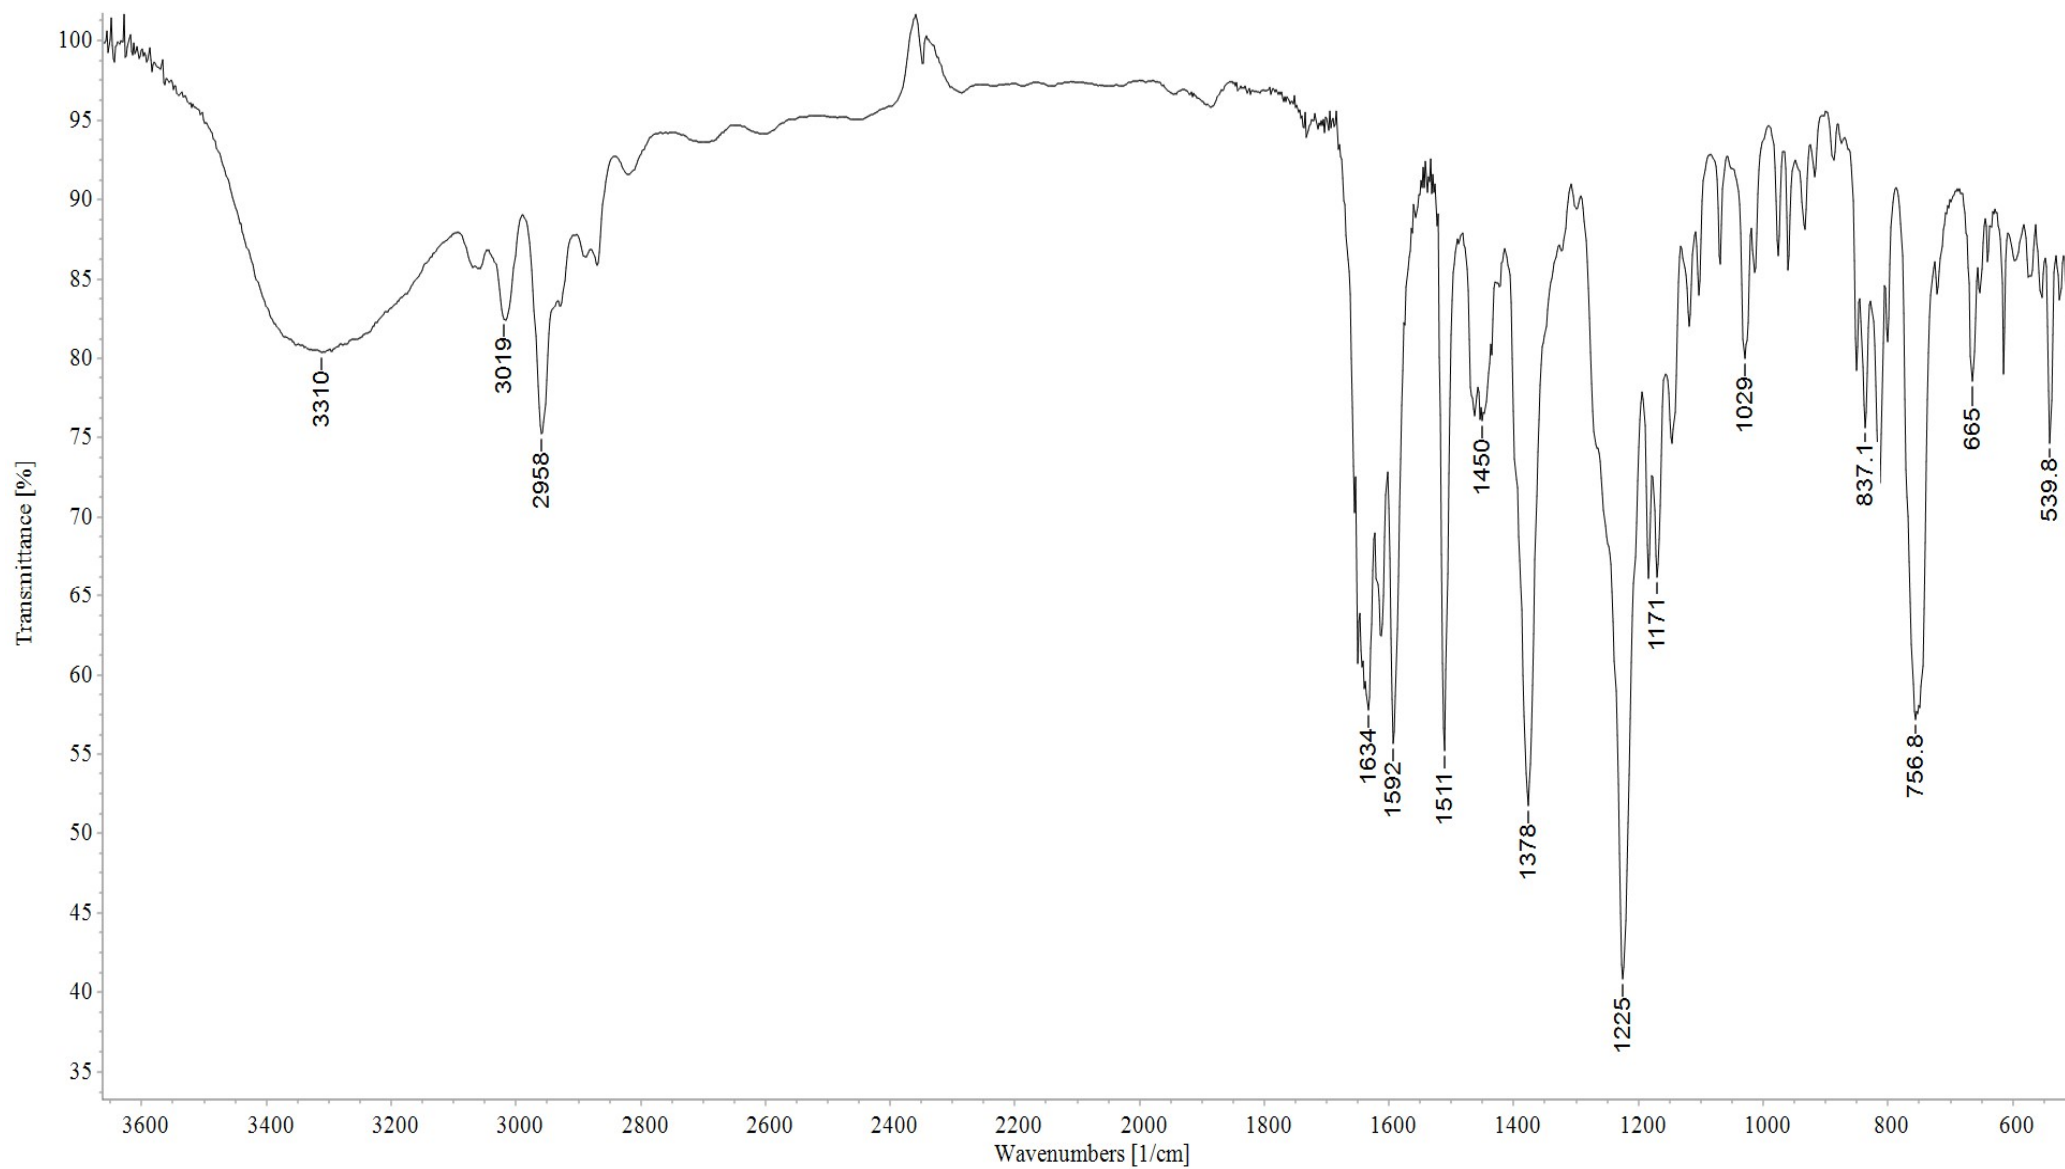

Figure S19 - FT-IR spectrum of 9,9-dimethyl-12-(4-hydroxyphenyl)-8,9,10,12-tetrahydrobenzo[a]xanthen-11-one (4h), NaCl

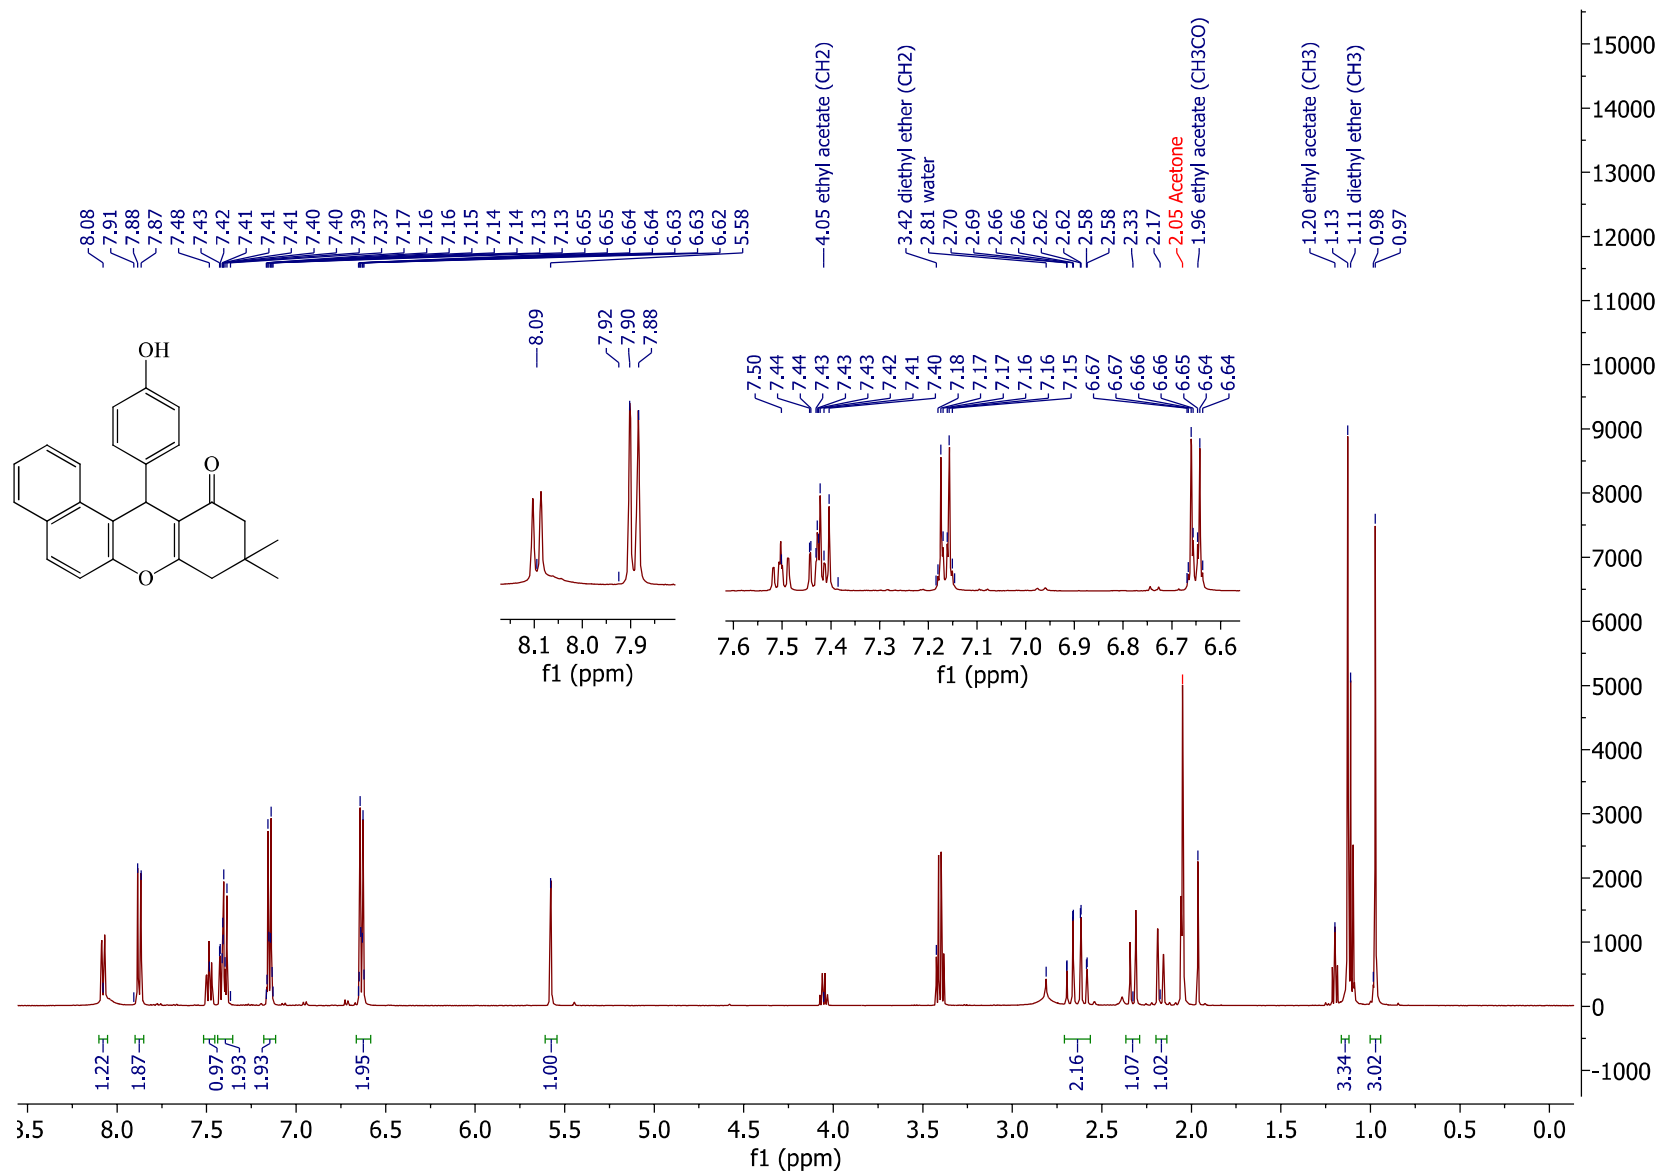

Figure S20 - <sup>1</sup>H-NMR spectrum of 9,9-dimethyl-12-(4-hydroxyphenyl)-8,9,10,12-tetrahydrobenzo[a]xanthene-11-one (4h), in acetone-d<sub>6</sub>



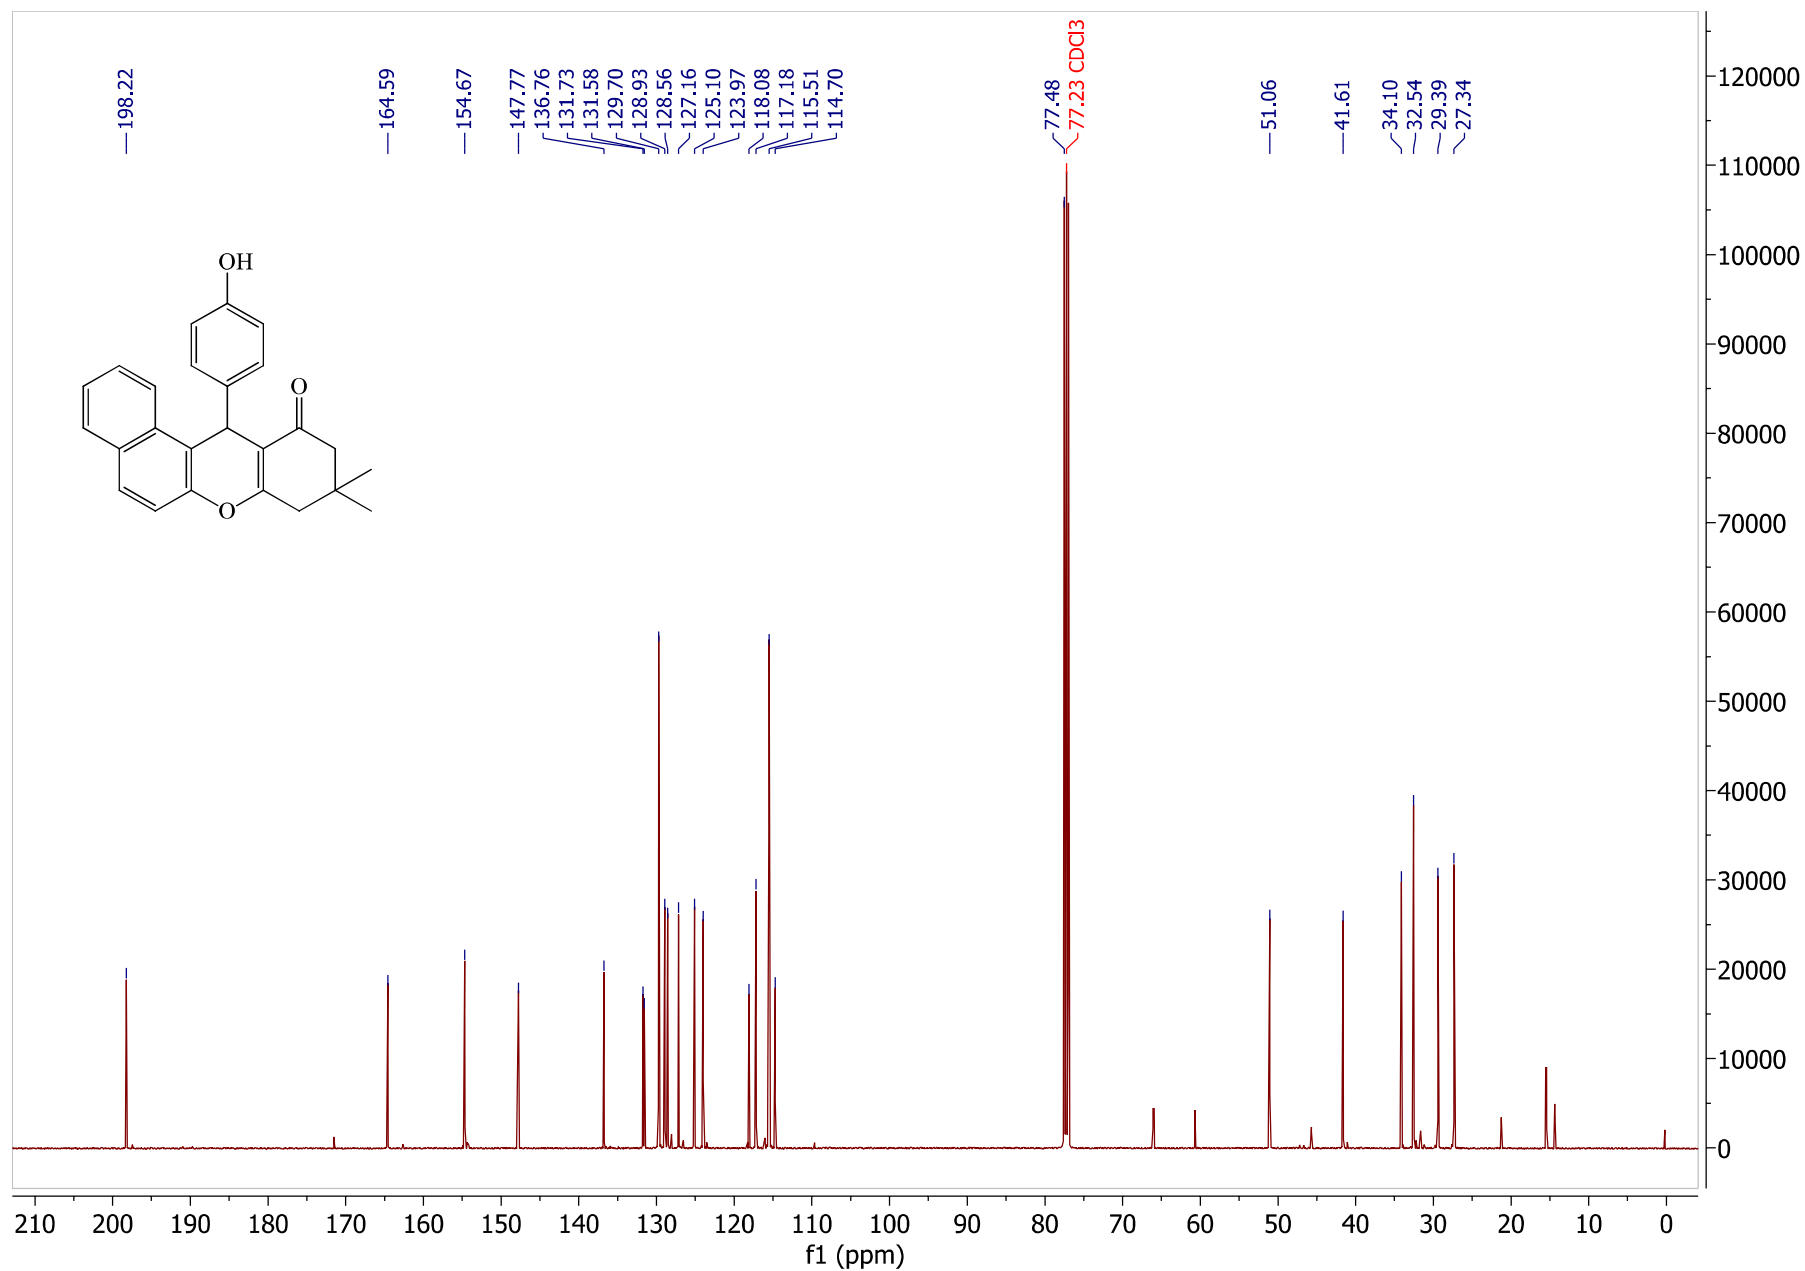

Figure S21 - <sup>13</sup>C-NMR spectrum of 9,9-dimethyl-12-(4-hydroxyphenyl)-8,9,10,12-tetrahydrobenzo[a]xanthene-11-one (4h), in chloroform-d

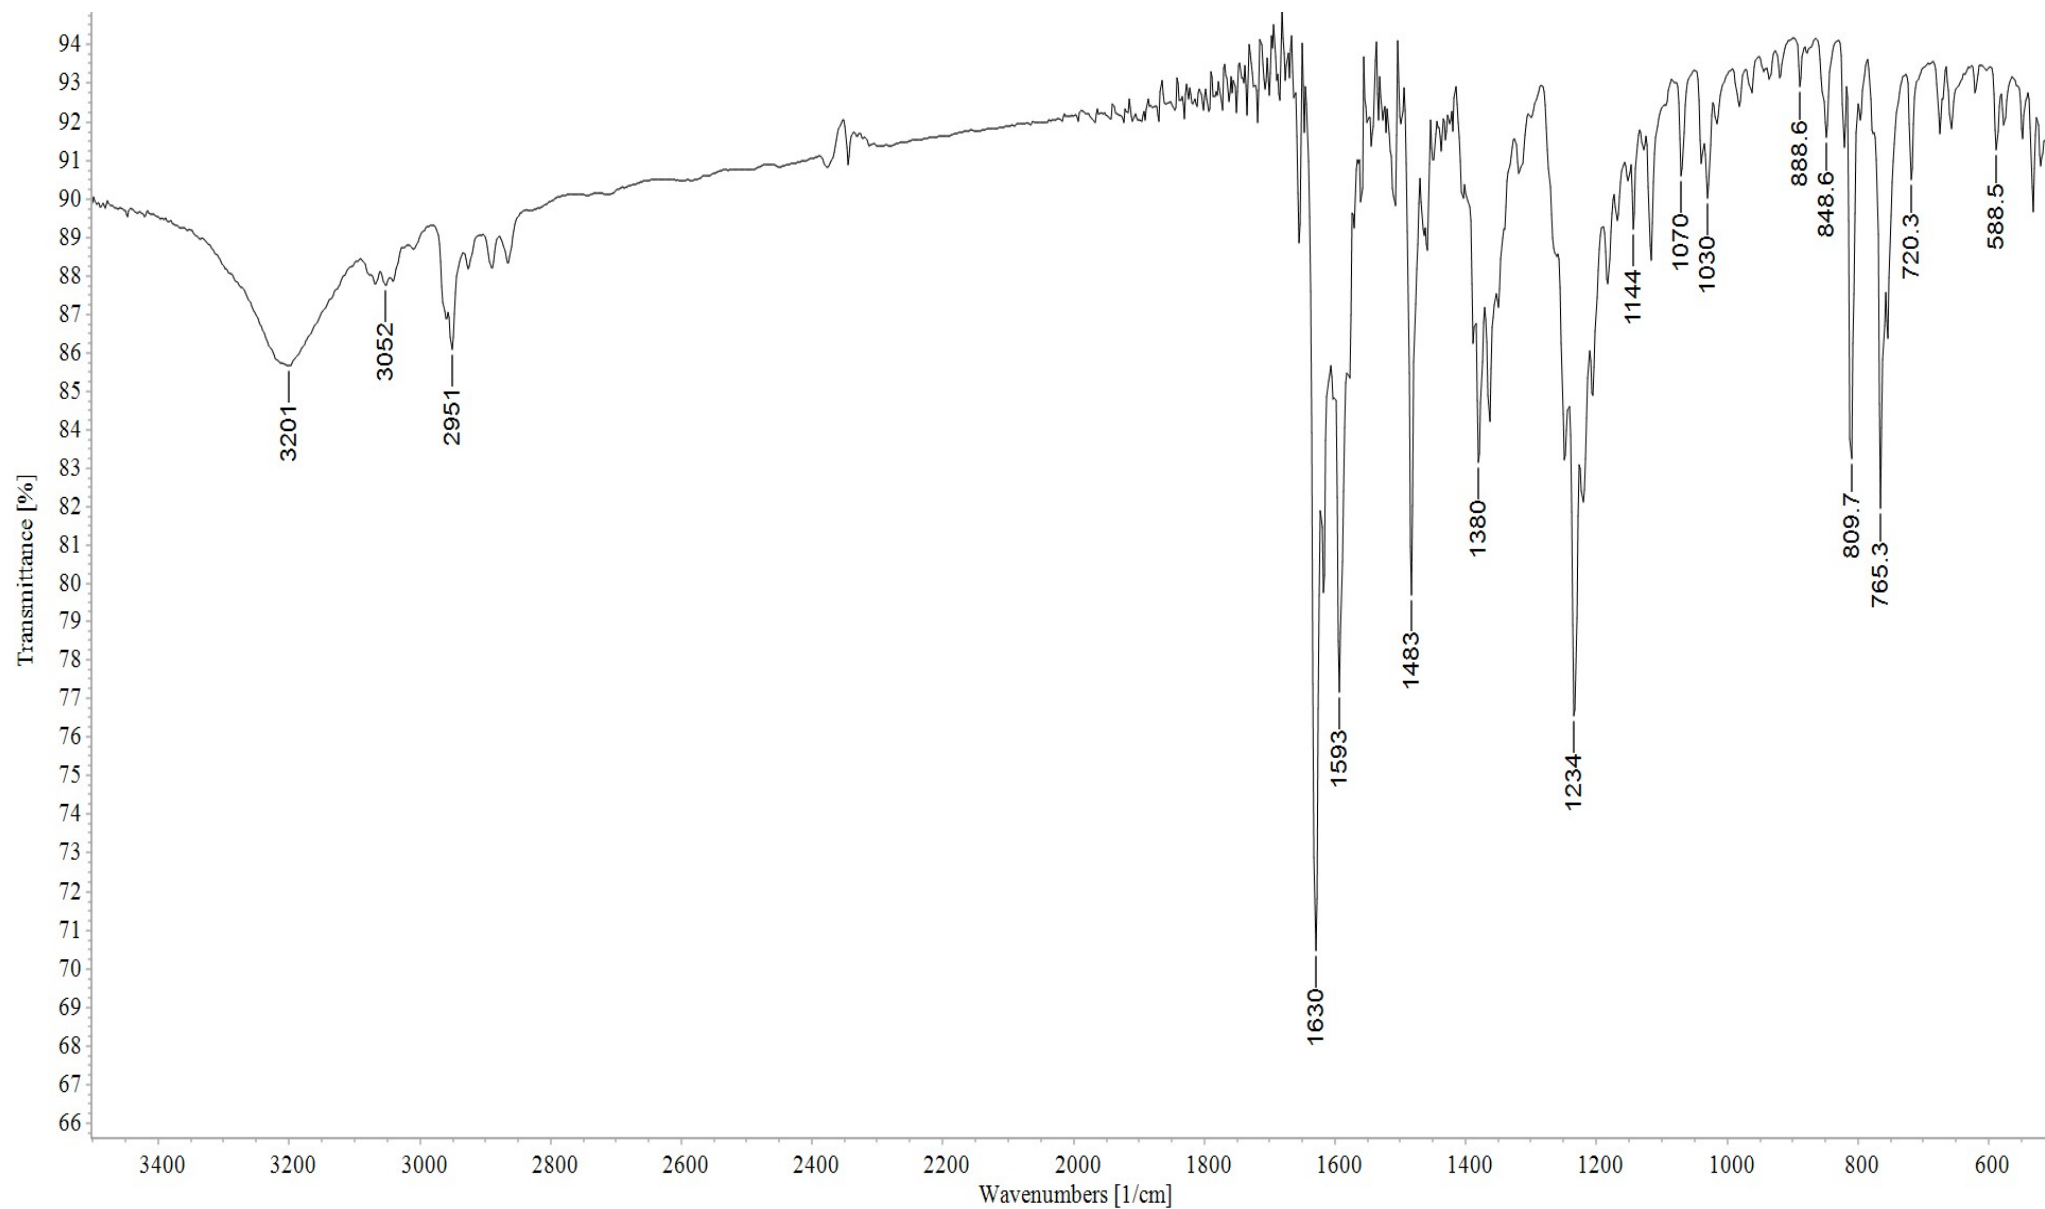

Figure S22 - FT-IR spectrum of 9,9-dimethyl-12-(2-hydroxyphenyl)-8,9,10,12-tetrahydrobenzo[a]xanthen-11-one (4i), NaCl

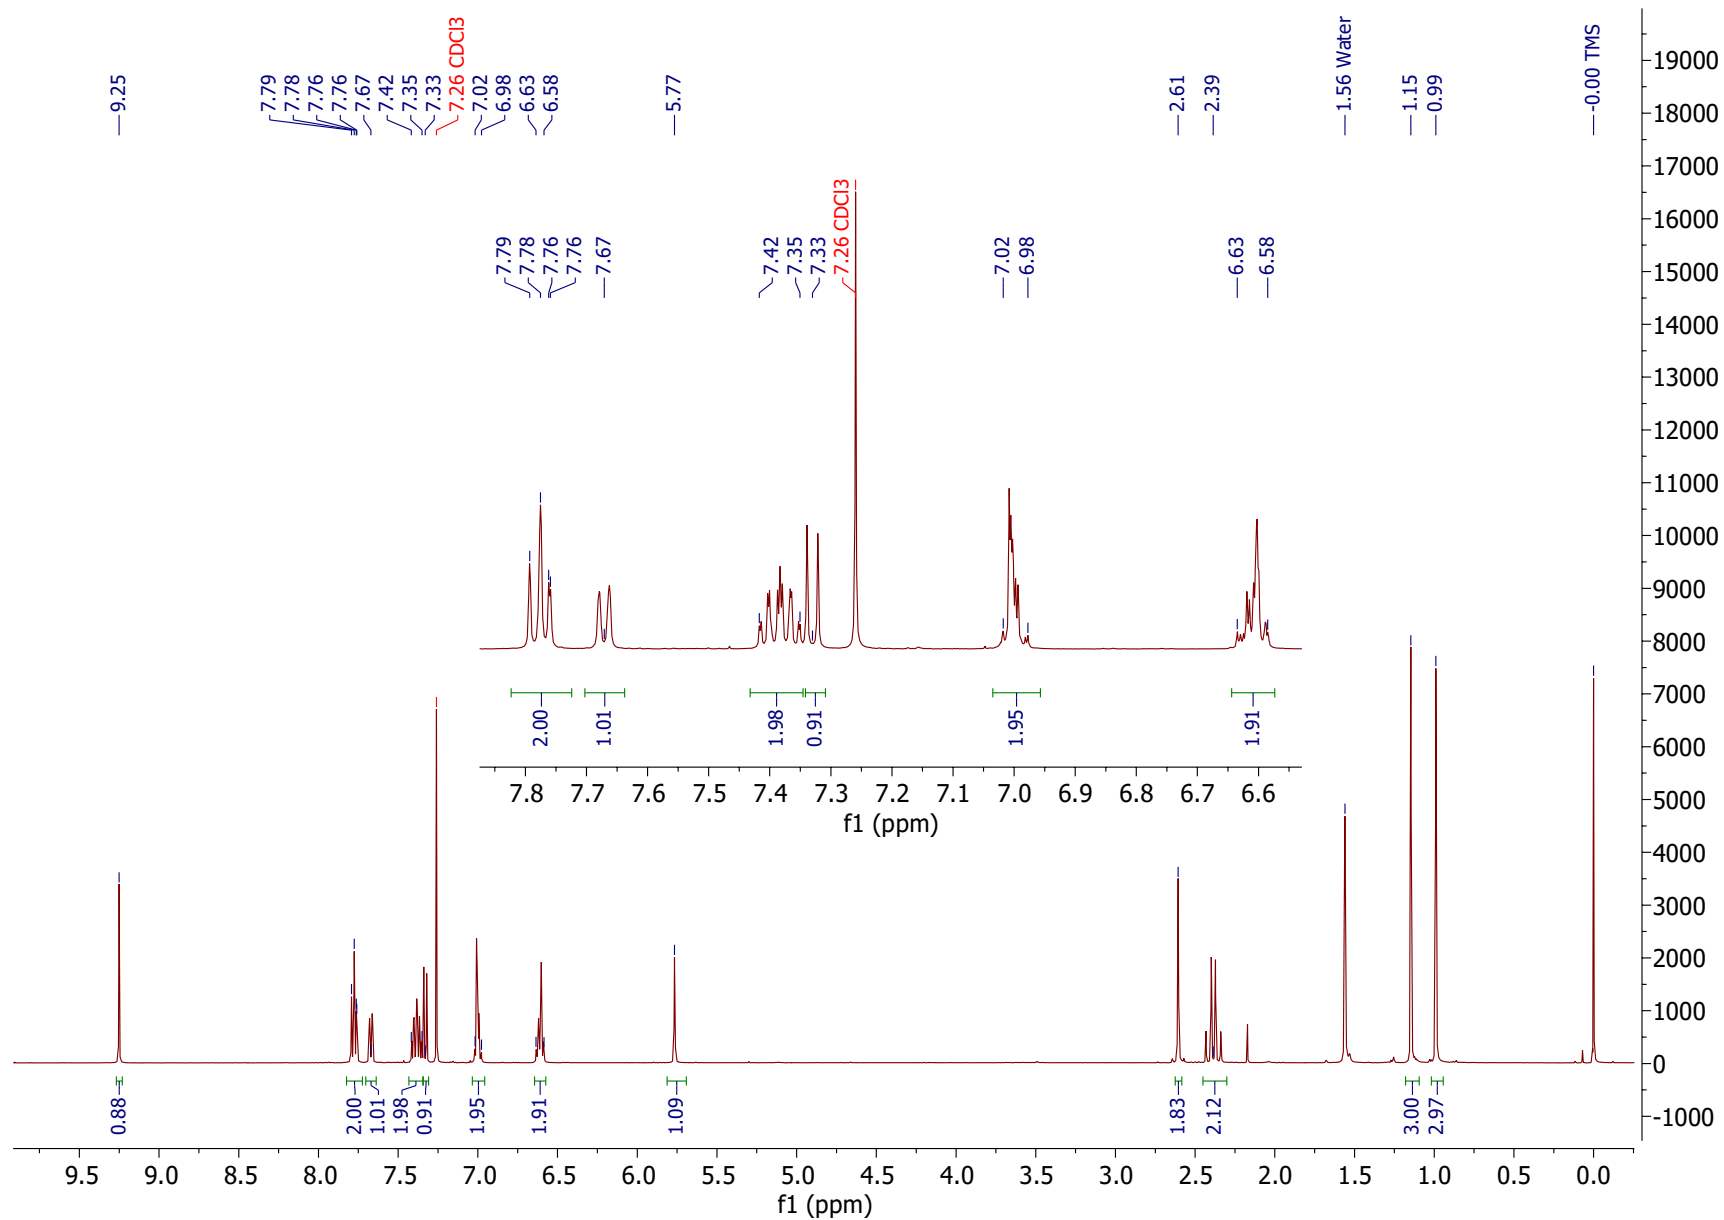

Figure S23 -  $^1\text{H}$  NMR spectrum of 9,9-dimethyl-12-(2-hydroxyphenyl)-8,9,10,12-tetrahydrobenzo[a]xanthene-11-one (4i), in  $\text{DMSO-d}_6$

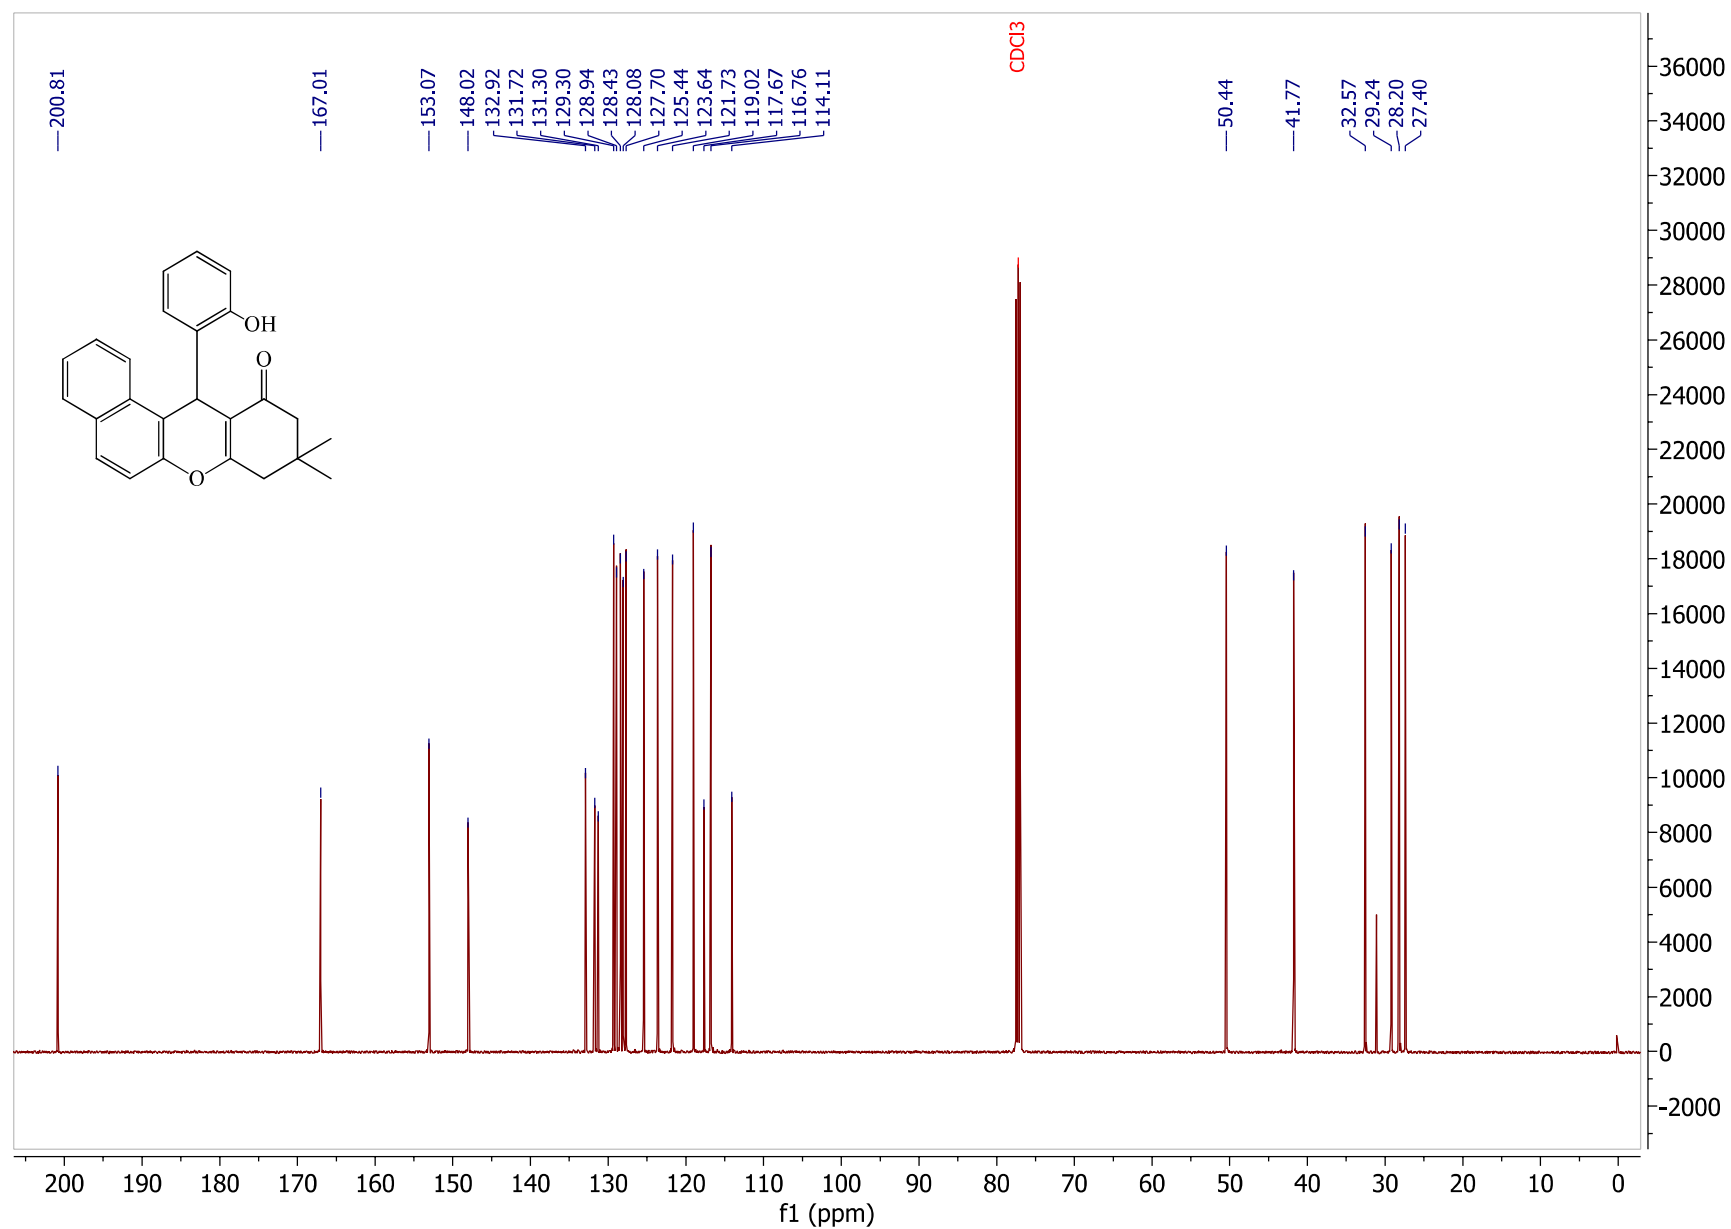

Figure S24 <sup>13</sup>C-NMR spectrum of 9,9-dimethyl-12-(4-hydroxyphenyl)-8,9,10,12-tetrahydrobenzo[a]xanthen-11-one (4i), in chloroform-d<sub>6</sub>

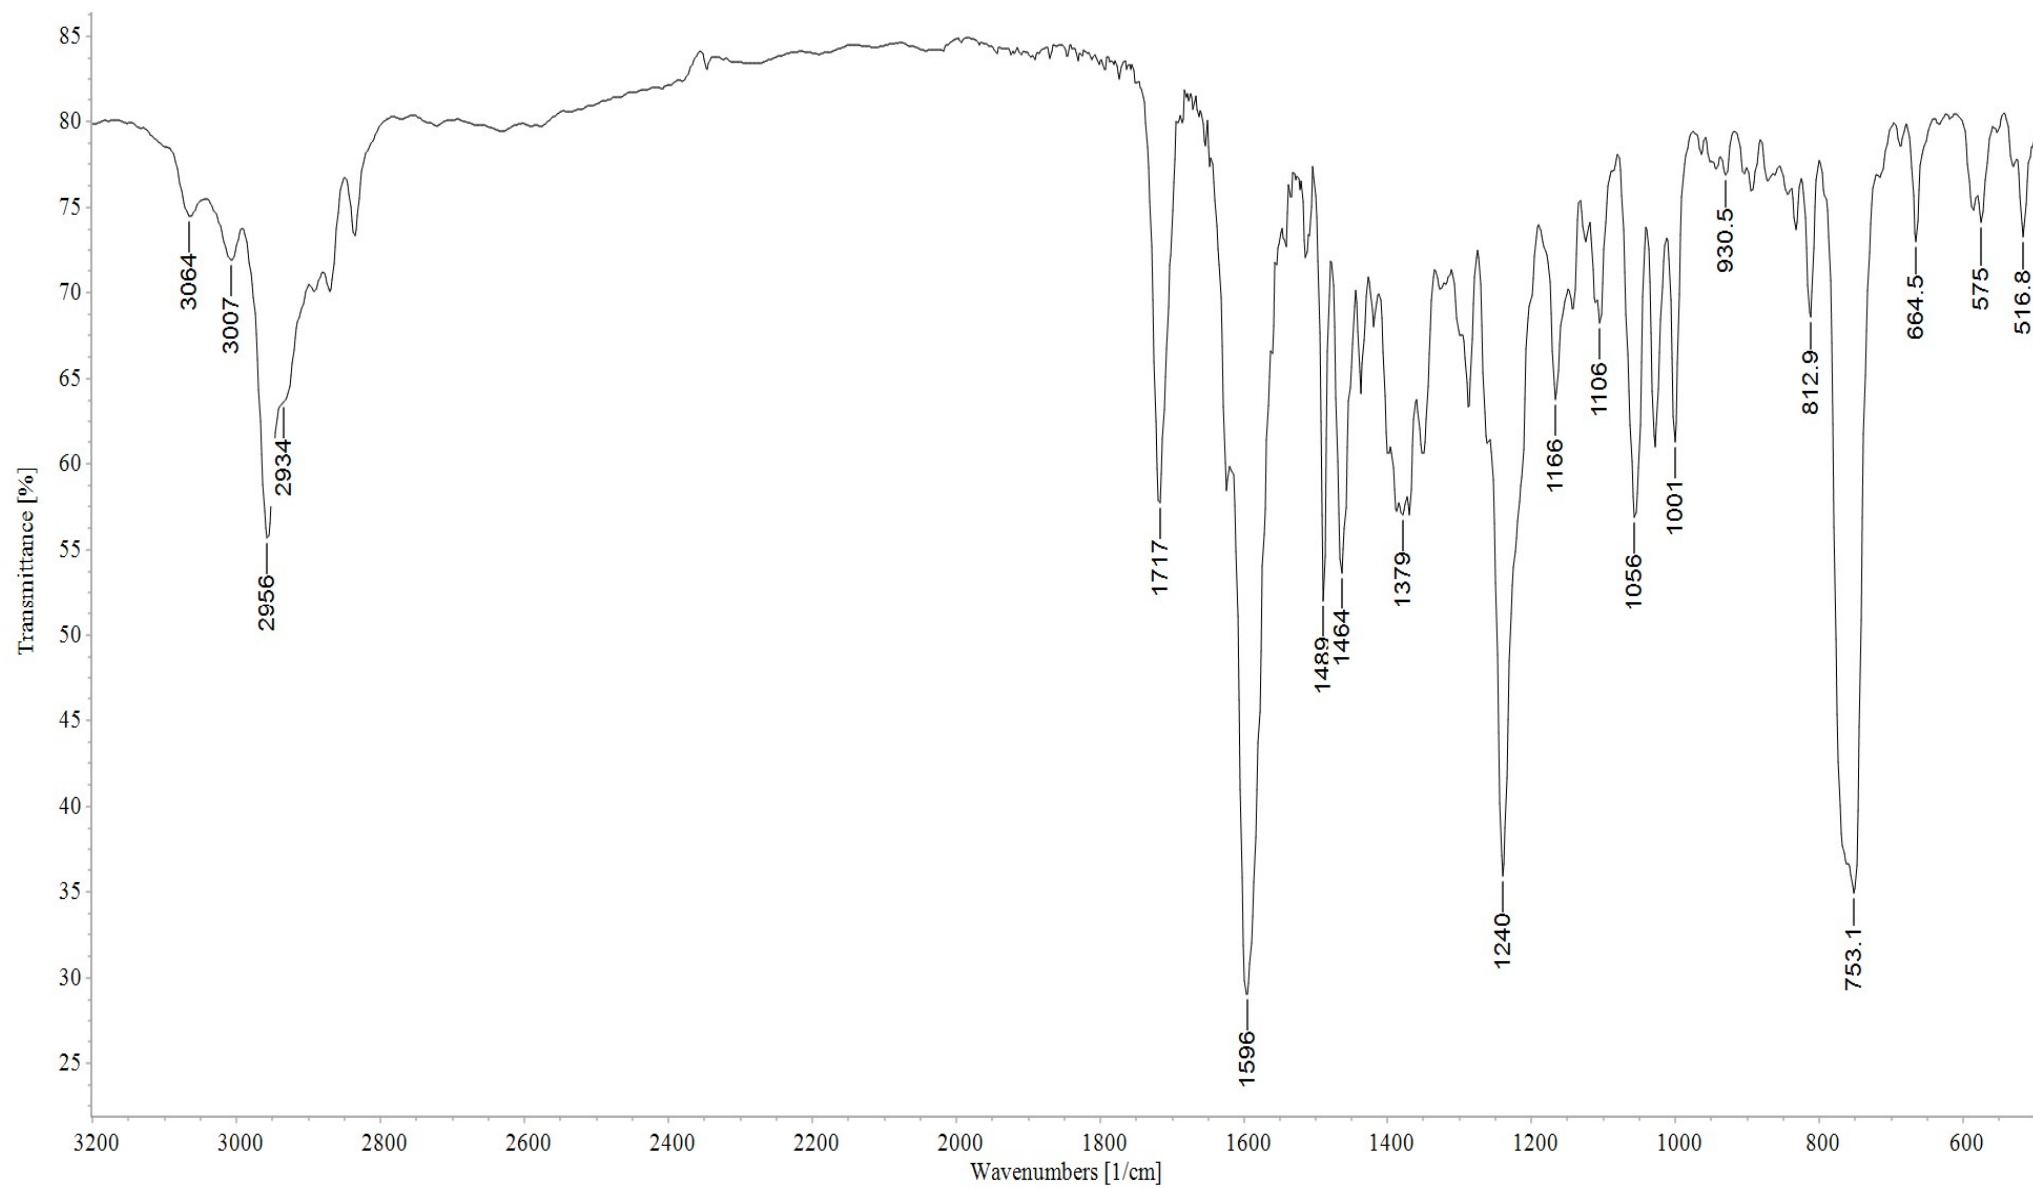

Figure S25 - FT-IR spectrum of 9,9-dimethyl-12-(2-methoxyphenyl)-8,9,10,12-tetrahydrobenzo[a]xanthene-11-one (4j), NaCl

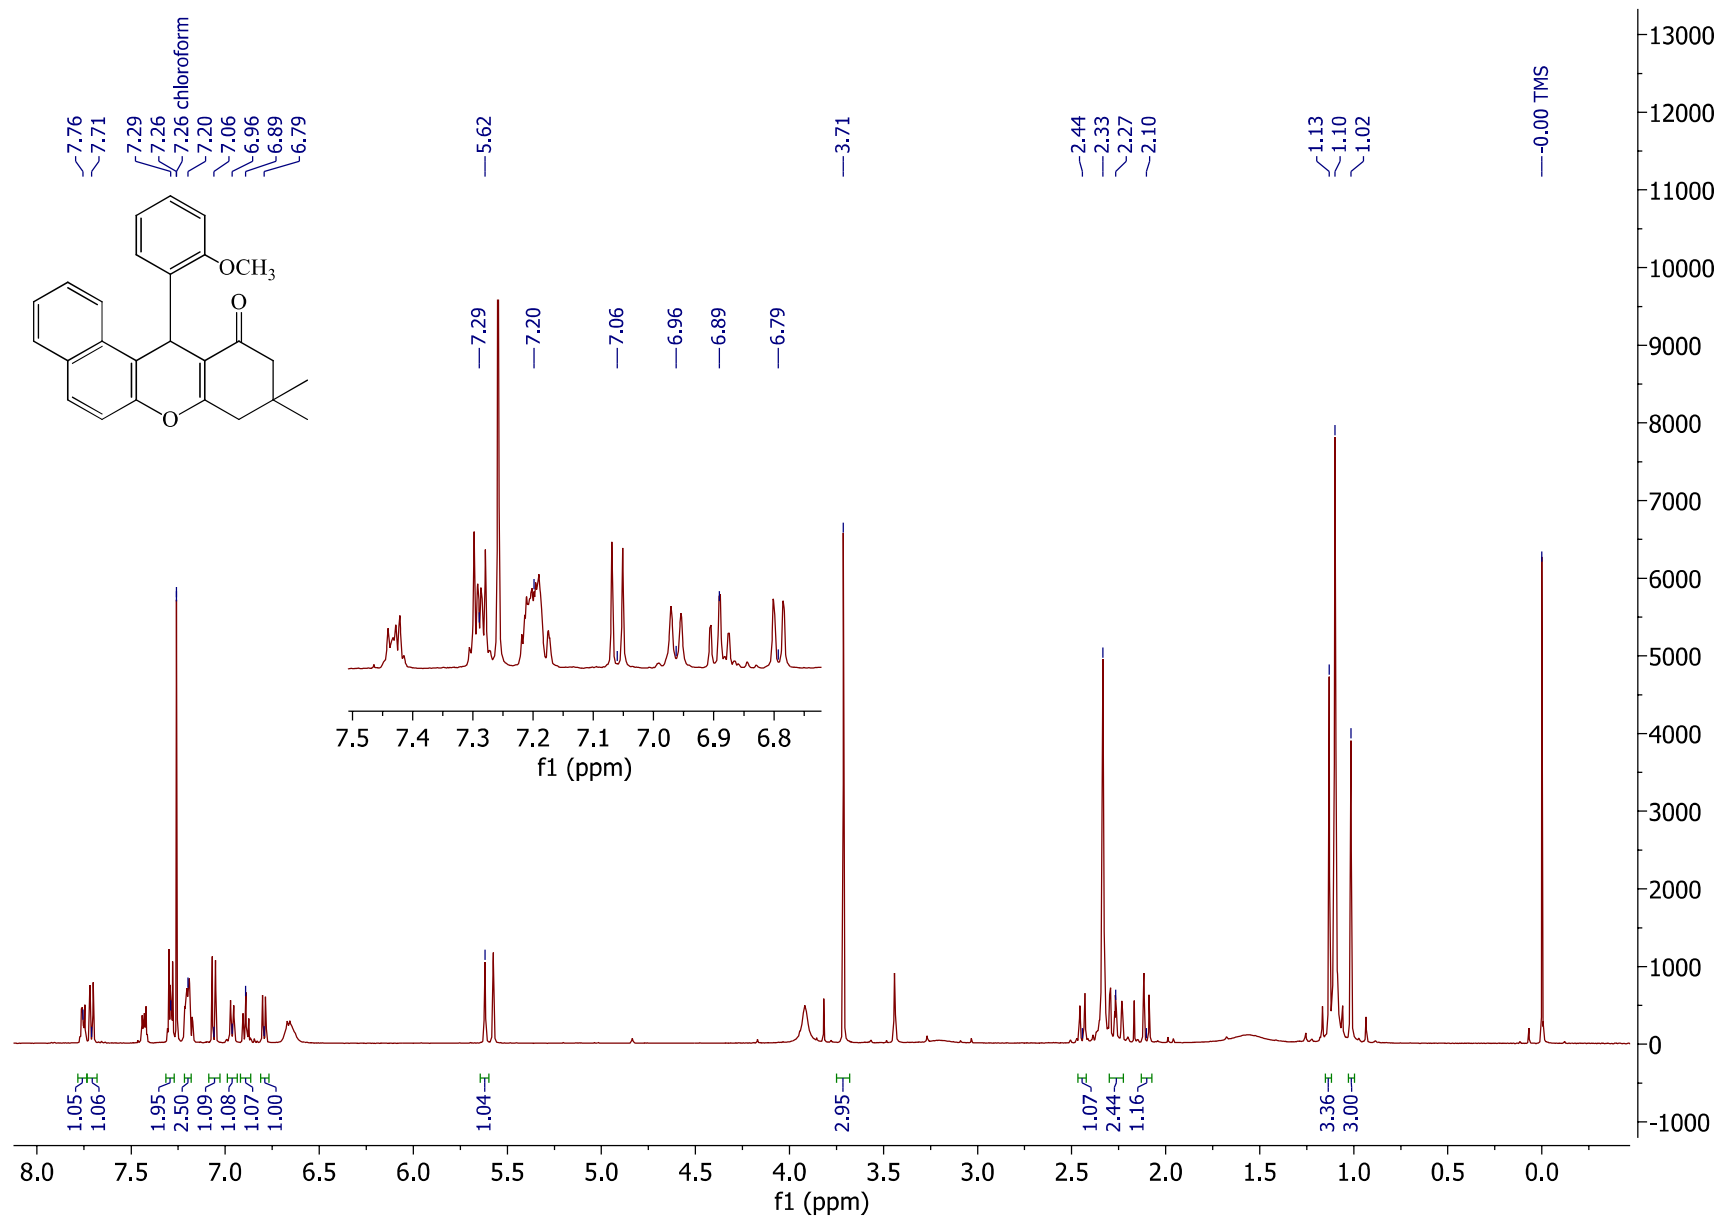

Figure S26 - <sup>1</sup>H-NMR spectrum of 9,9-dimethyl-12-(2-methoxyphenyl)-8,9,10,12-tetrahydrobenzo[a]xanthen-11-one (4j), in chloroform-d

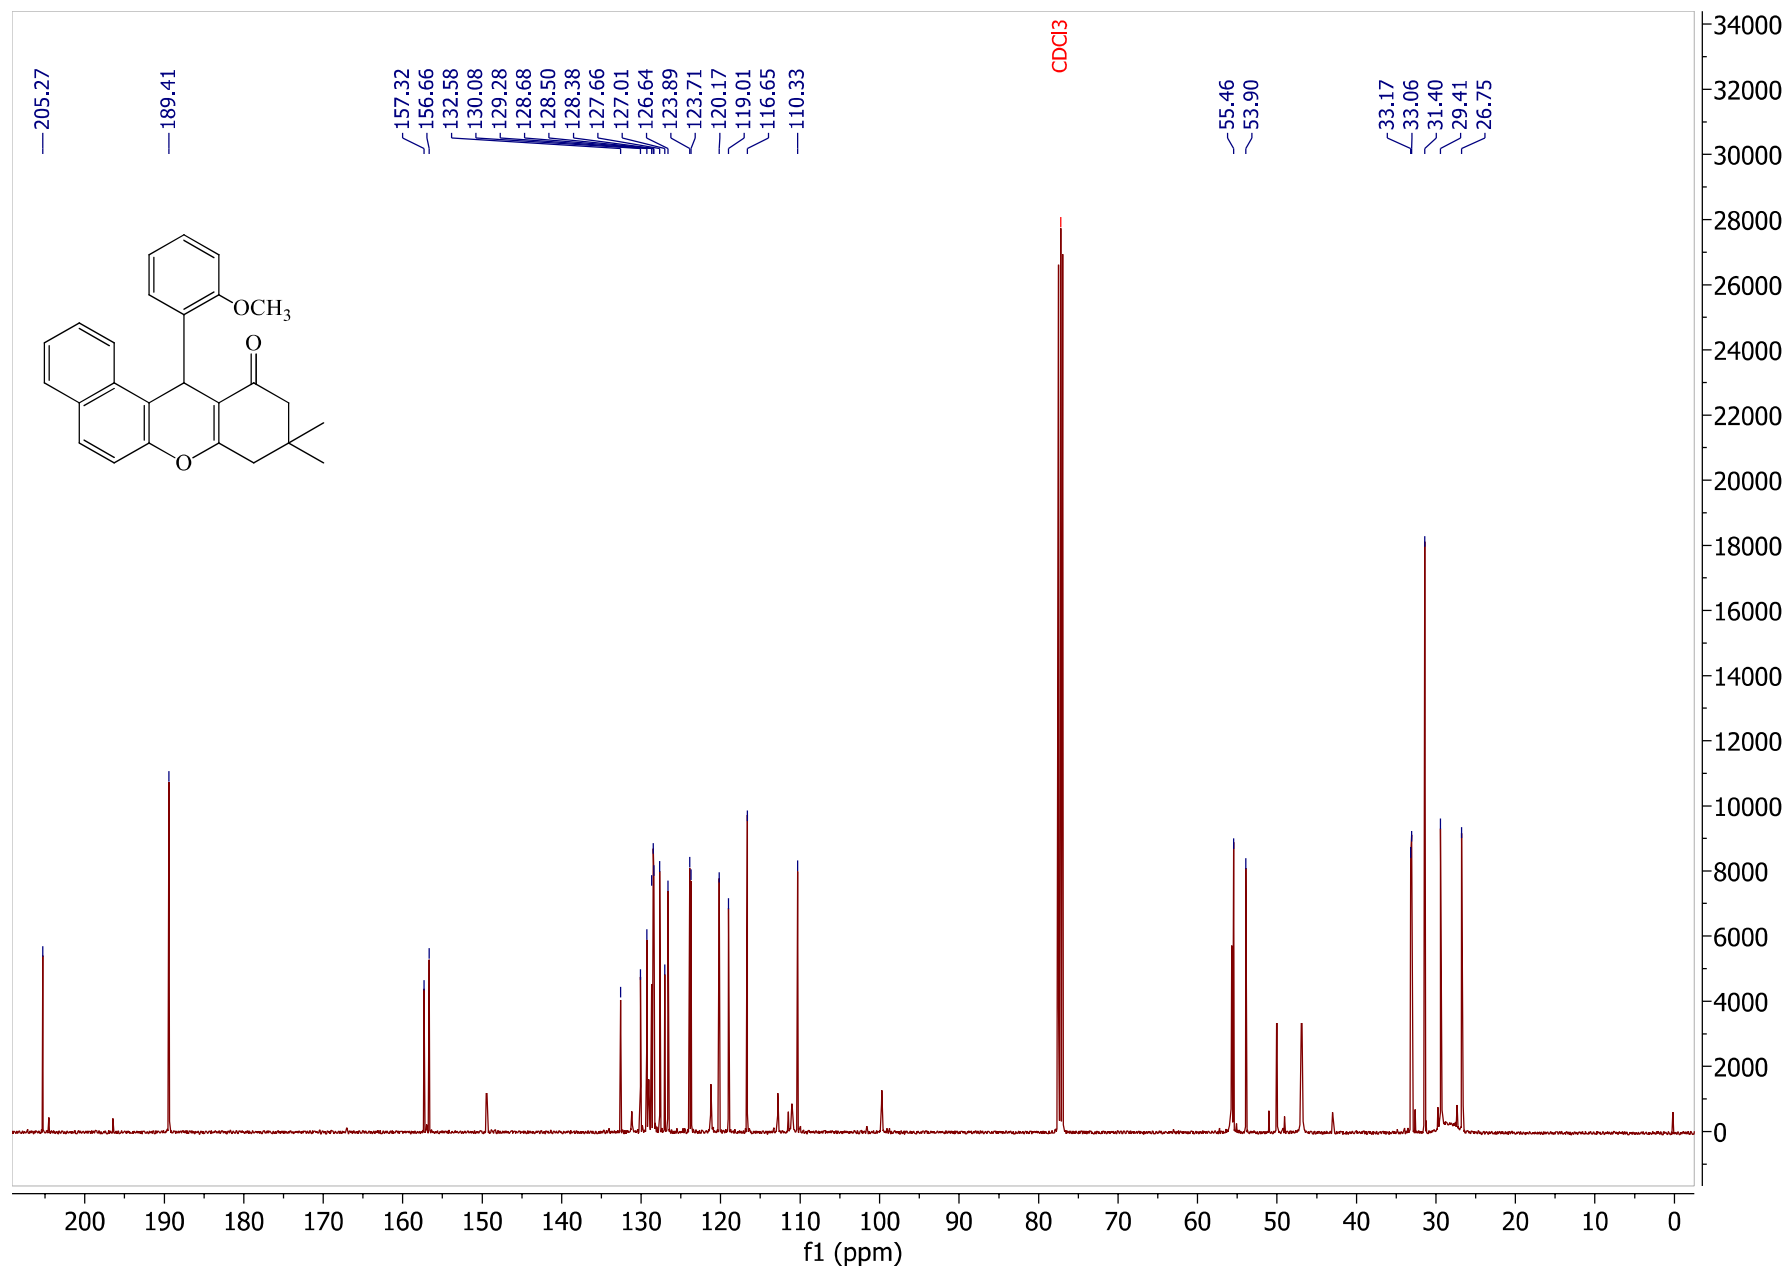

Figure S27 - <sup>13</sup>C-NMR spectrum of 9,9-dimethyl-12-(2-methoxyphenyl)-8,9,10,12-tetrahydrobenzo[a]xanthen-11-one (4j), in chloroform-d

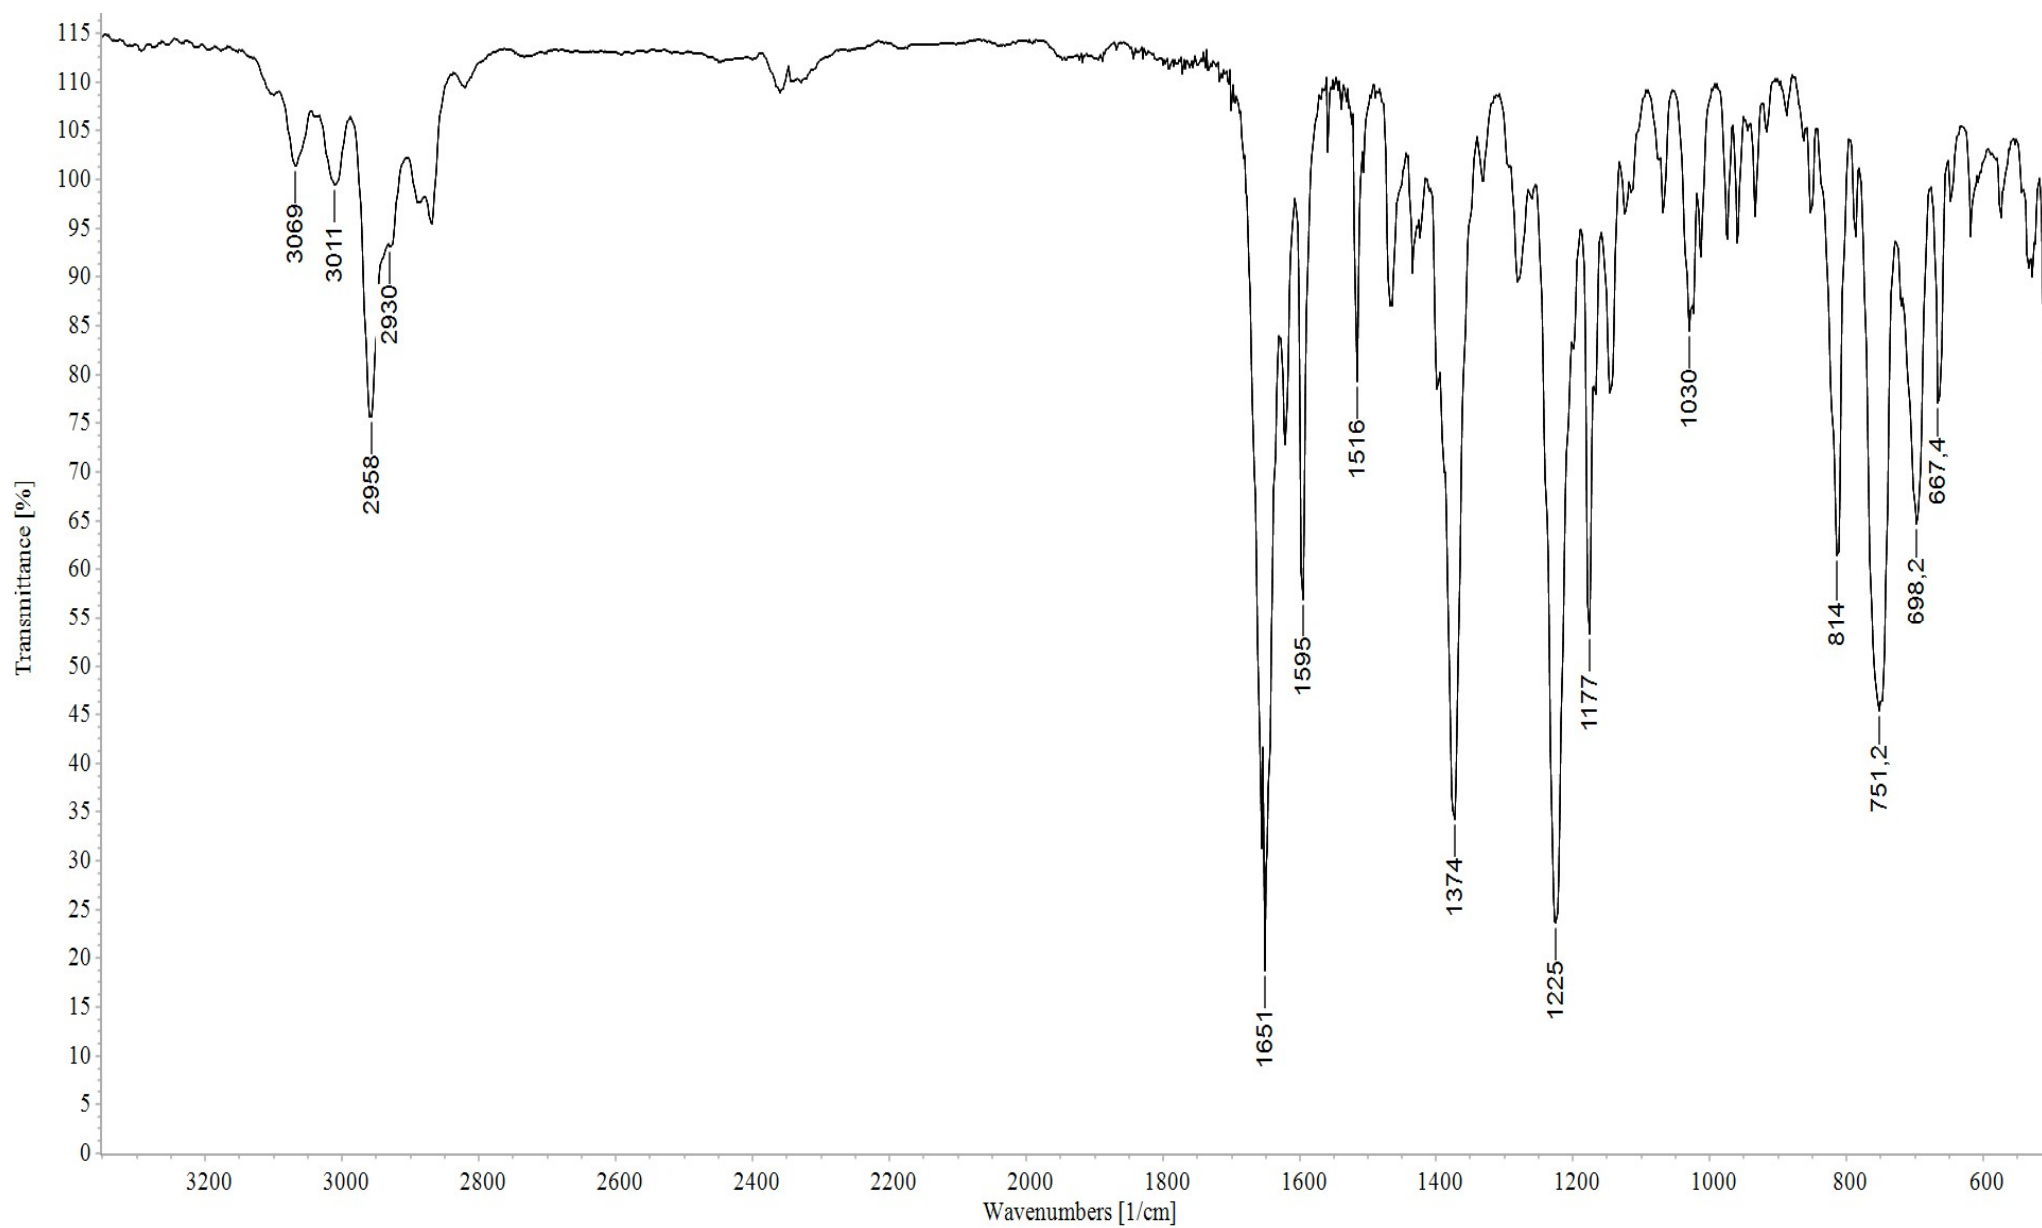

Figure S28 - FT-IR spectrum of 9,9-dimethyl-12-(furan-2-yl)-8,9,10,12-tetrahydrobenzo[a]xanthen-11-one (4k), NaCl



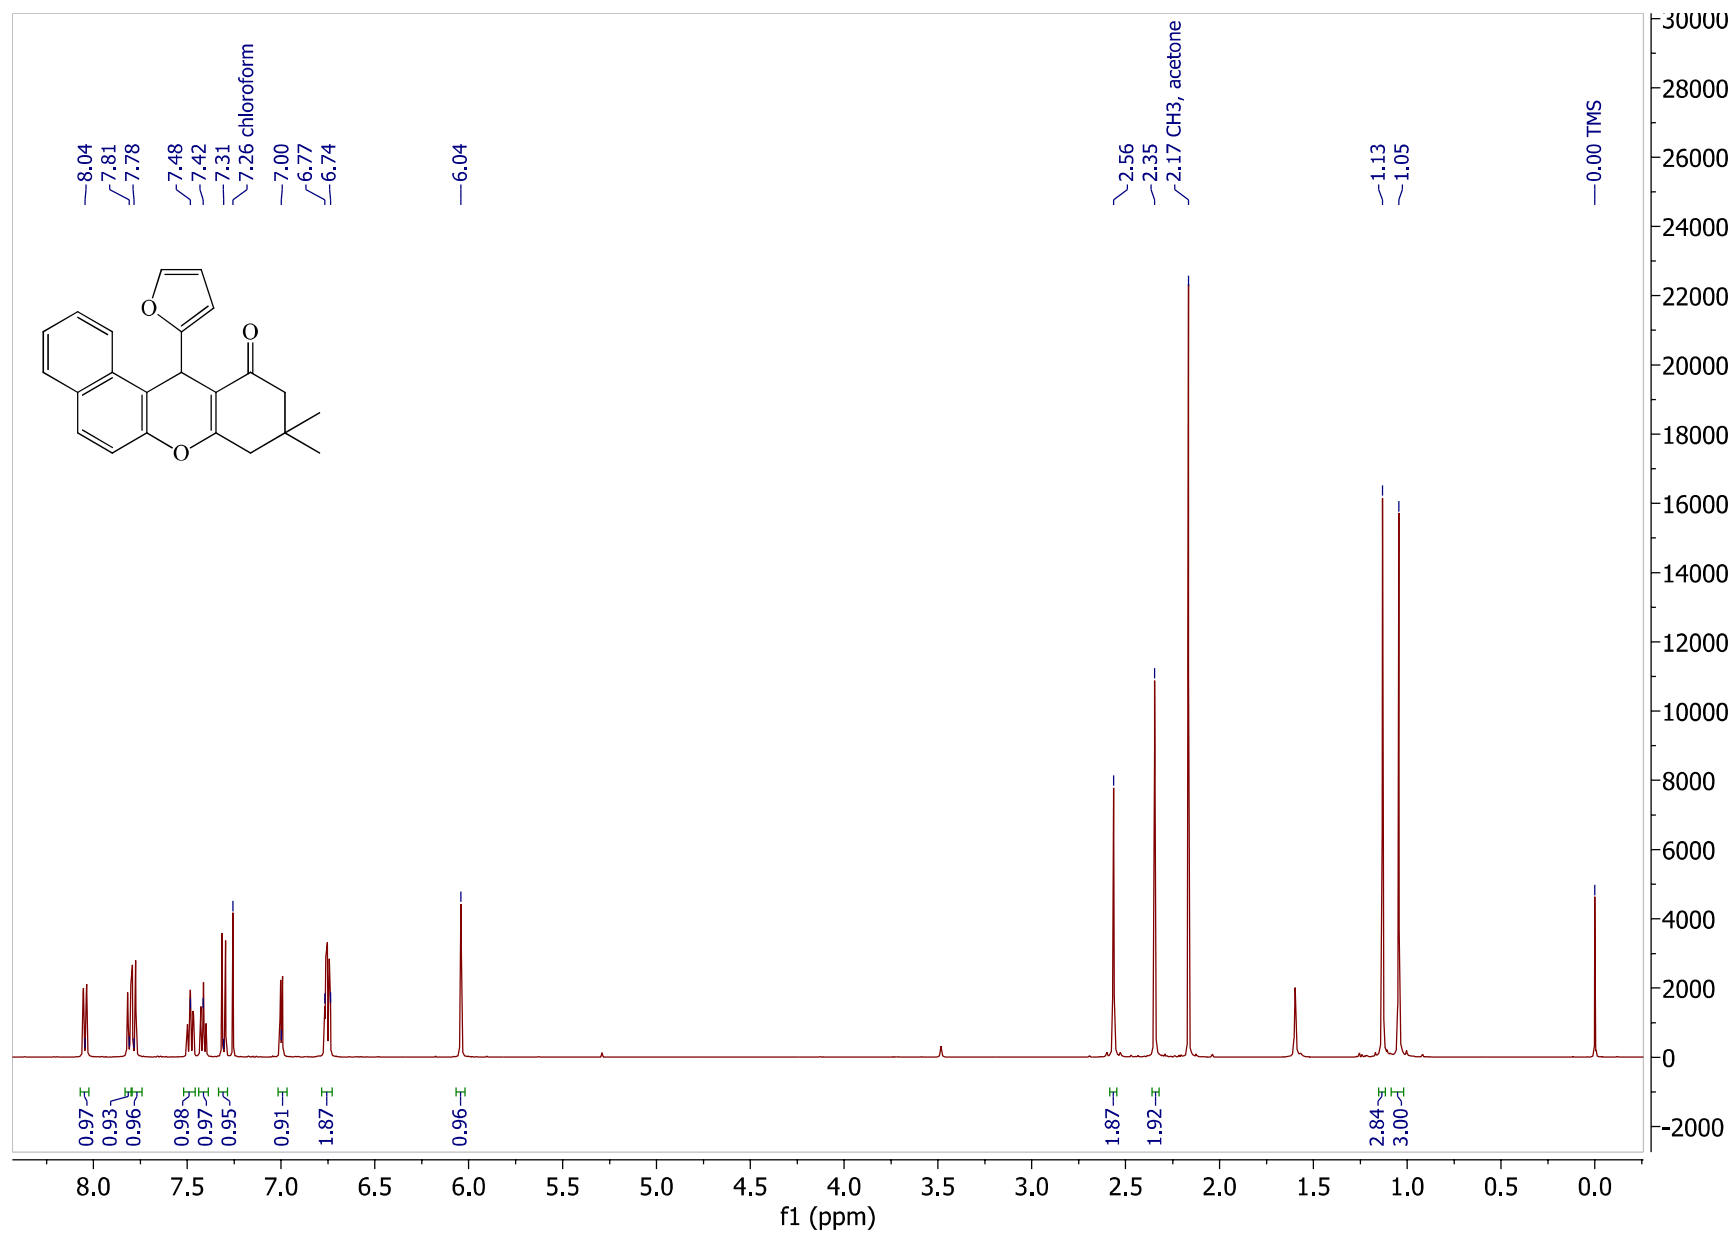

Figure S29 -  $^1\text{H}$ -NMR spectrum of 9,9-dimethyl-12-(furan-2-yl)-8,9,10,12-tetrahydrobenzo[a]xanthen-11-one (4k), in chloroform-d

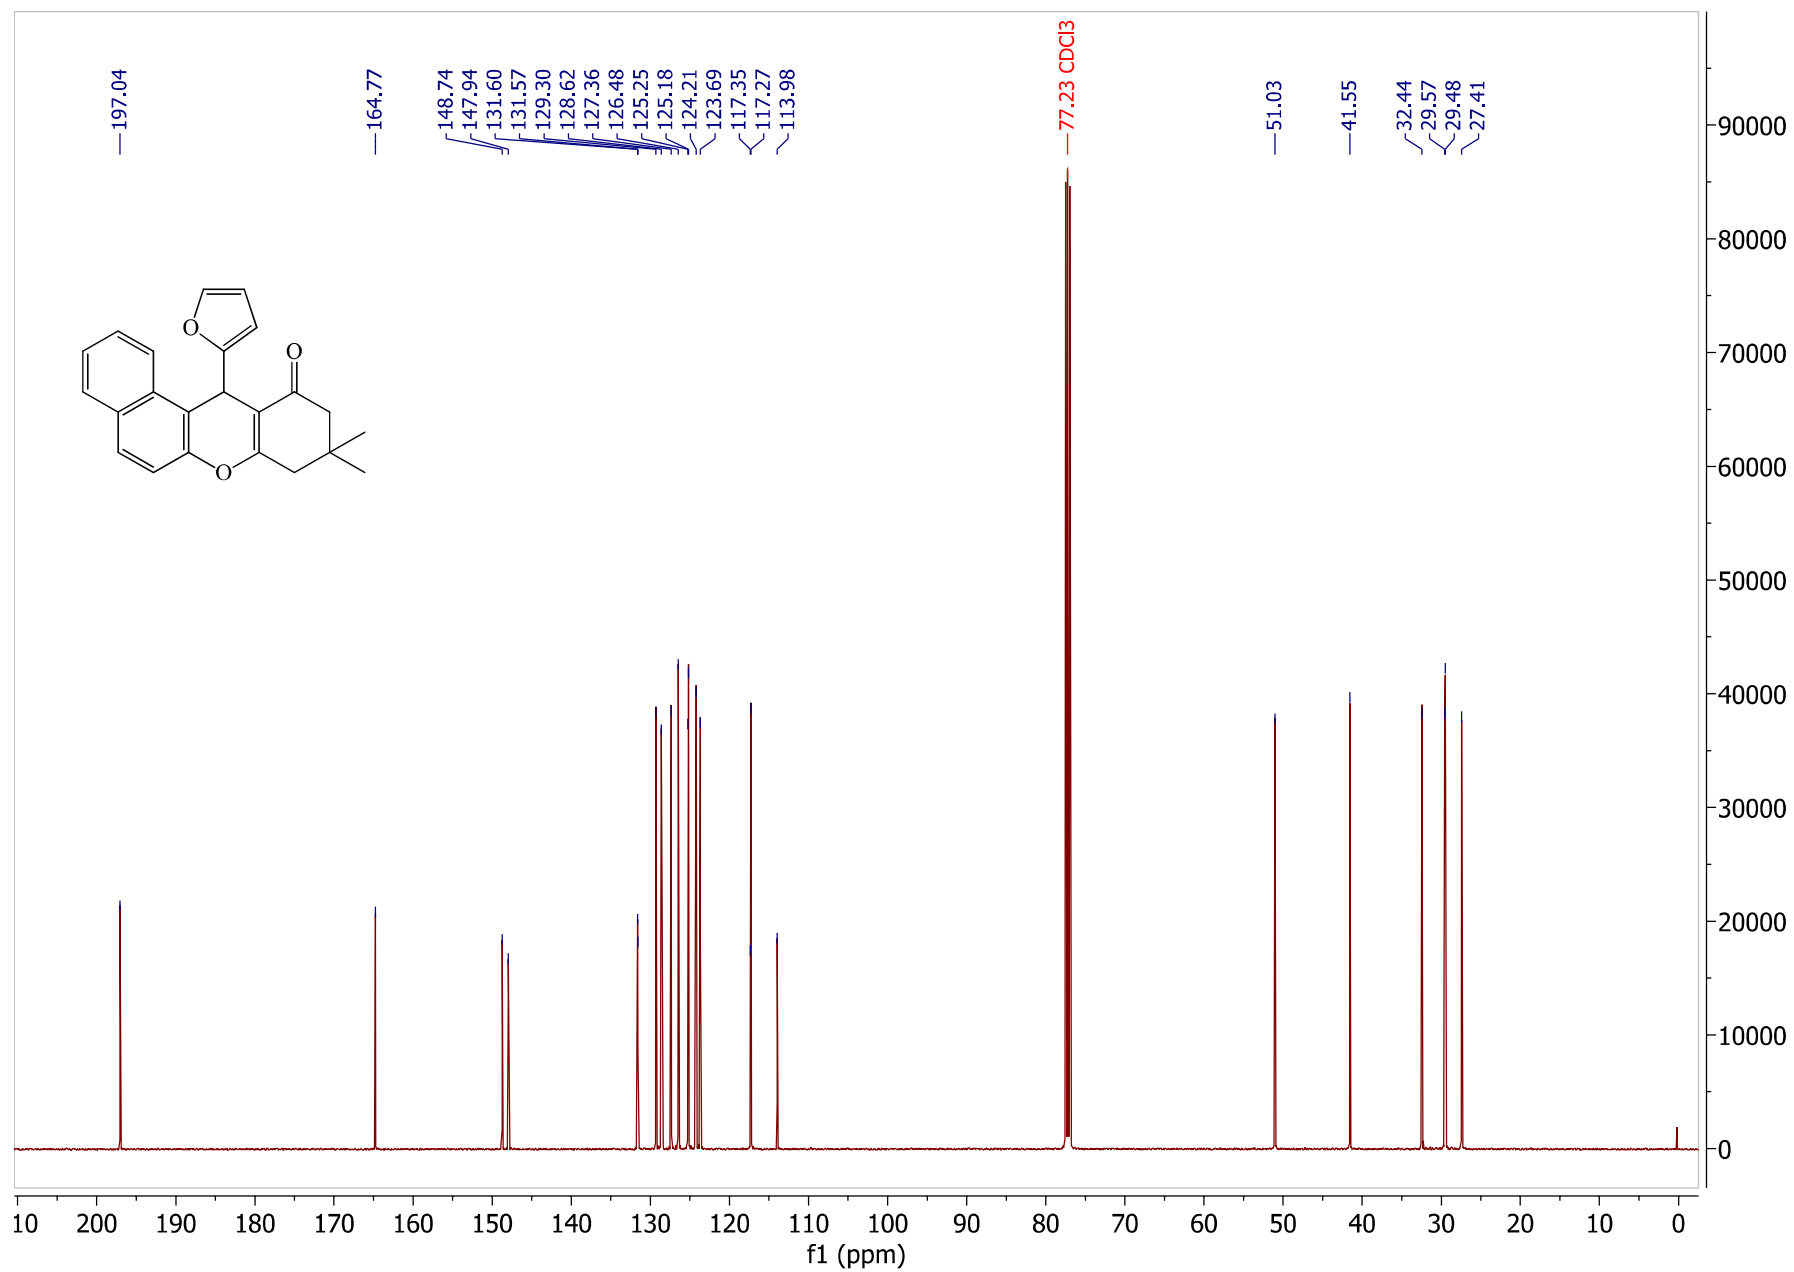

Figure S30 - <sup>13</sup>C-NMR spectrum of 9,9-dimethyl-12-(furan-2-yl)-8,9,10,12-tetrahydrobenzo[a]xanthen-11-one (4k), in chloroform-d

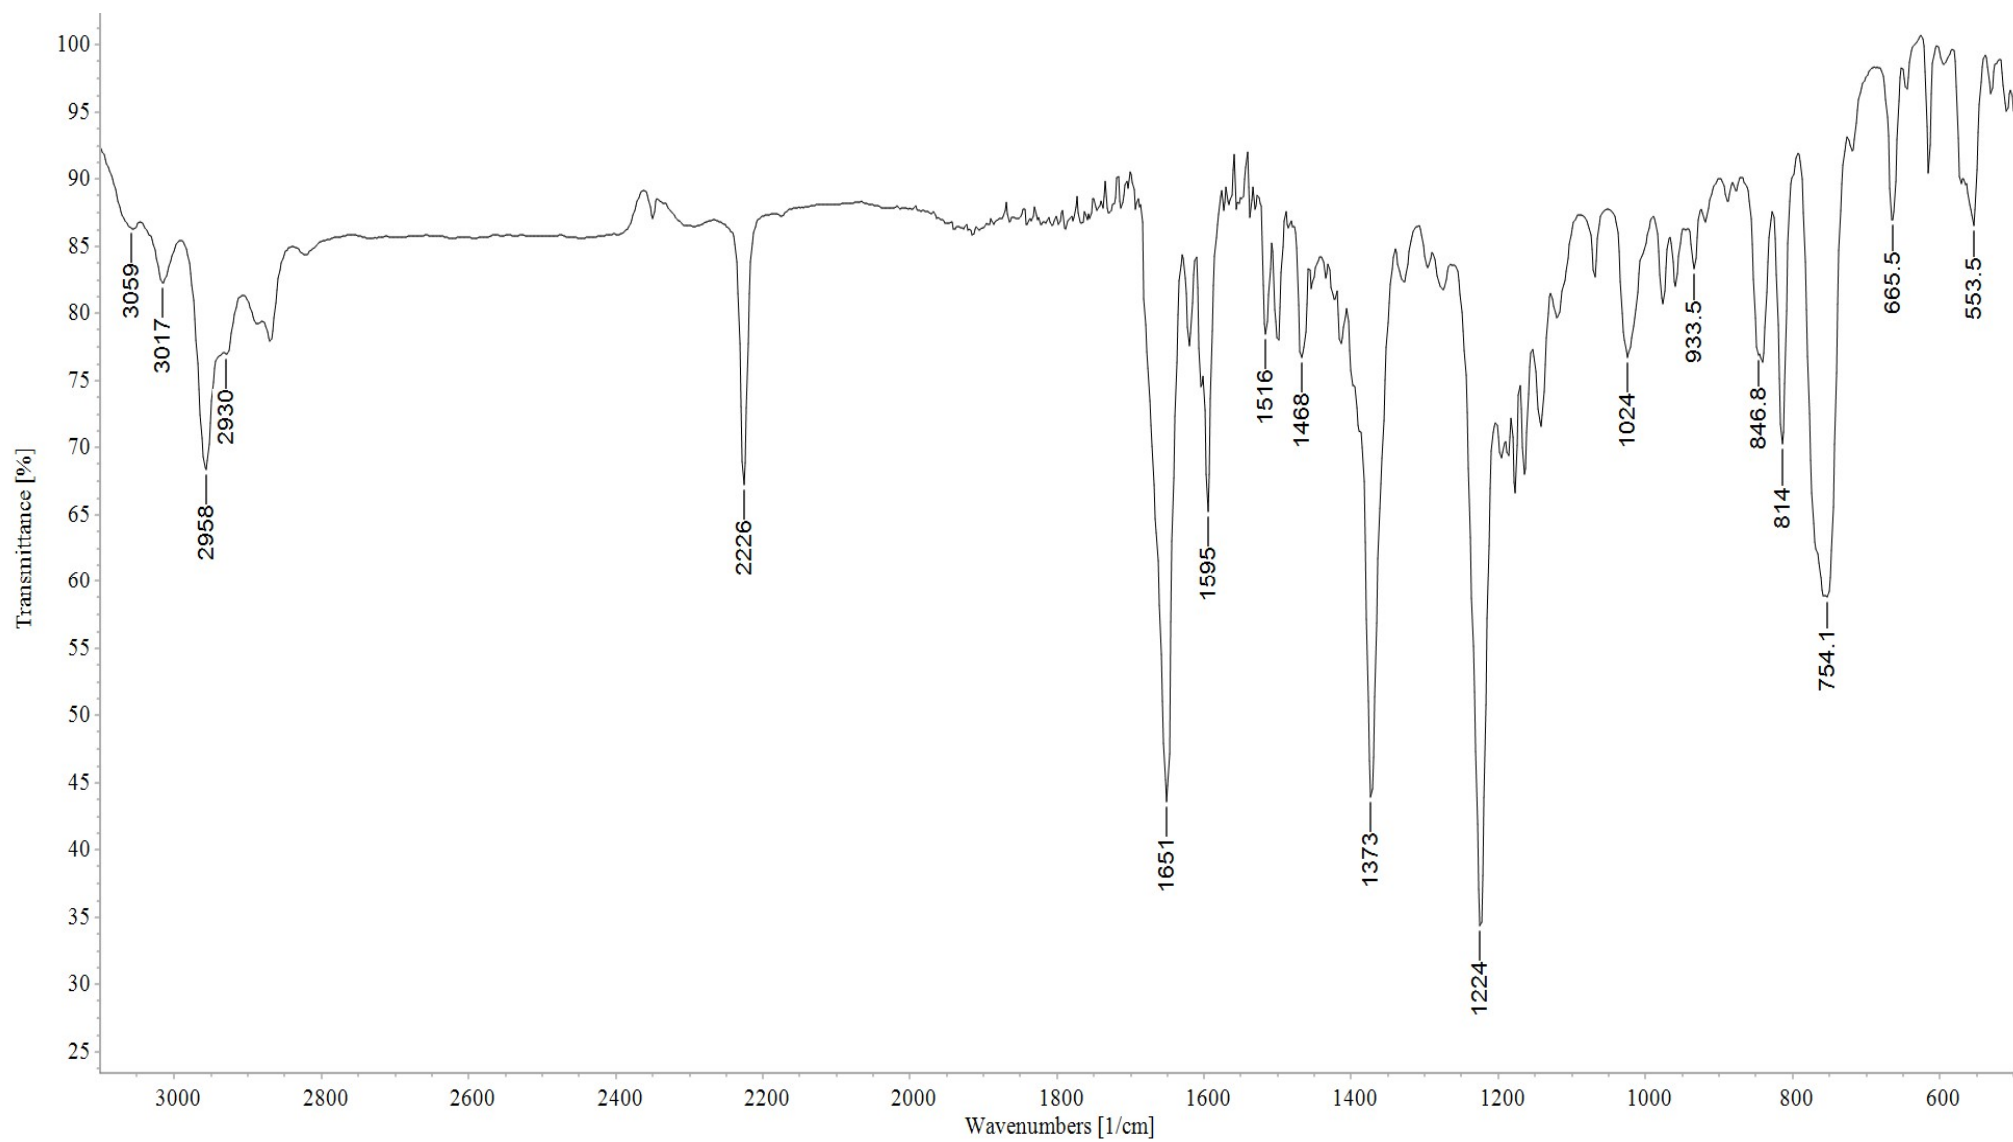

Figure S31 - FT-IR spectrum of 9,9-dimethyl-12-(4-cyanophenyl)-8,9,10,12-tetrahydrobenzo[a]xanthen-11-one (4I), NaCl

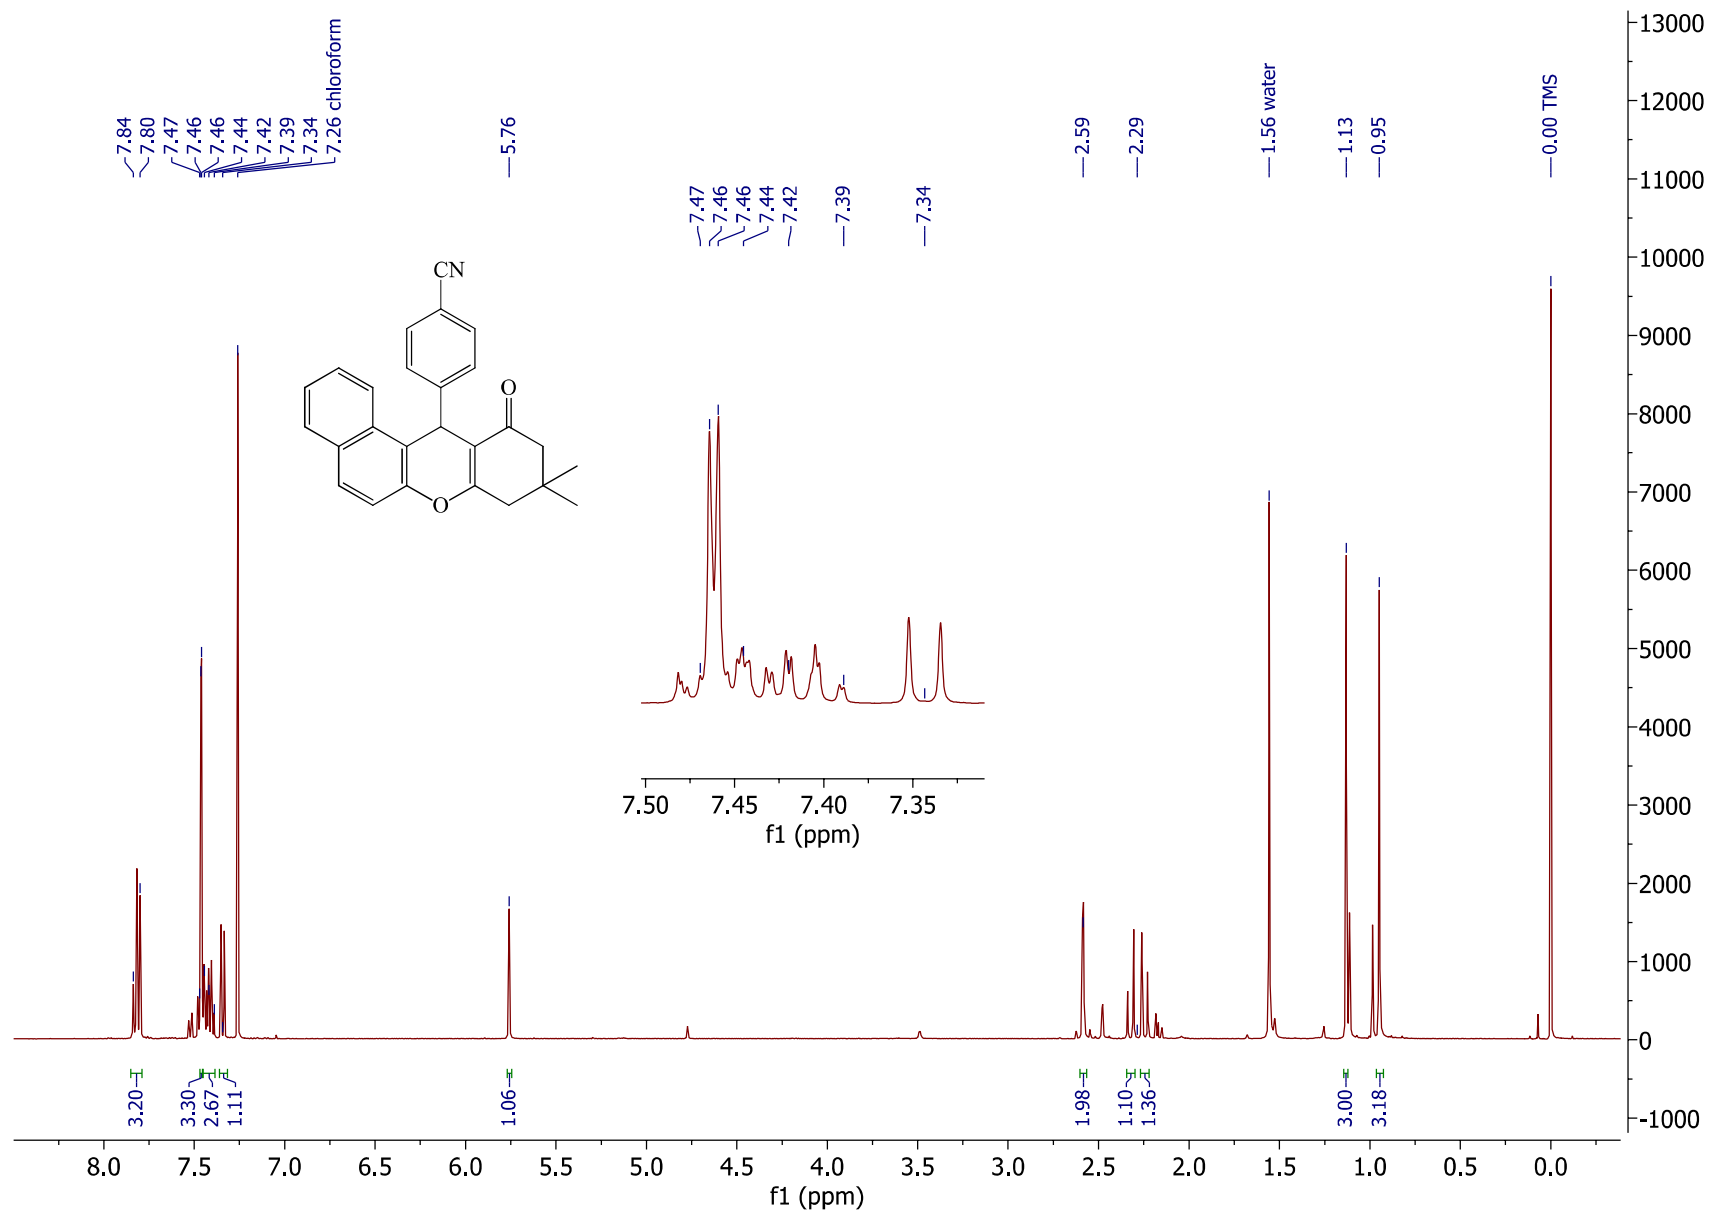

Figure S32 -  $^1\text{H}$ -NMR spectrum of 9,9-dimethyl-12-(4-cyanophenyl)-8,9,10,12-tetrahydrobenzo[a]xanthen-11-one (4l), in  $\text{CDCl}_3$ -d

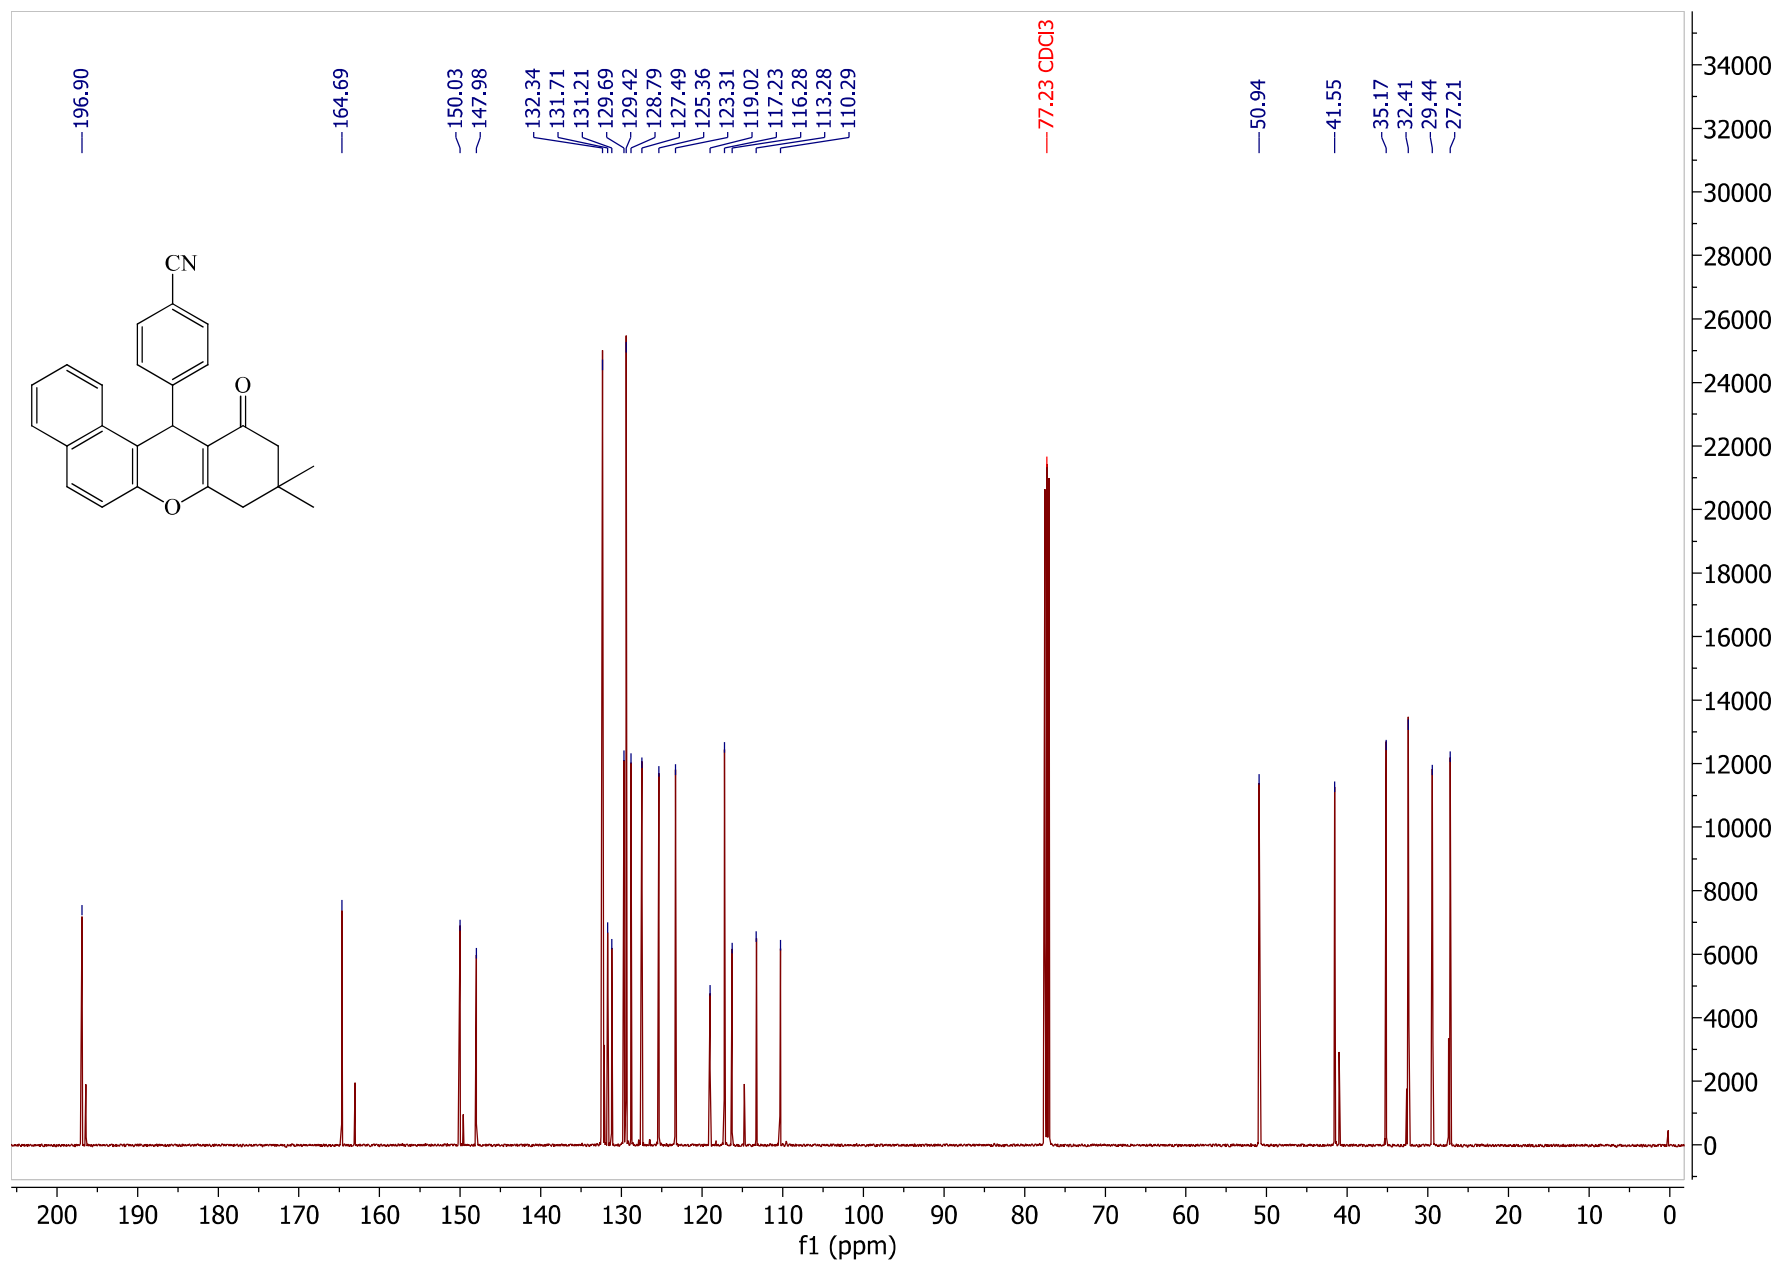

Figure S33 - <sup>13</sup>C-NMR spectrum of 9,9-dimethyl-12-(4-cyanophenyl)-8,9,10,12-tetrahydrobenzo[a]xanthen-11-one (4l), in chloroform-d

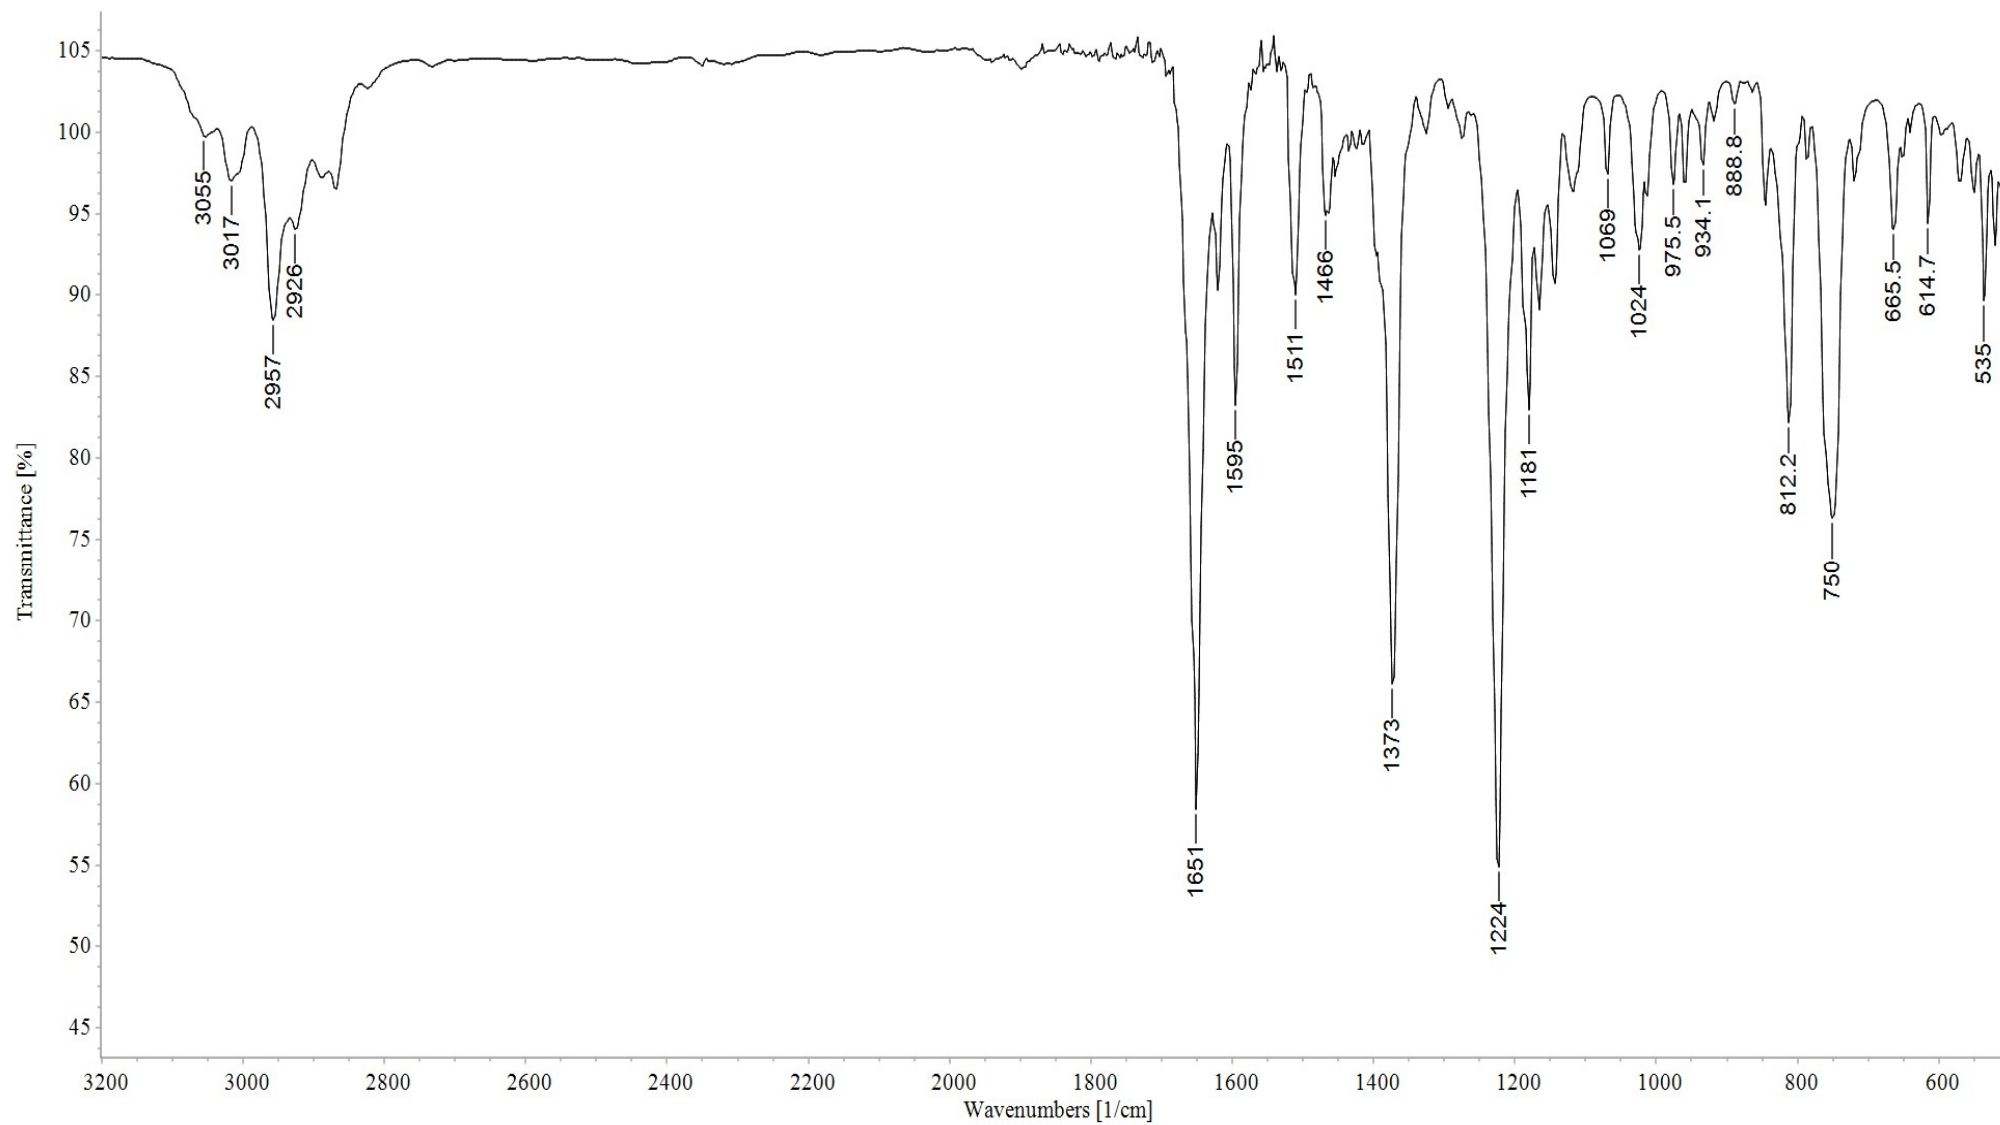

Figure S34 - FT-IR spectrum of 9,9-dimethyl-12-(4-methylphenyl)-8,9,10,12-tetrahydrobenzo[a]xanthen-11-one (4m), NaCl

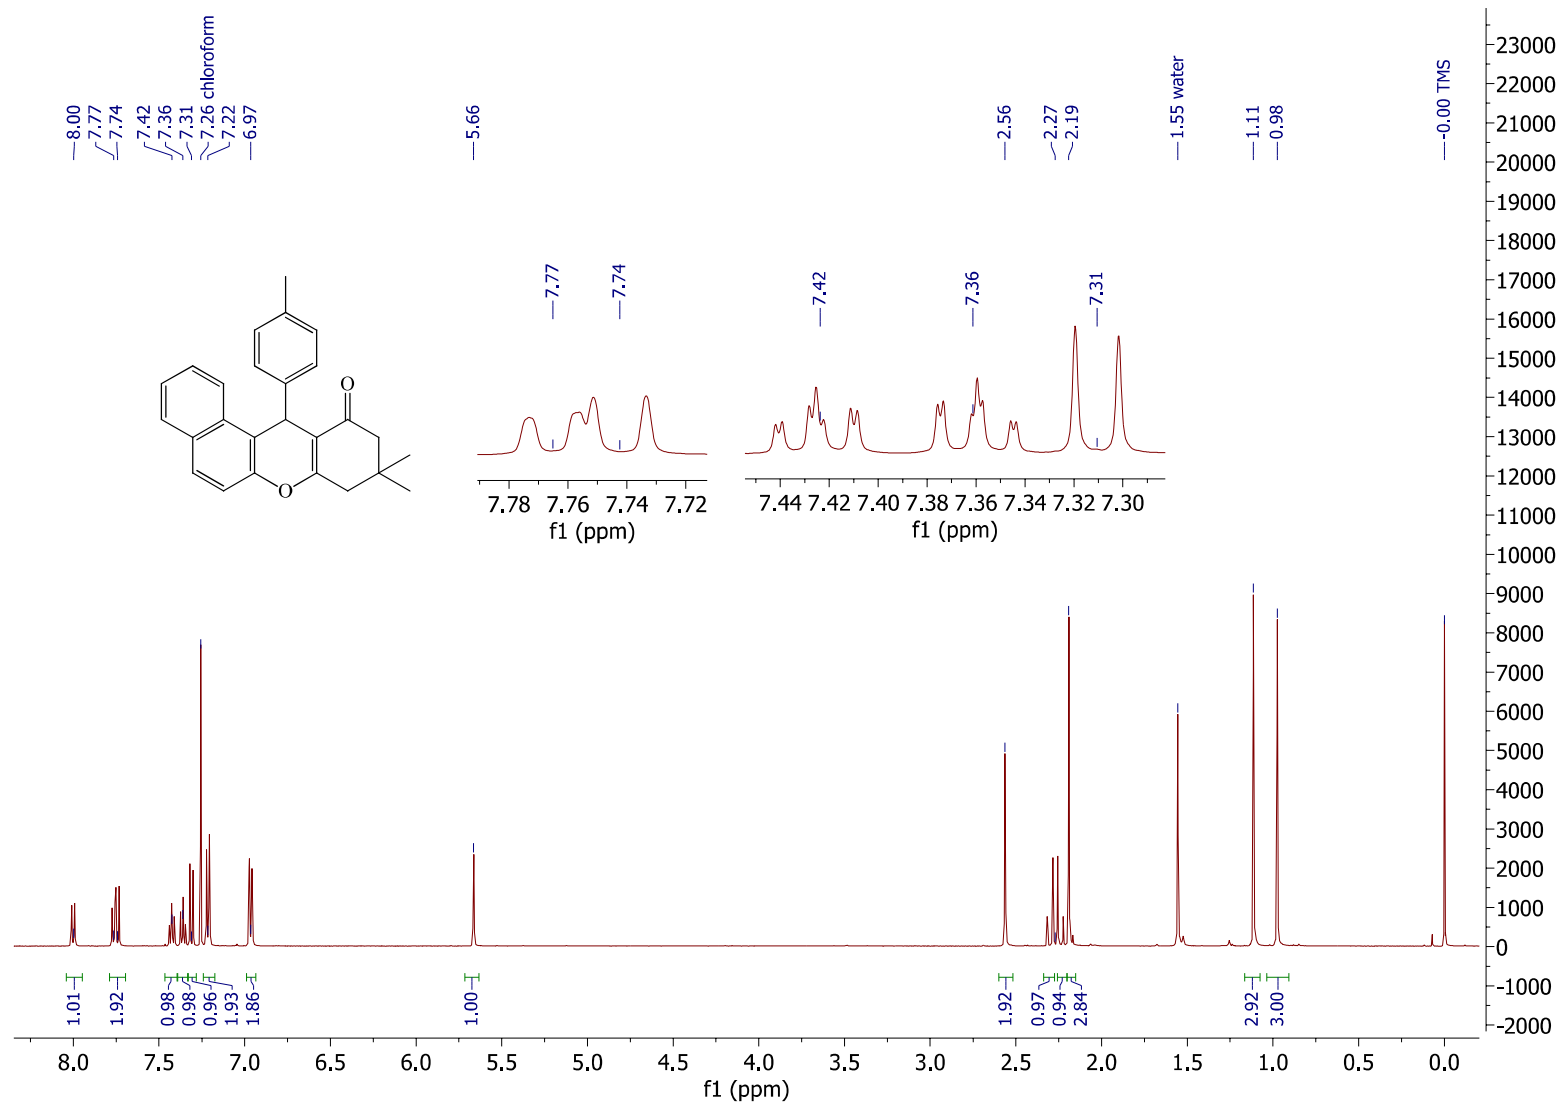

Figure S35 - <sup>1</sup>H-NMR spectrum of 9,9-dimethyl-12-(4-methylphenyl)-8,9,10,12-tetrahydrobenzo[a]xanthen-11-one (4m), in chloroform-d

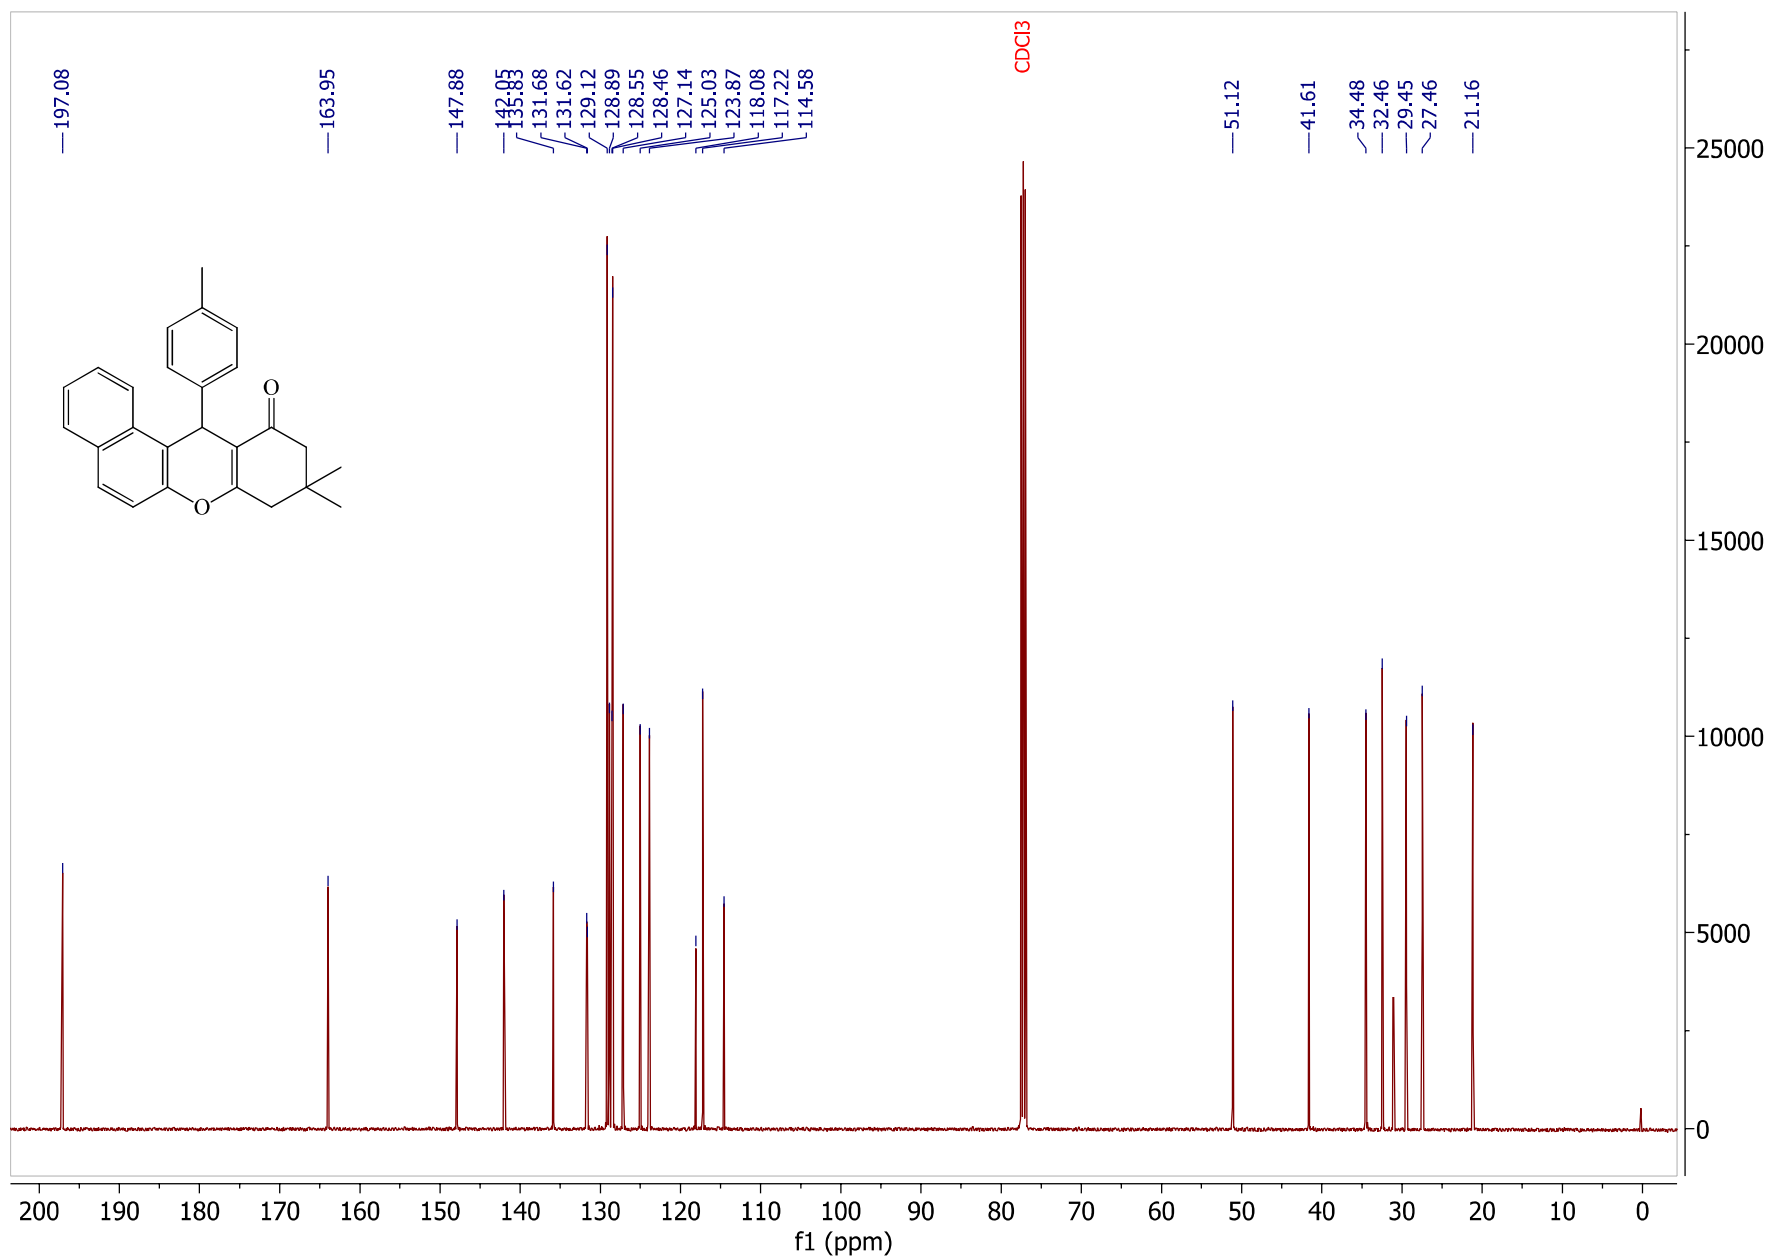

Figure S36 - <sup>13</sup>C-NMR spectrum of 9,9-dimethyl-12-(4-methylphenyl)-8,9,10,12-tetrahydrobenzo[a]xanthen-11-one (4m), in chloroform-d



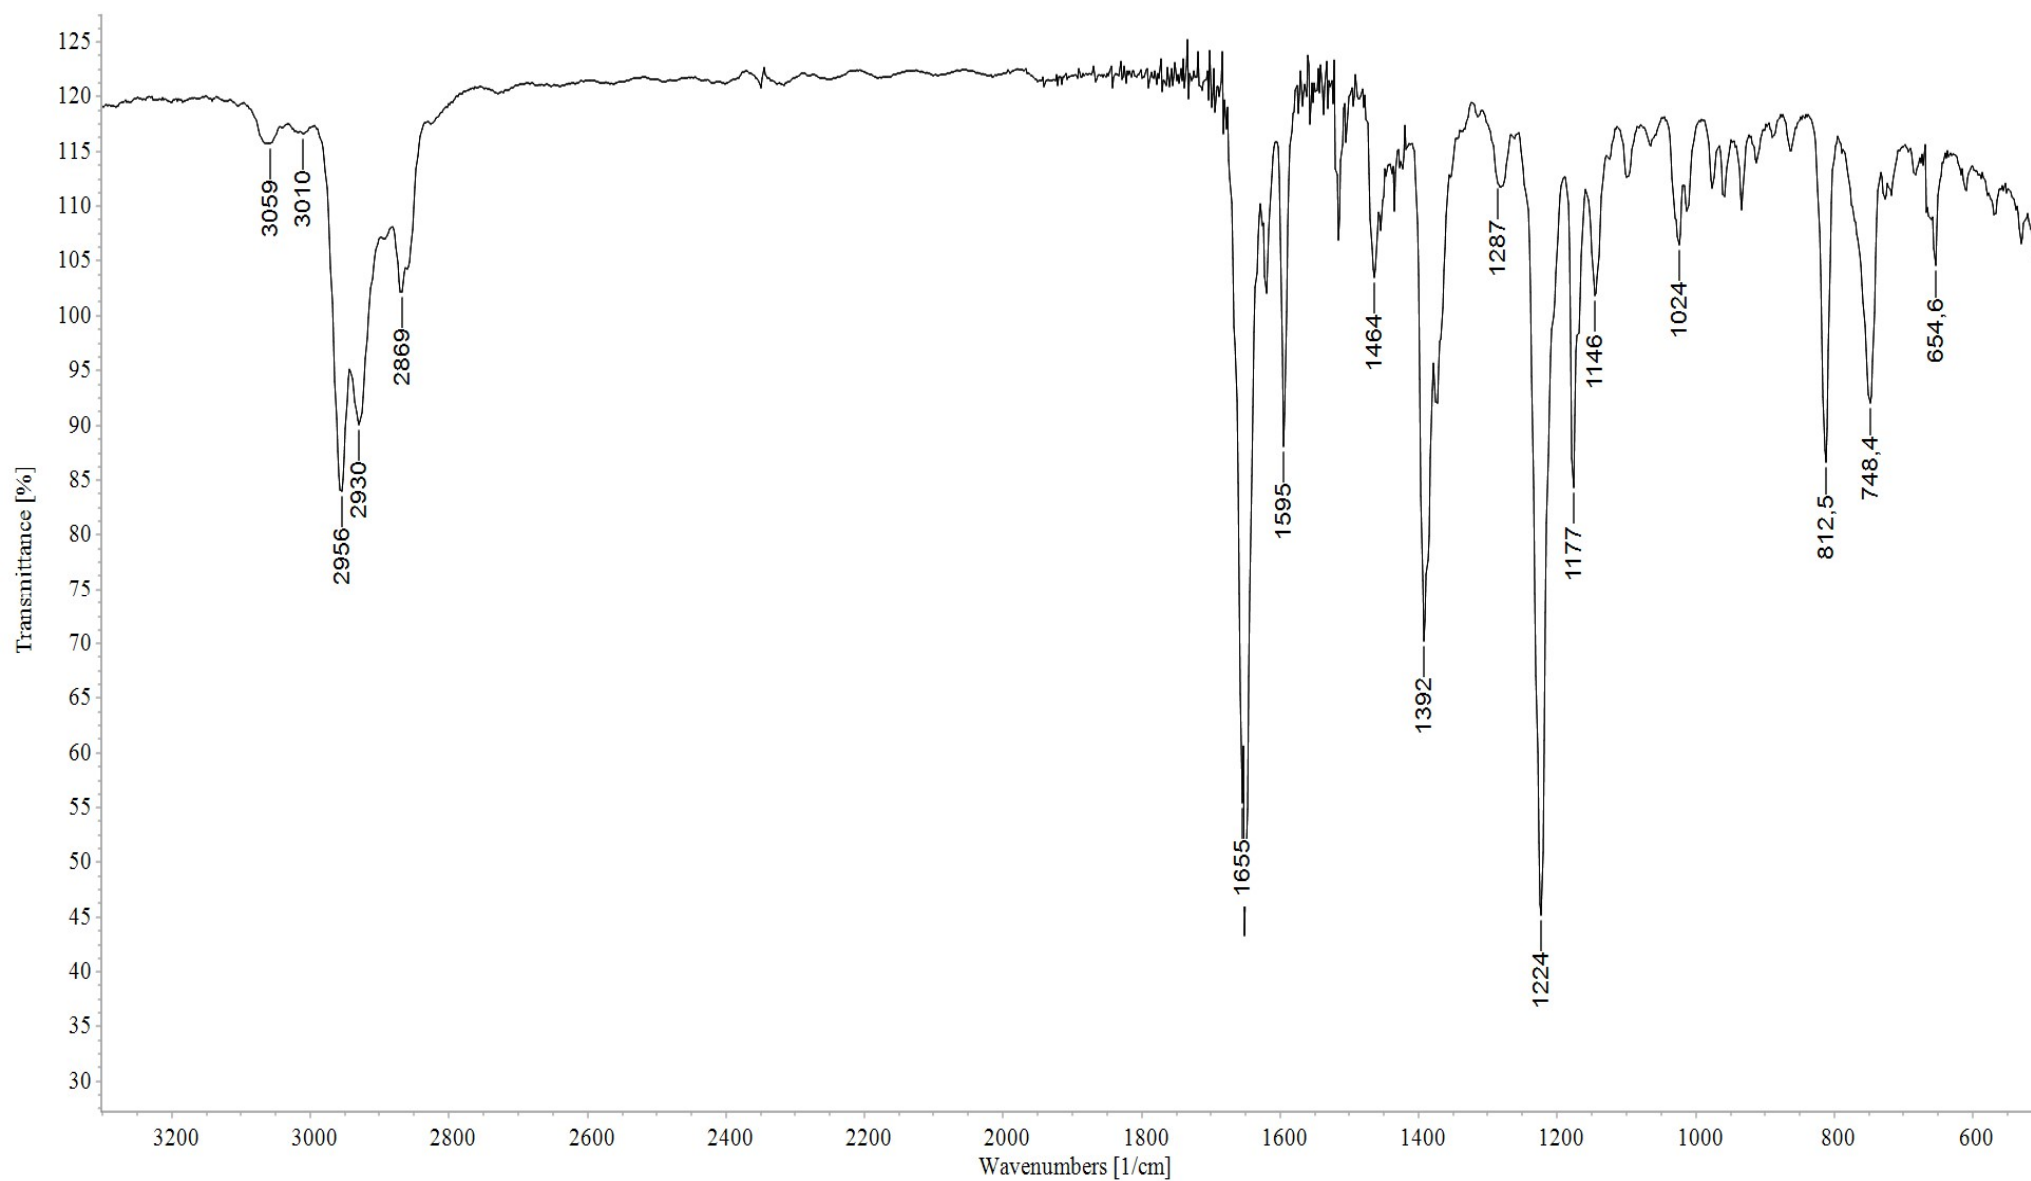

Figure S37 - FT-IR spectrum of 9,9-dimethyl-12-butyl-8,9,10,12-tetrahydrobenzo[a]xanthen-11-one (4n), NaCl

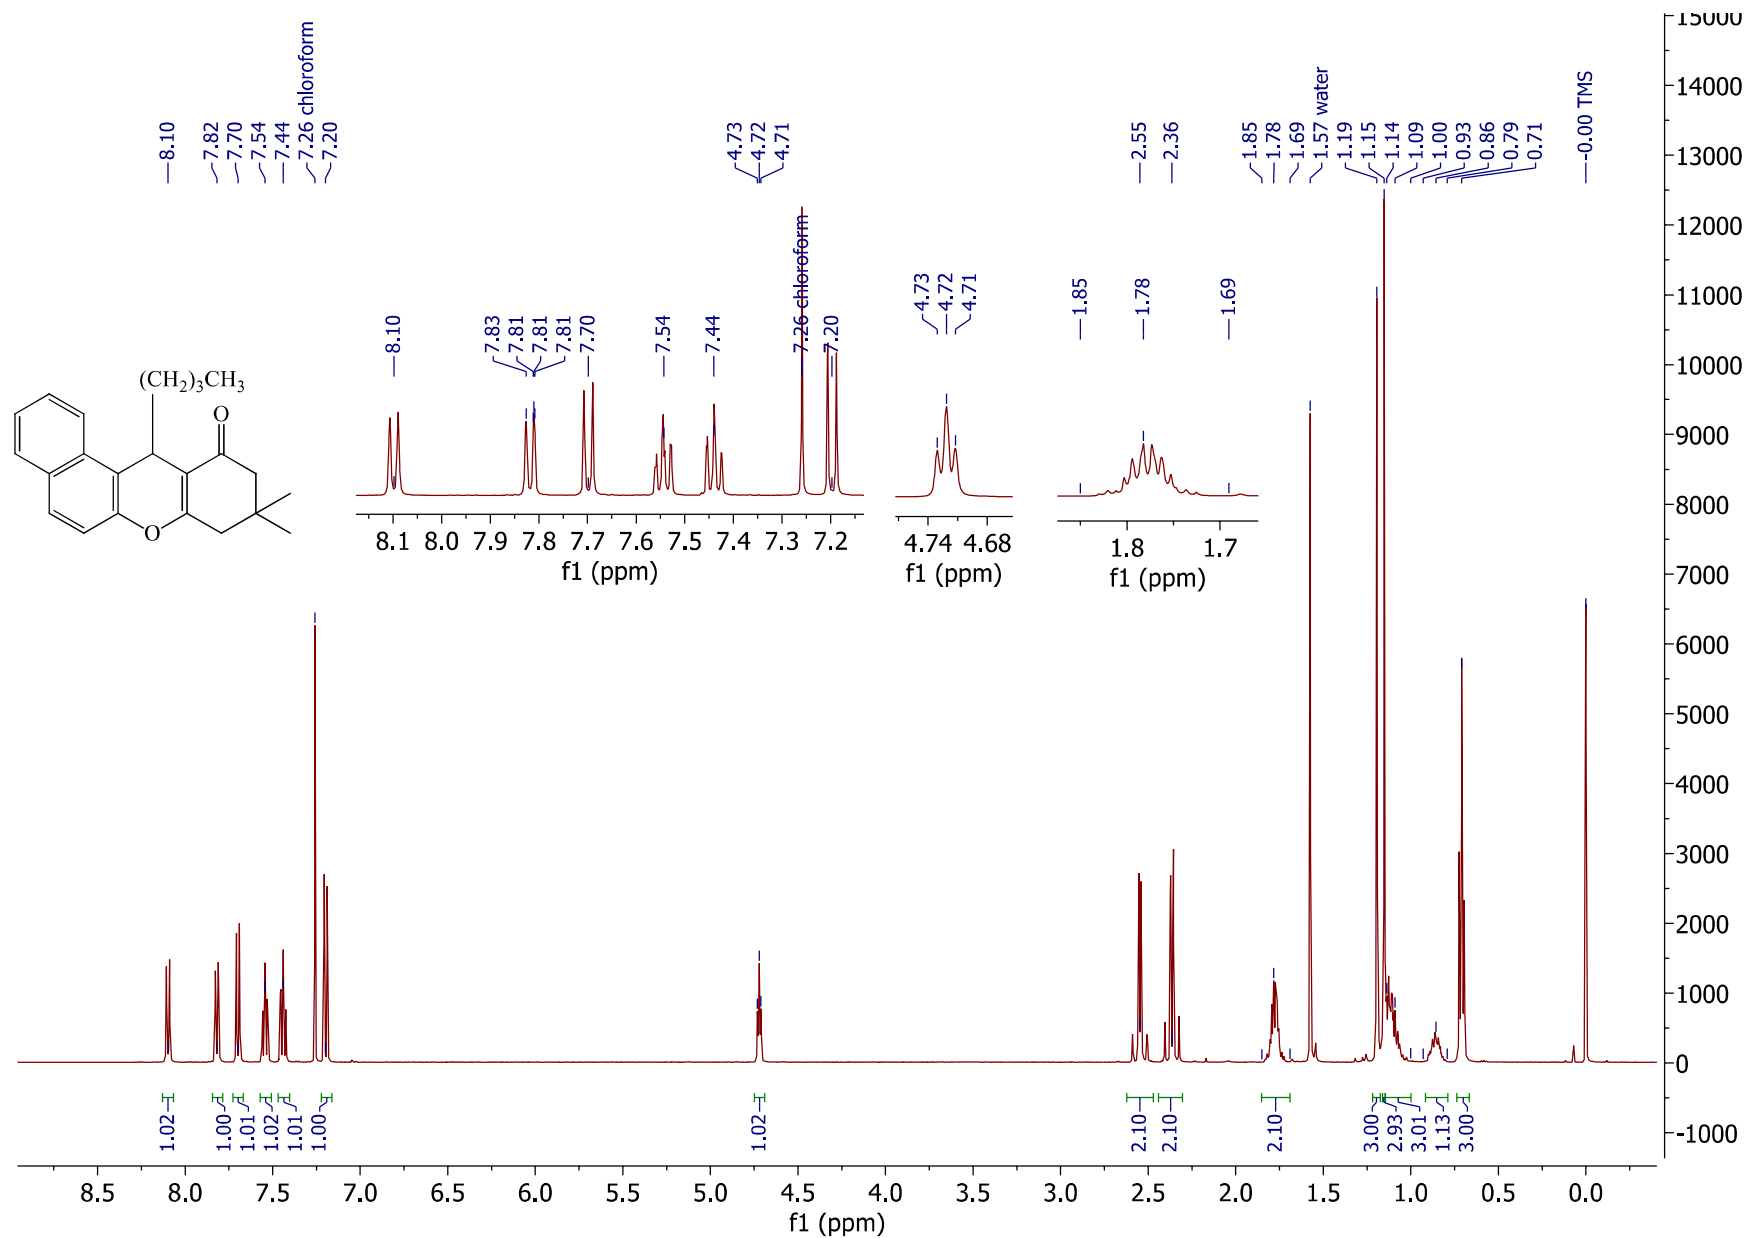

Figure S38 -  $^1\text{H}$ -NMR spectrum of 9,9-dimethyl-12-butyl-8,9,10,12-tetrahydrobenzo[a]xanthene-11-one (4n), in chloroform-d

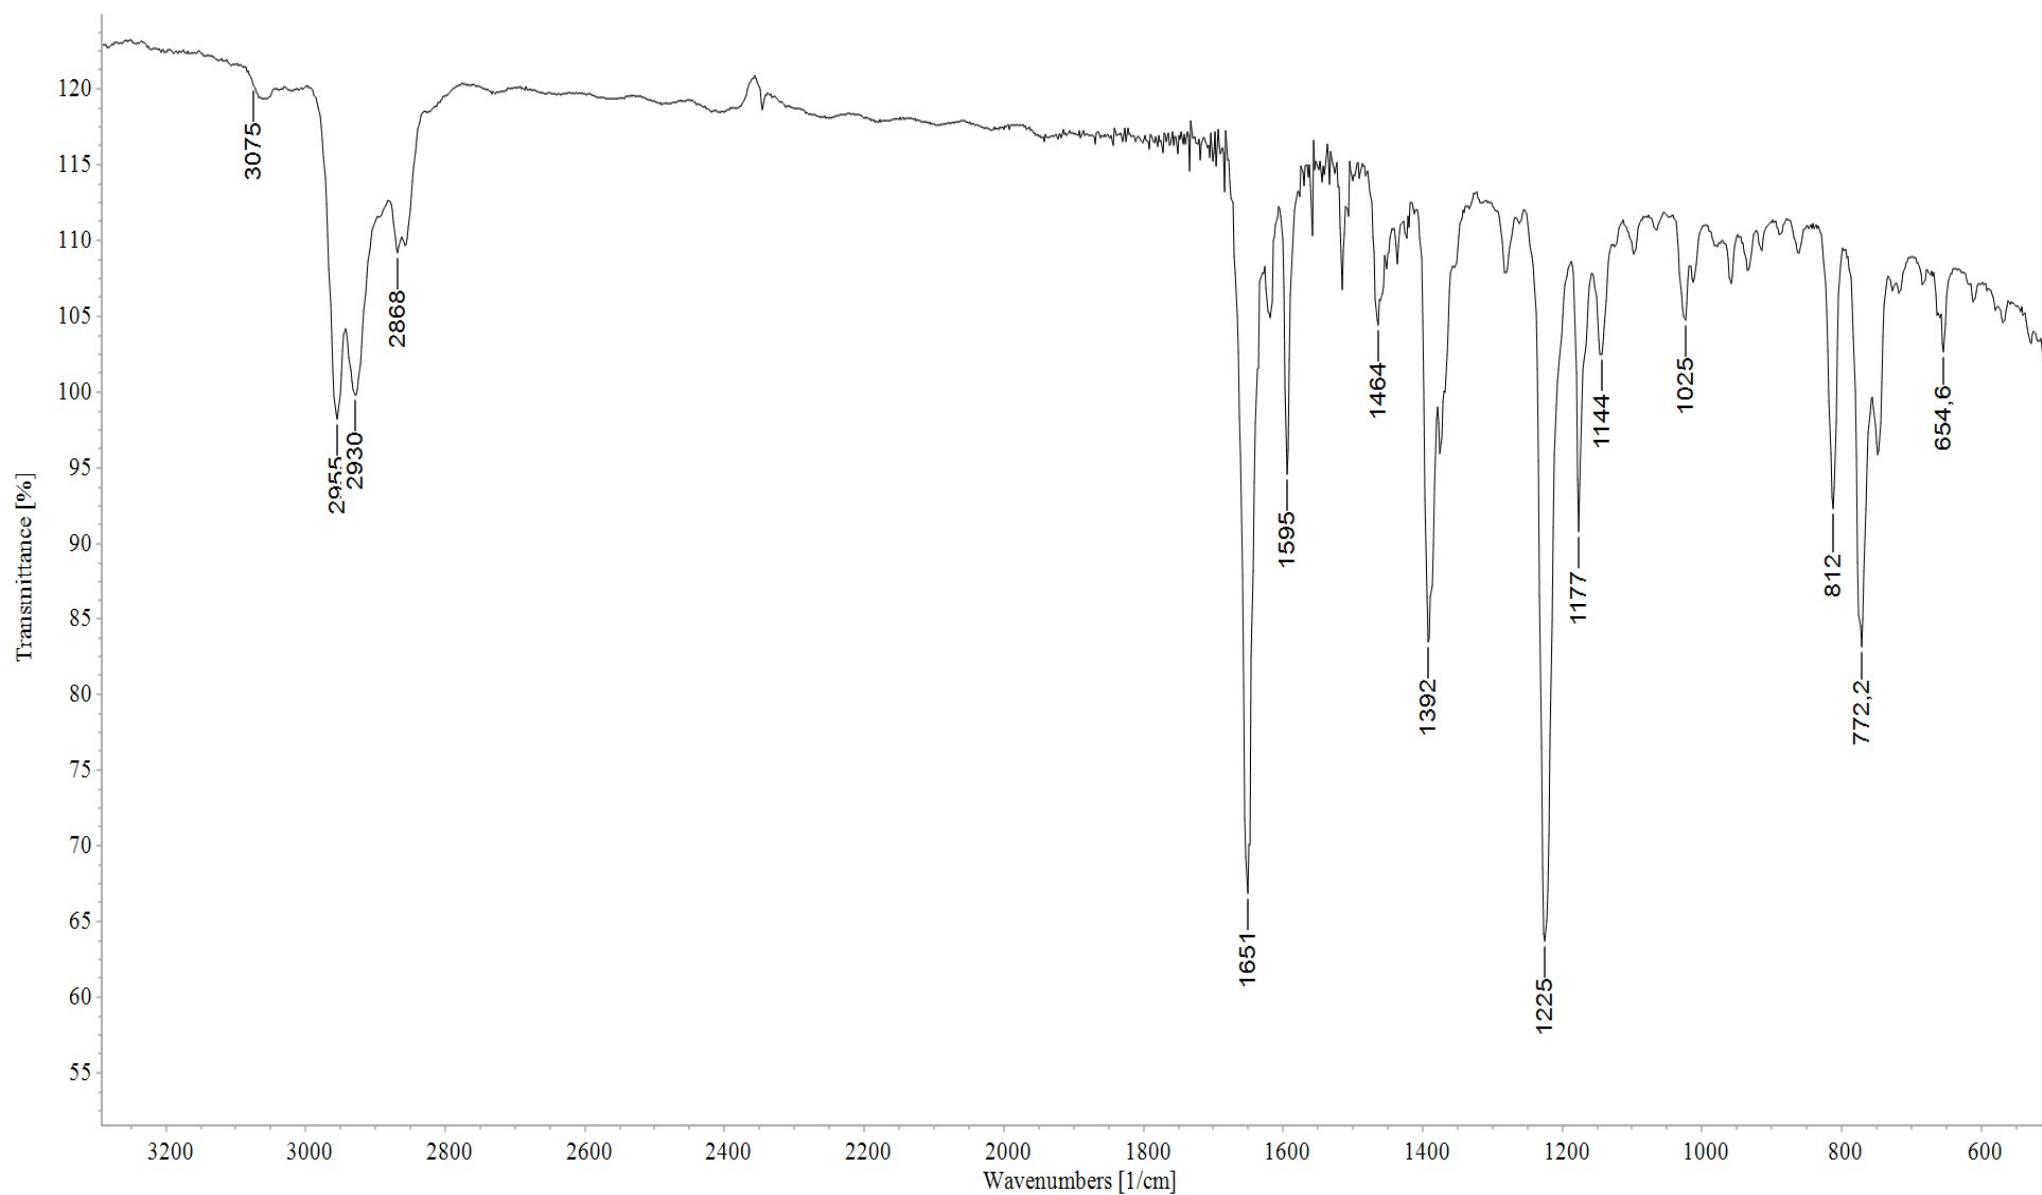

**Figure S39 - FT-IR spectrum of 9,9-dimethyl-12-pentyl-8,9,10,12-tetrahydrobenzo[a]xanthen-11-one (4o), NaCl**

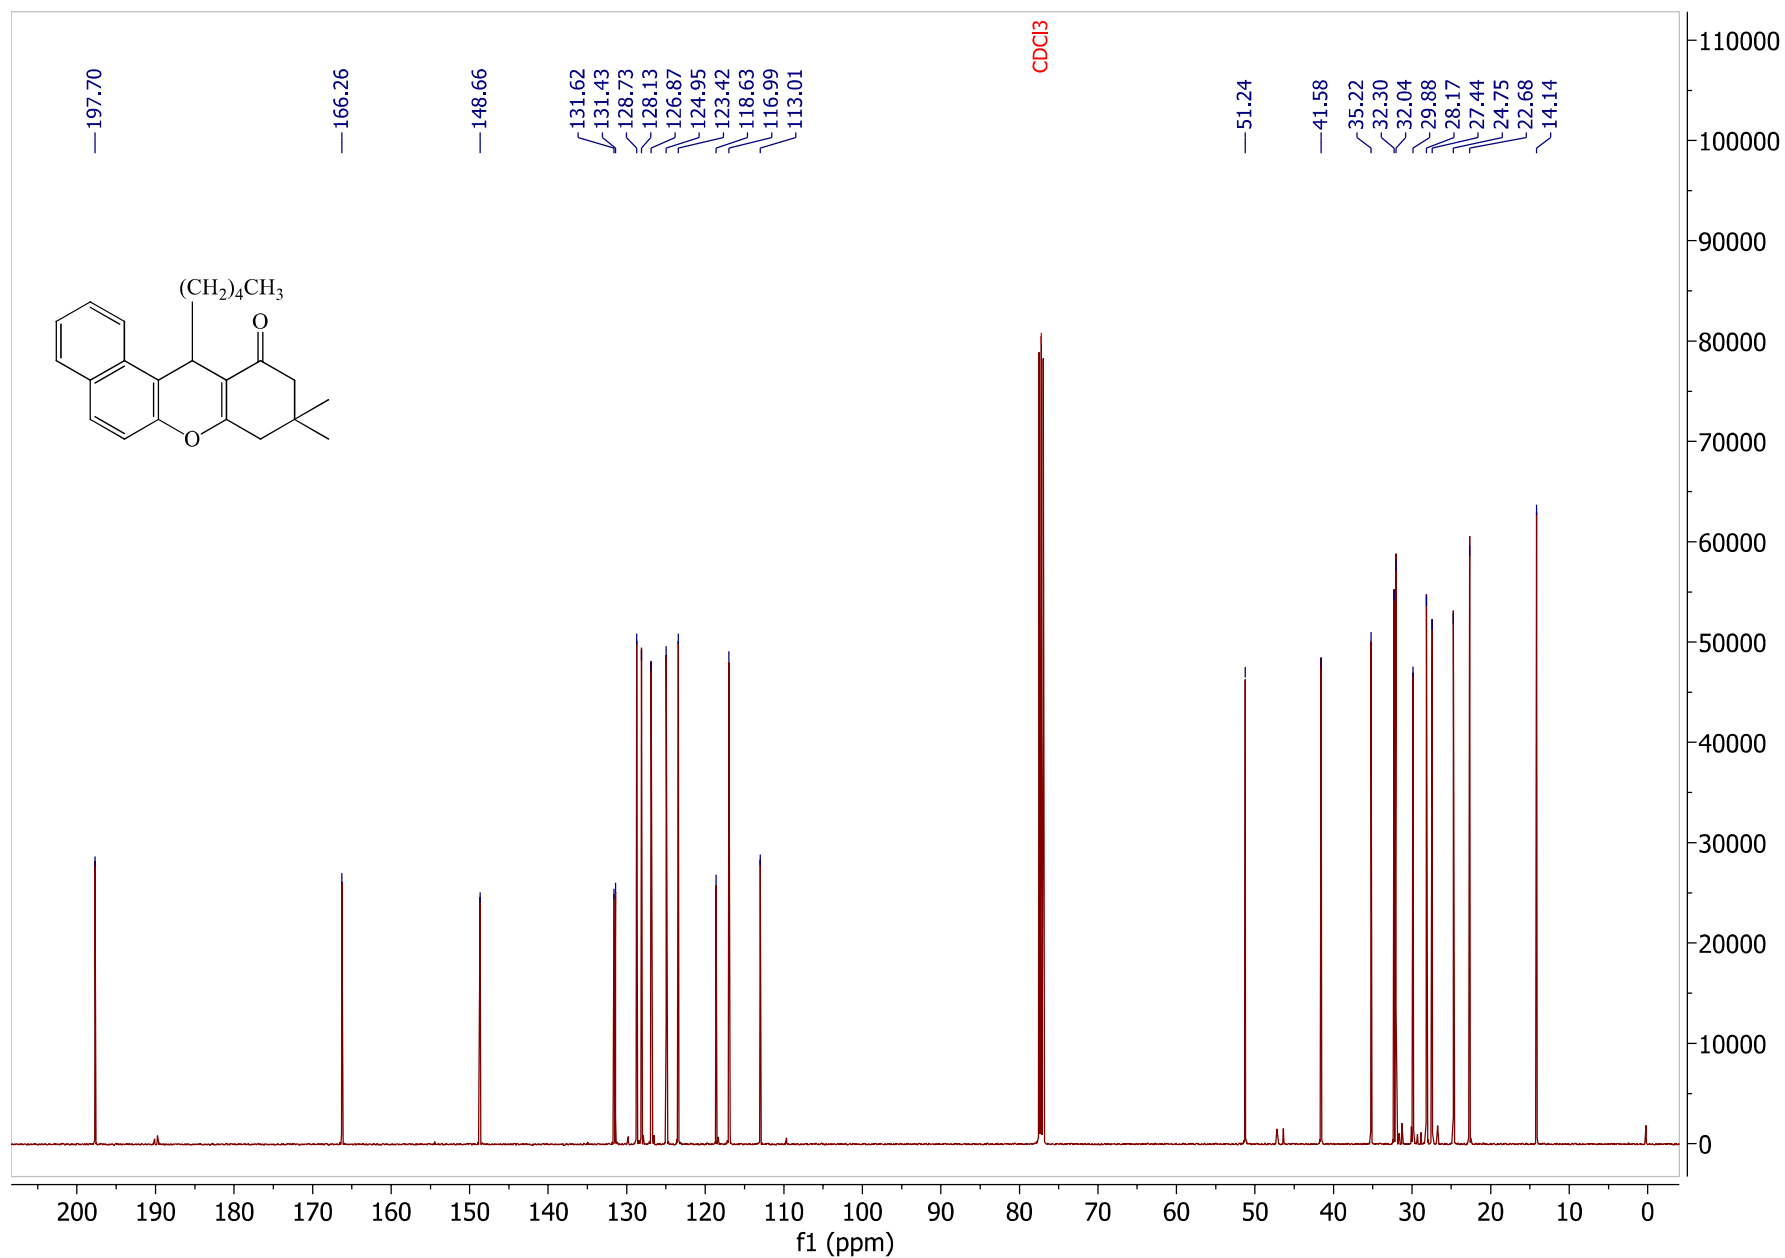

Figure S40 - <sup>13</sup>C-NMR spectrum of 9,9-dimethyl-12-pentyl-8,9,10,12-tetrahydrobenzo[a]xanthen-11-one (4o), in chloroform-d

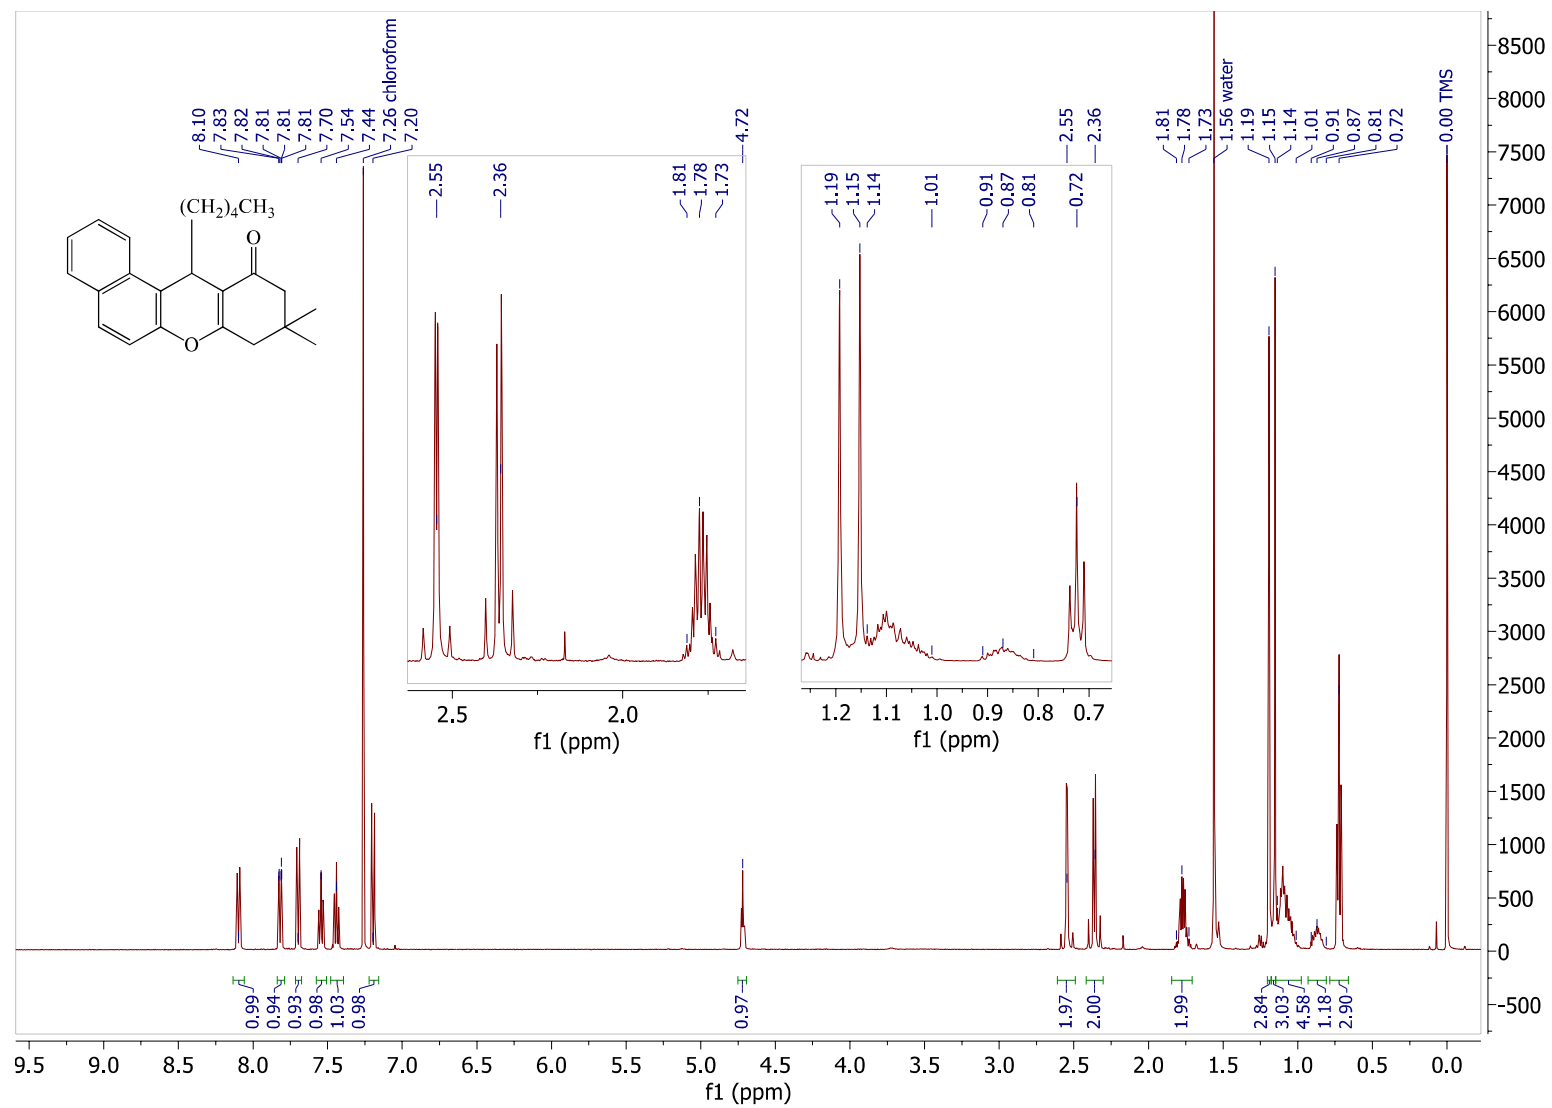

Figure S41 - <sup>1</sup>H-NMR spectrum of 9,9-dimethyl-12-pentyl-8,9,10,12-tetrahydrobenzo[a]xanthen-11-one (4o), in chloroform-d

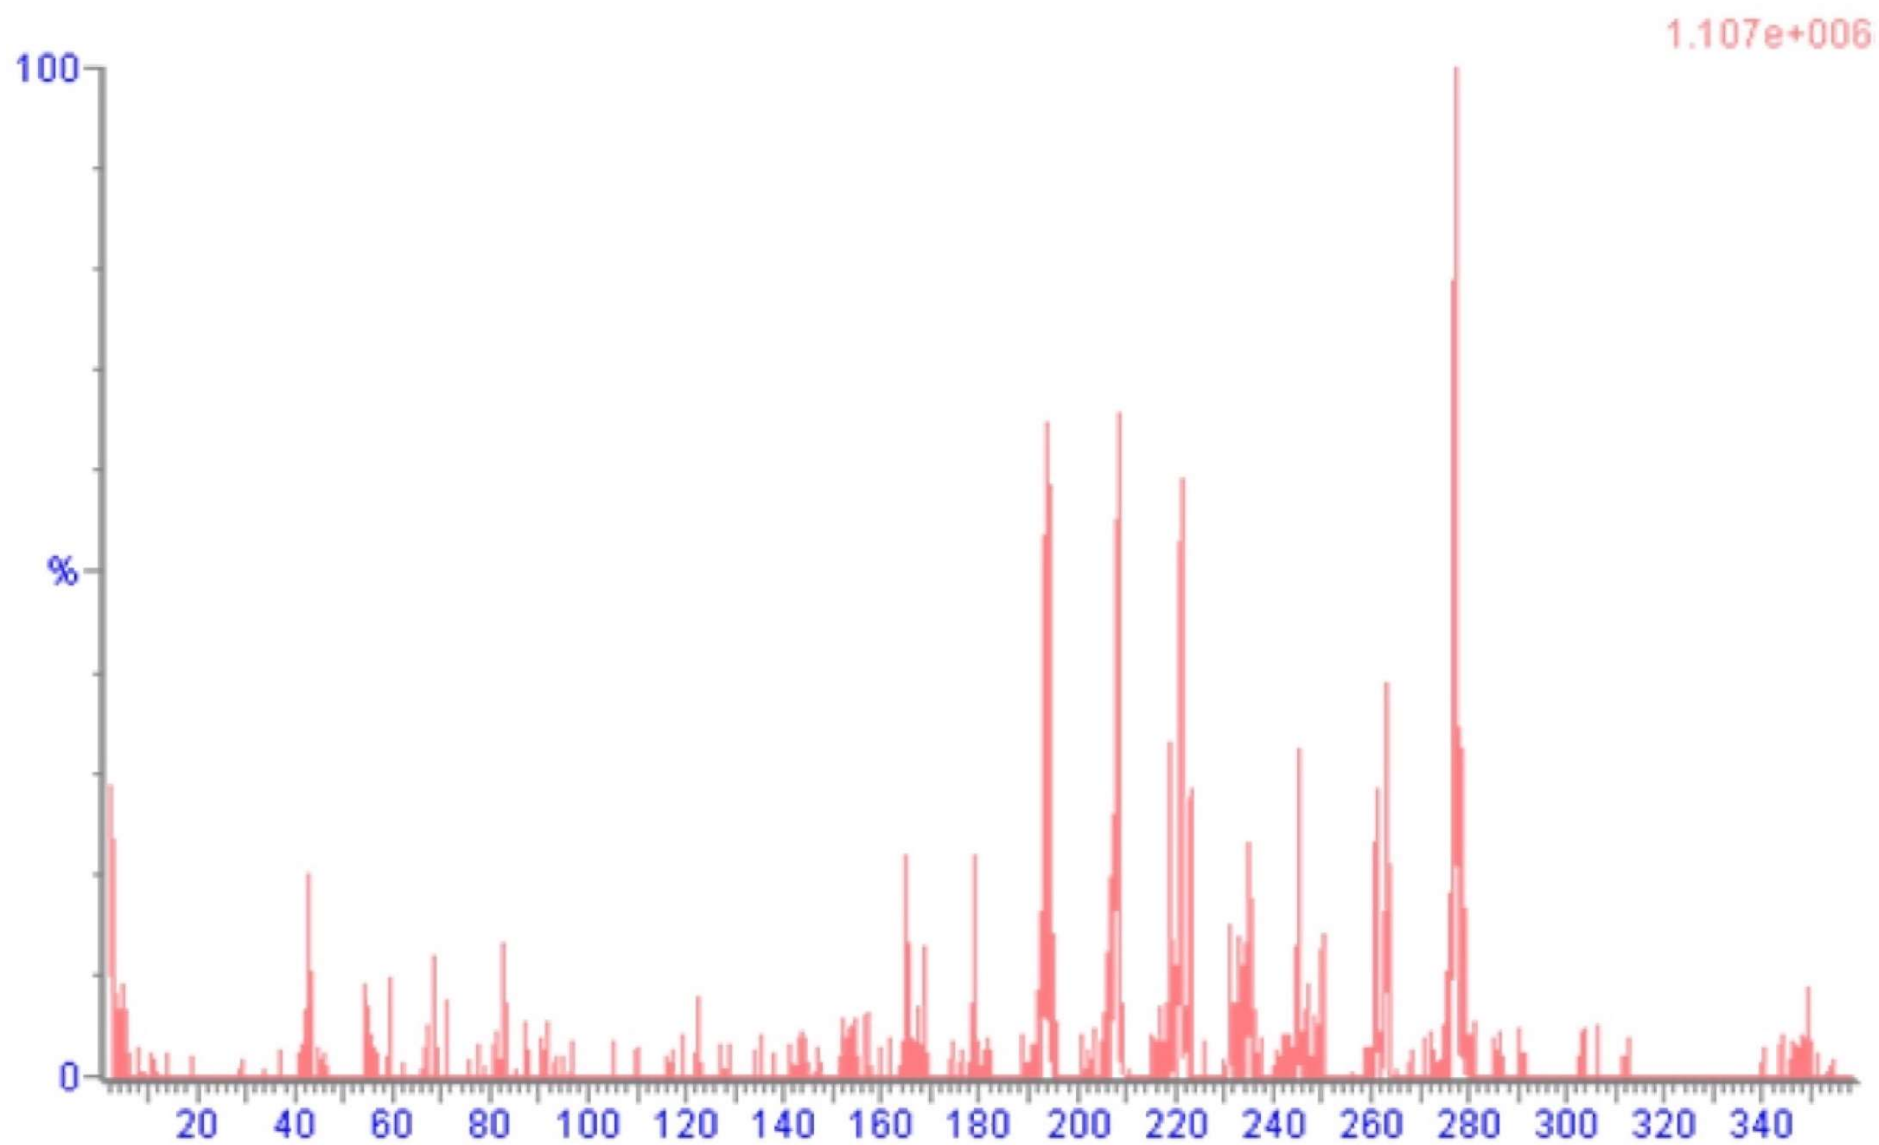

Figure S42 - MS (ES+) spectrum of 9,9-dimethyl-12-pentyl-8,9,10,12-tetrahydrobenzo[a]xanthen-11-one (4o)

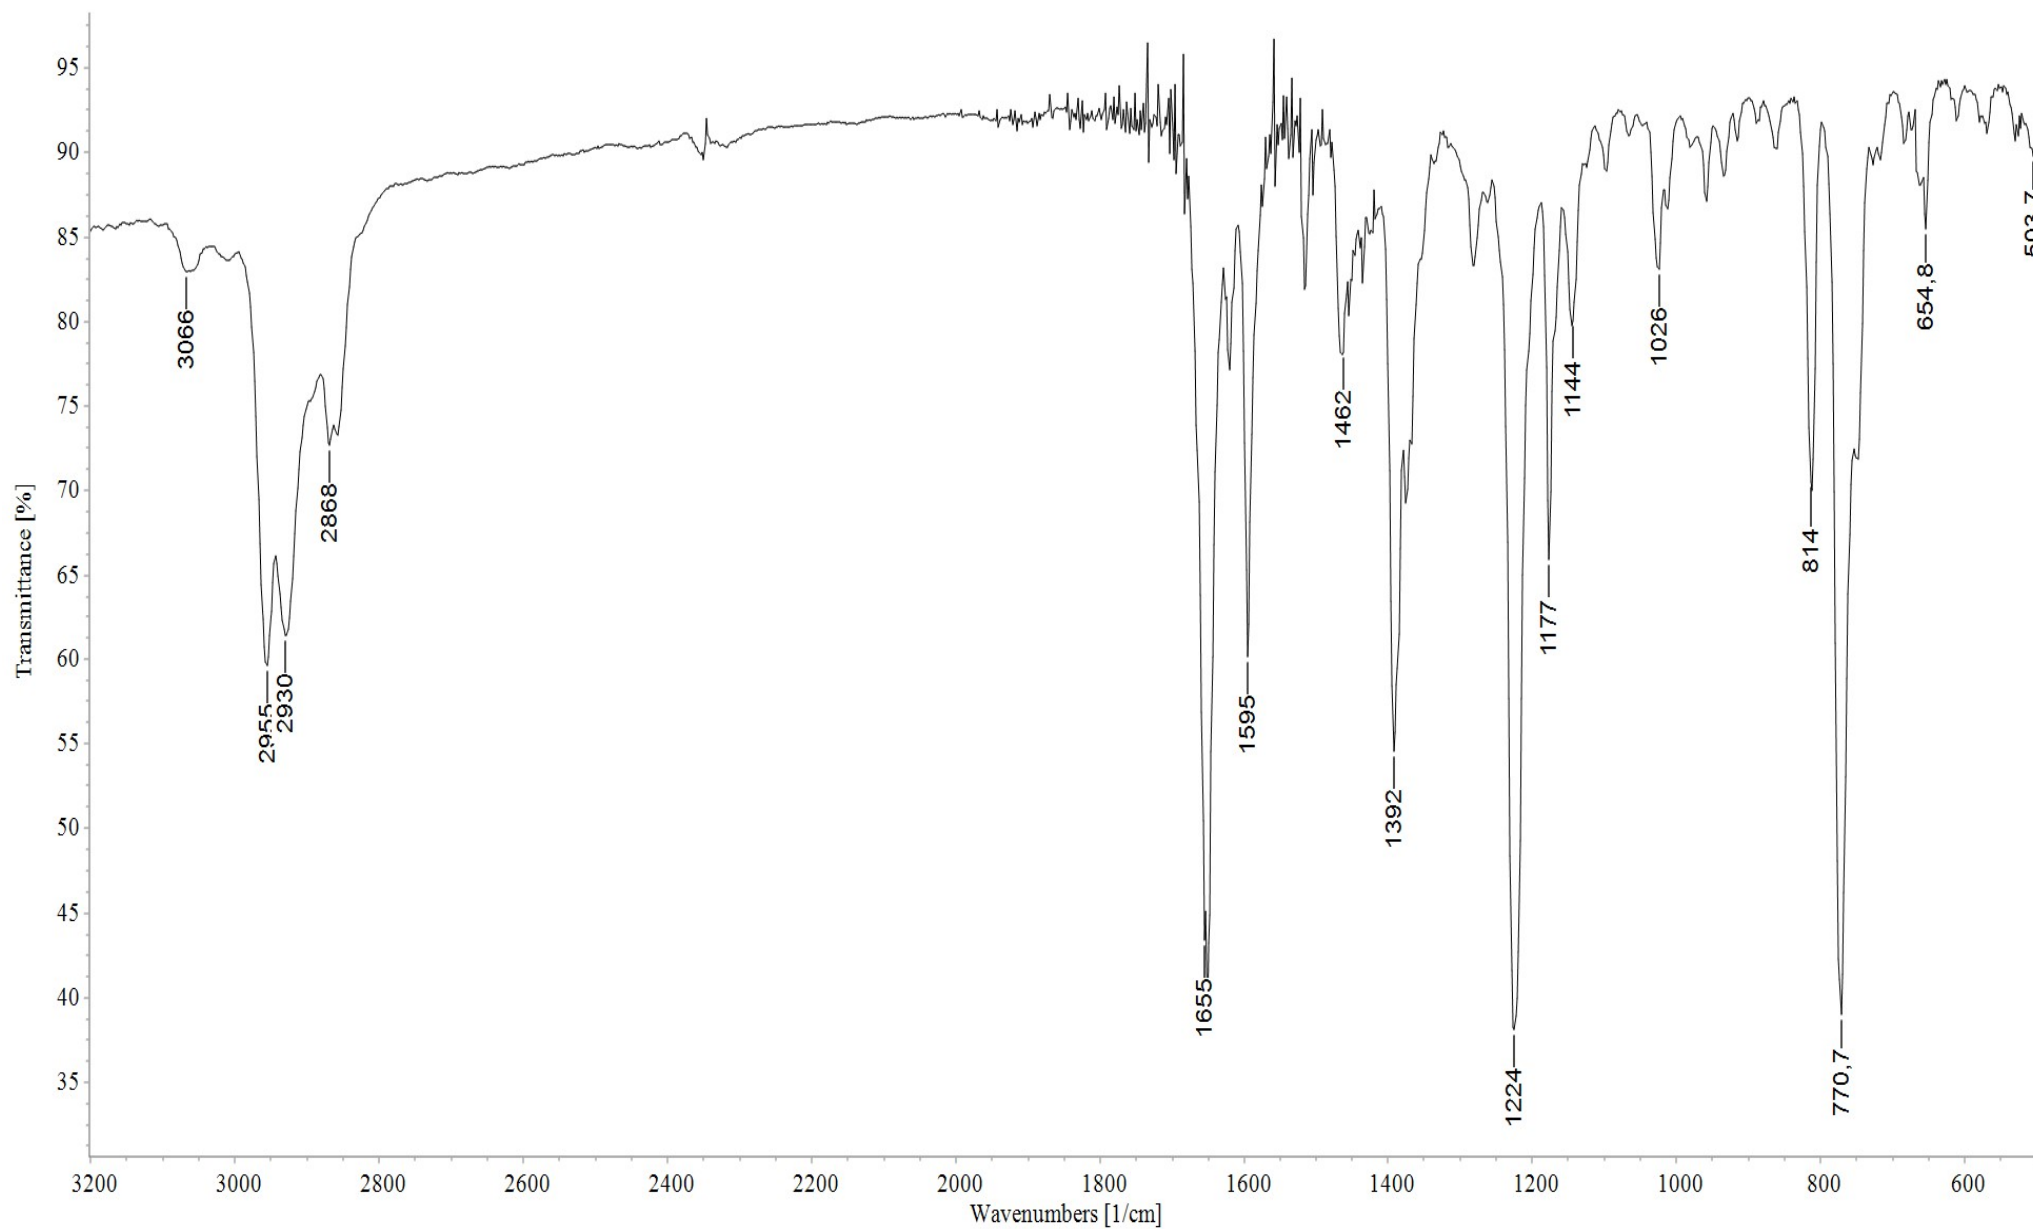

Figure S43 - FT-IR spectrum of 9,9-dimethyl-12-hexyl-8,9,10,12-tetrahydrobenzo[a]xanthene-11-one (4p), NaCl

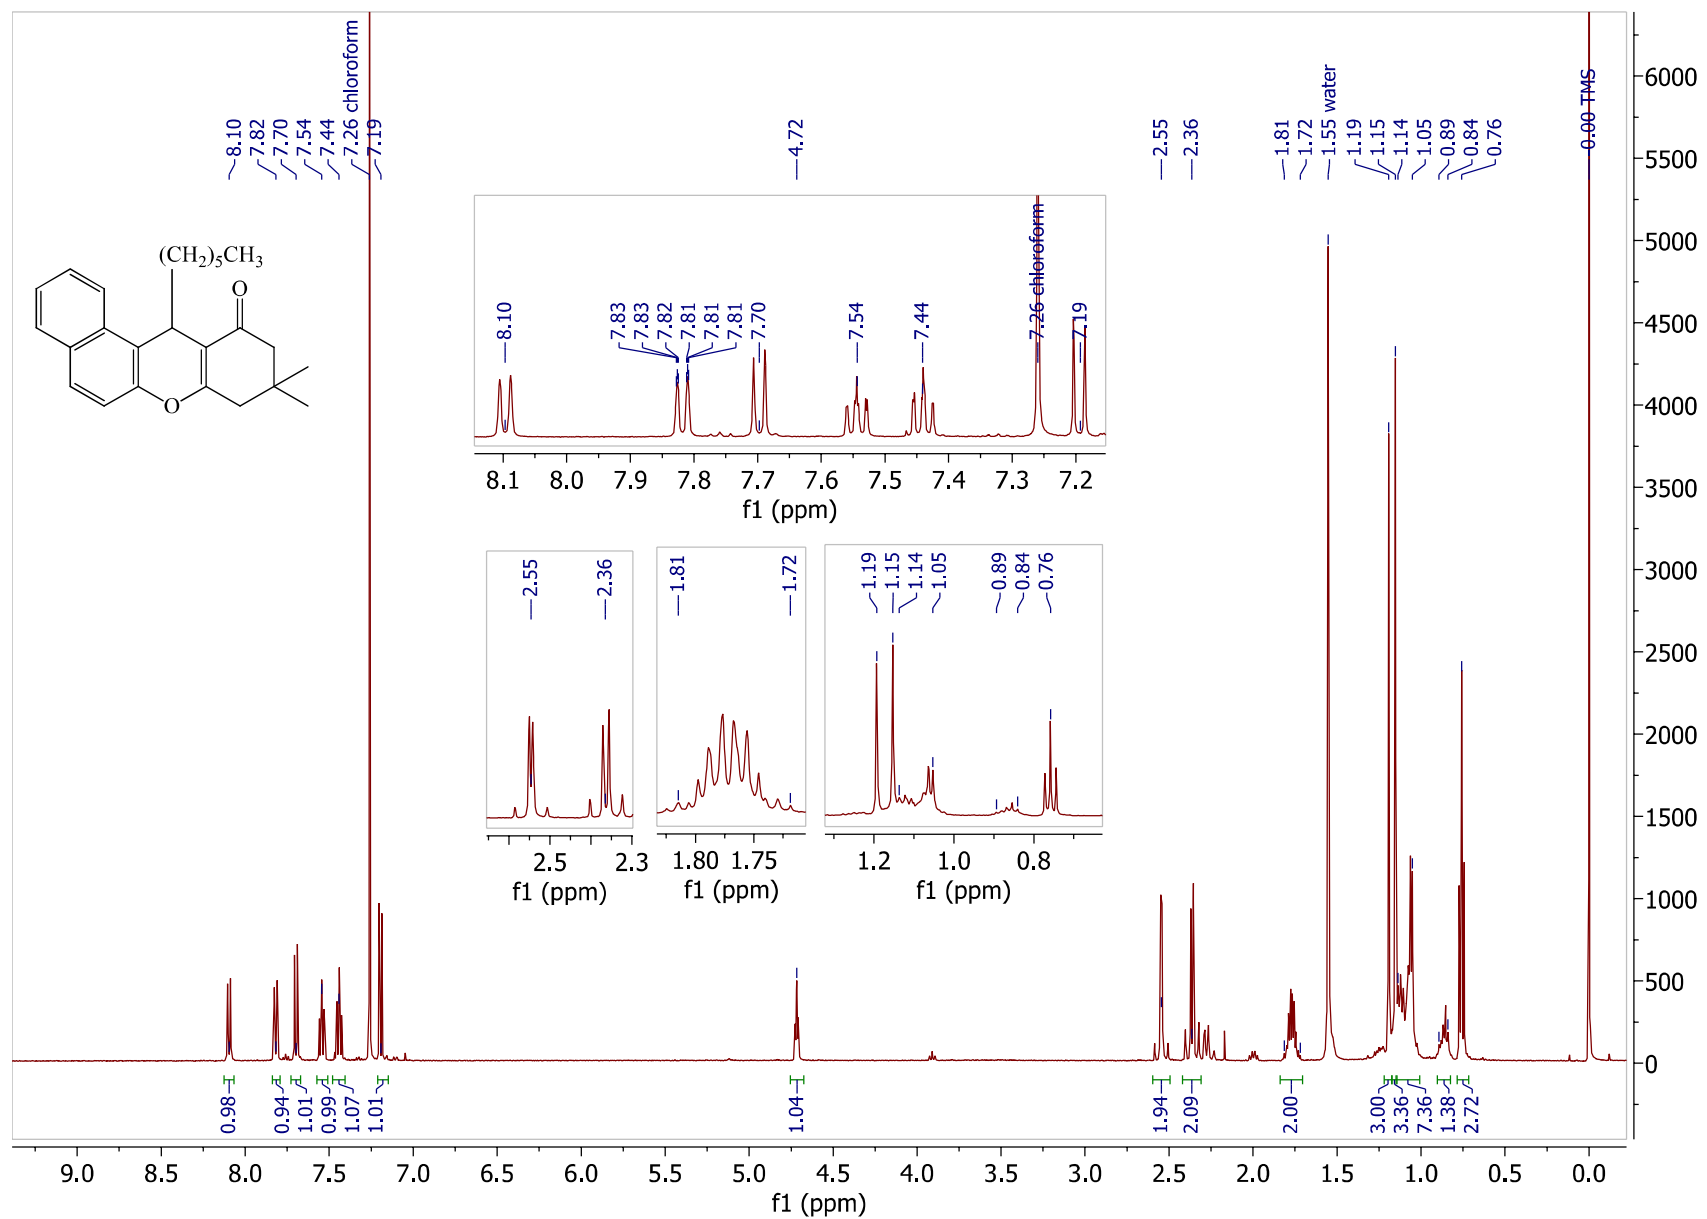

Figure S44 - <sup>1</sup>H-NMR spectrum of 9,9-dimethyl-12-hexyl-8,9,10,12-tetrahydrobenzo[a]xanthene-11-one (4p), in chloroform-d



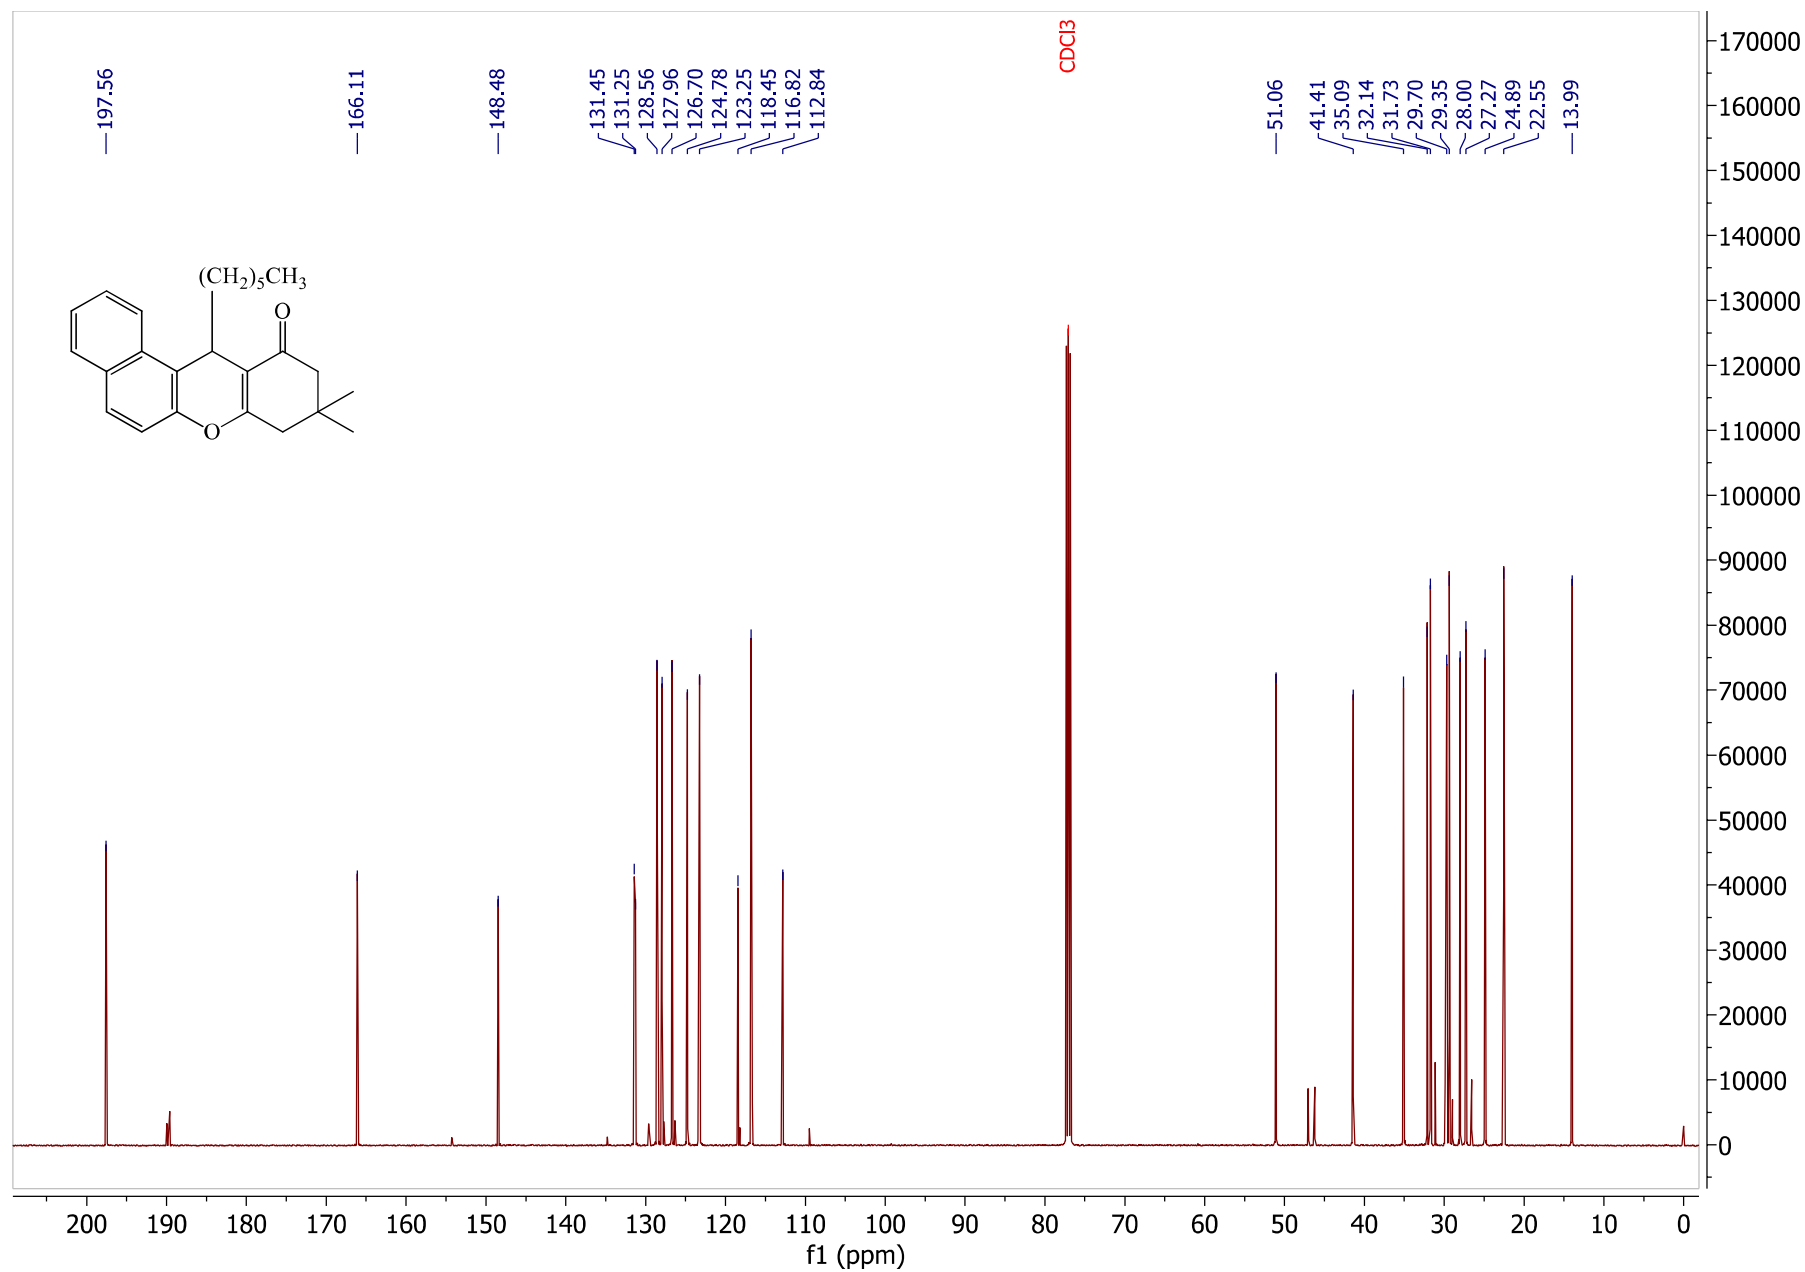

Figure S45 -  $^{13}\text{C}$ -NMR spectrum of 9,9-dimethyl-12-hexyl-8,9,10,12-tetrahydrobenzo[a]xanthen-11-one (4p), in chloroform-d

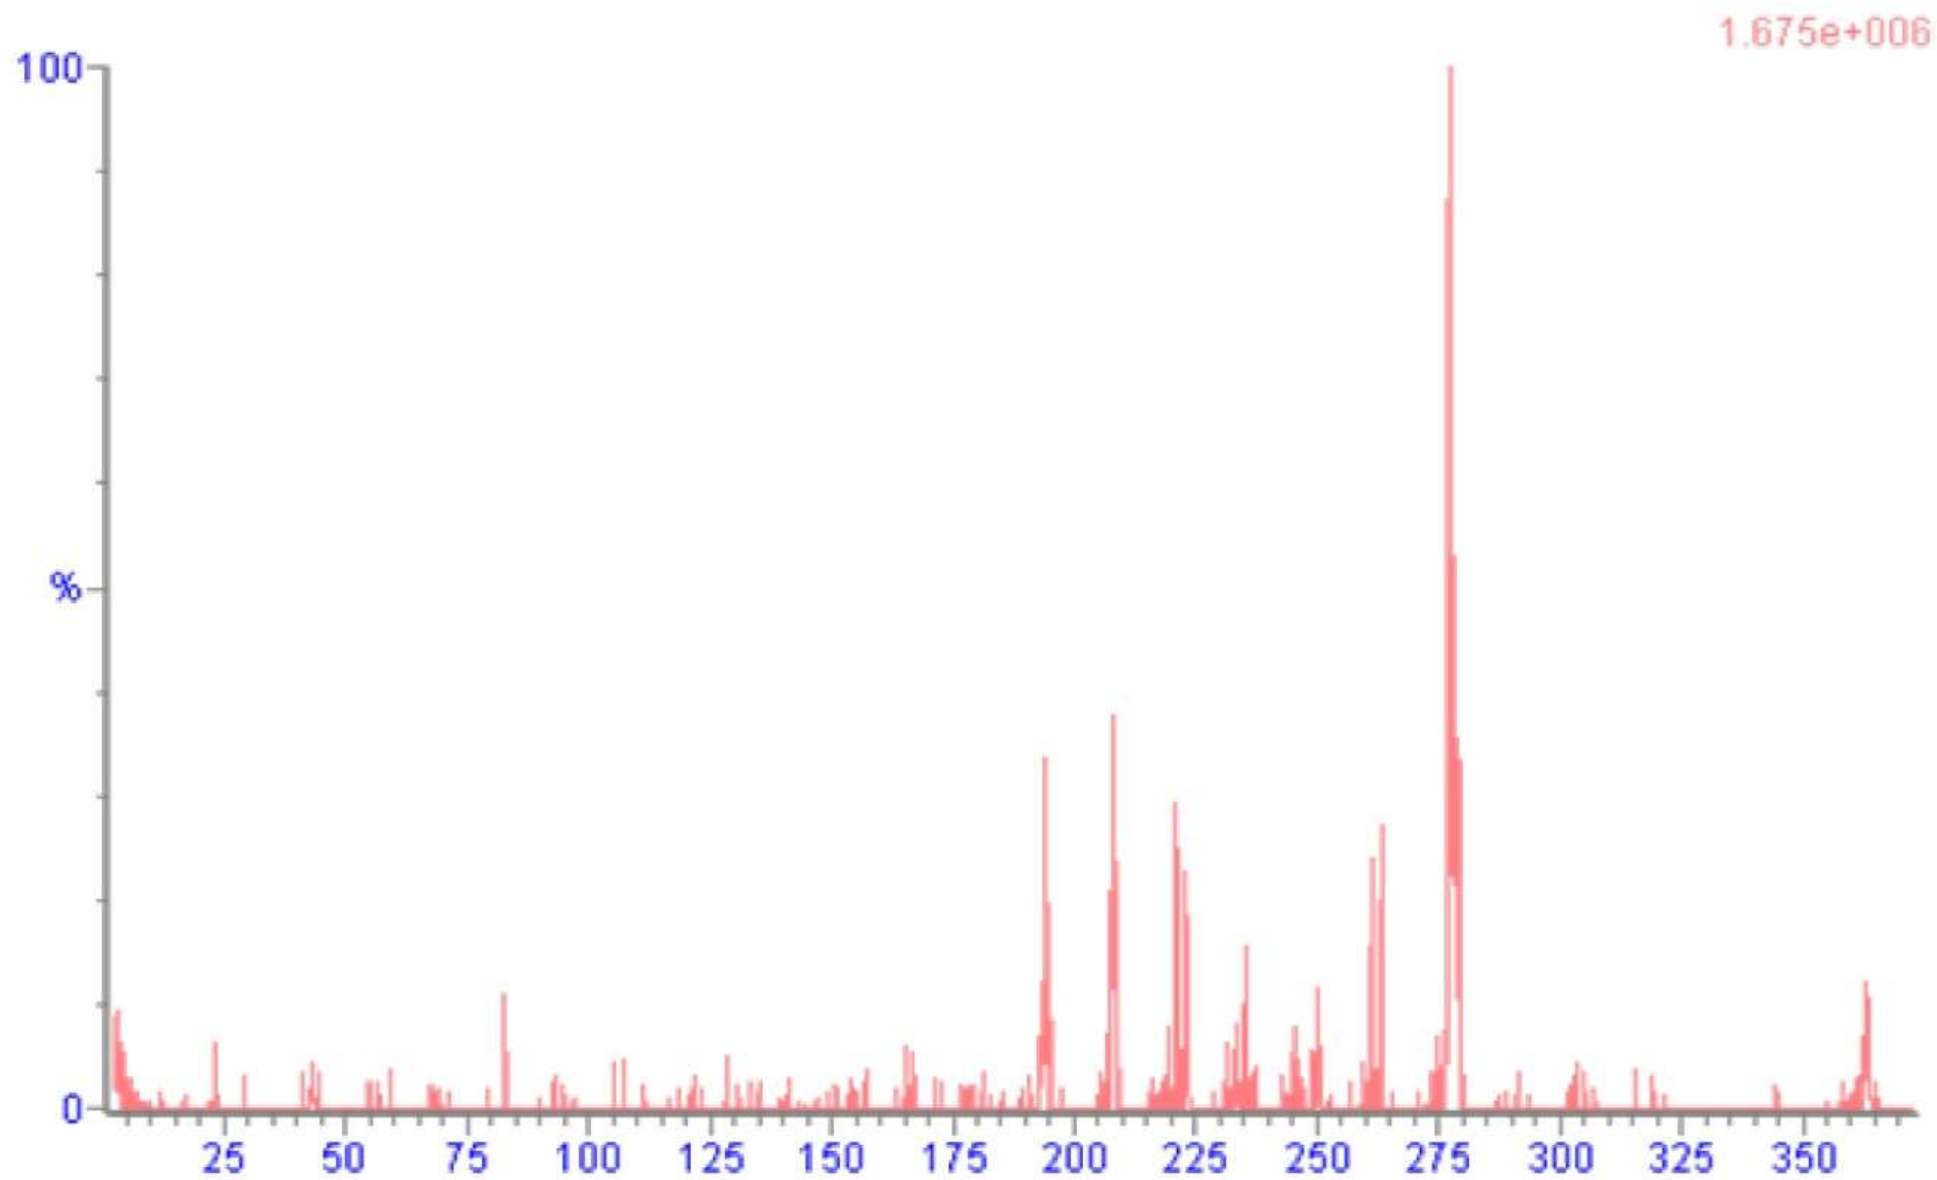

Figure S46 - MS (ES+) spectrum of 9,9-dimethyl-12-hexyl-8,9,10,12-tetrahydrobenzo[a]xanthen-11-one (4p)

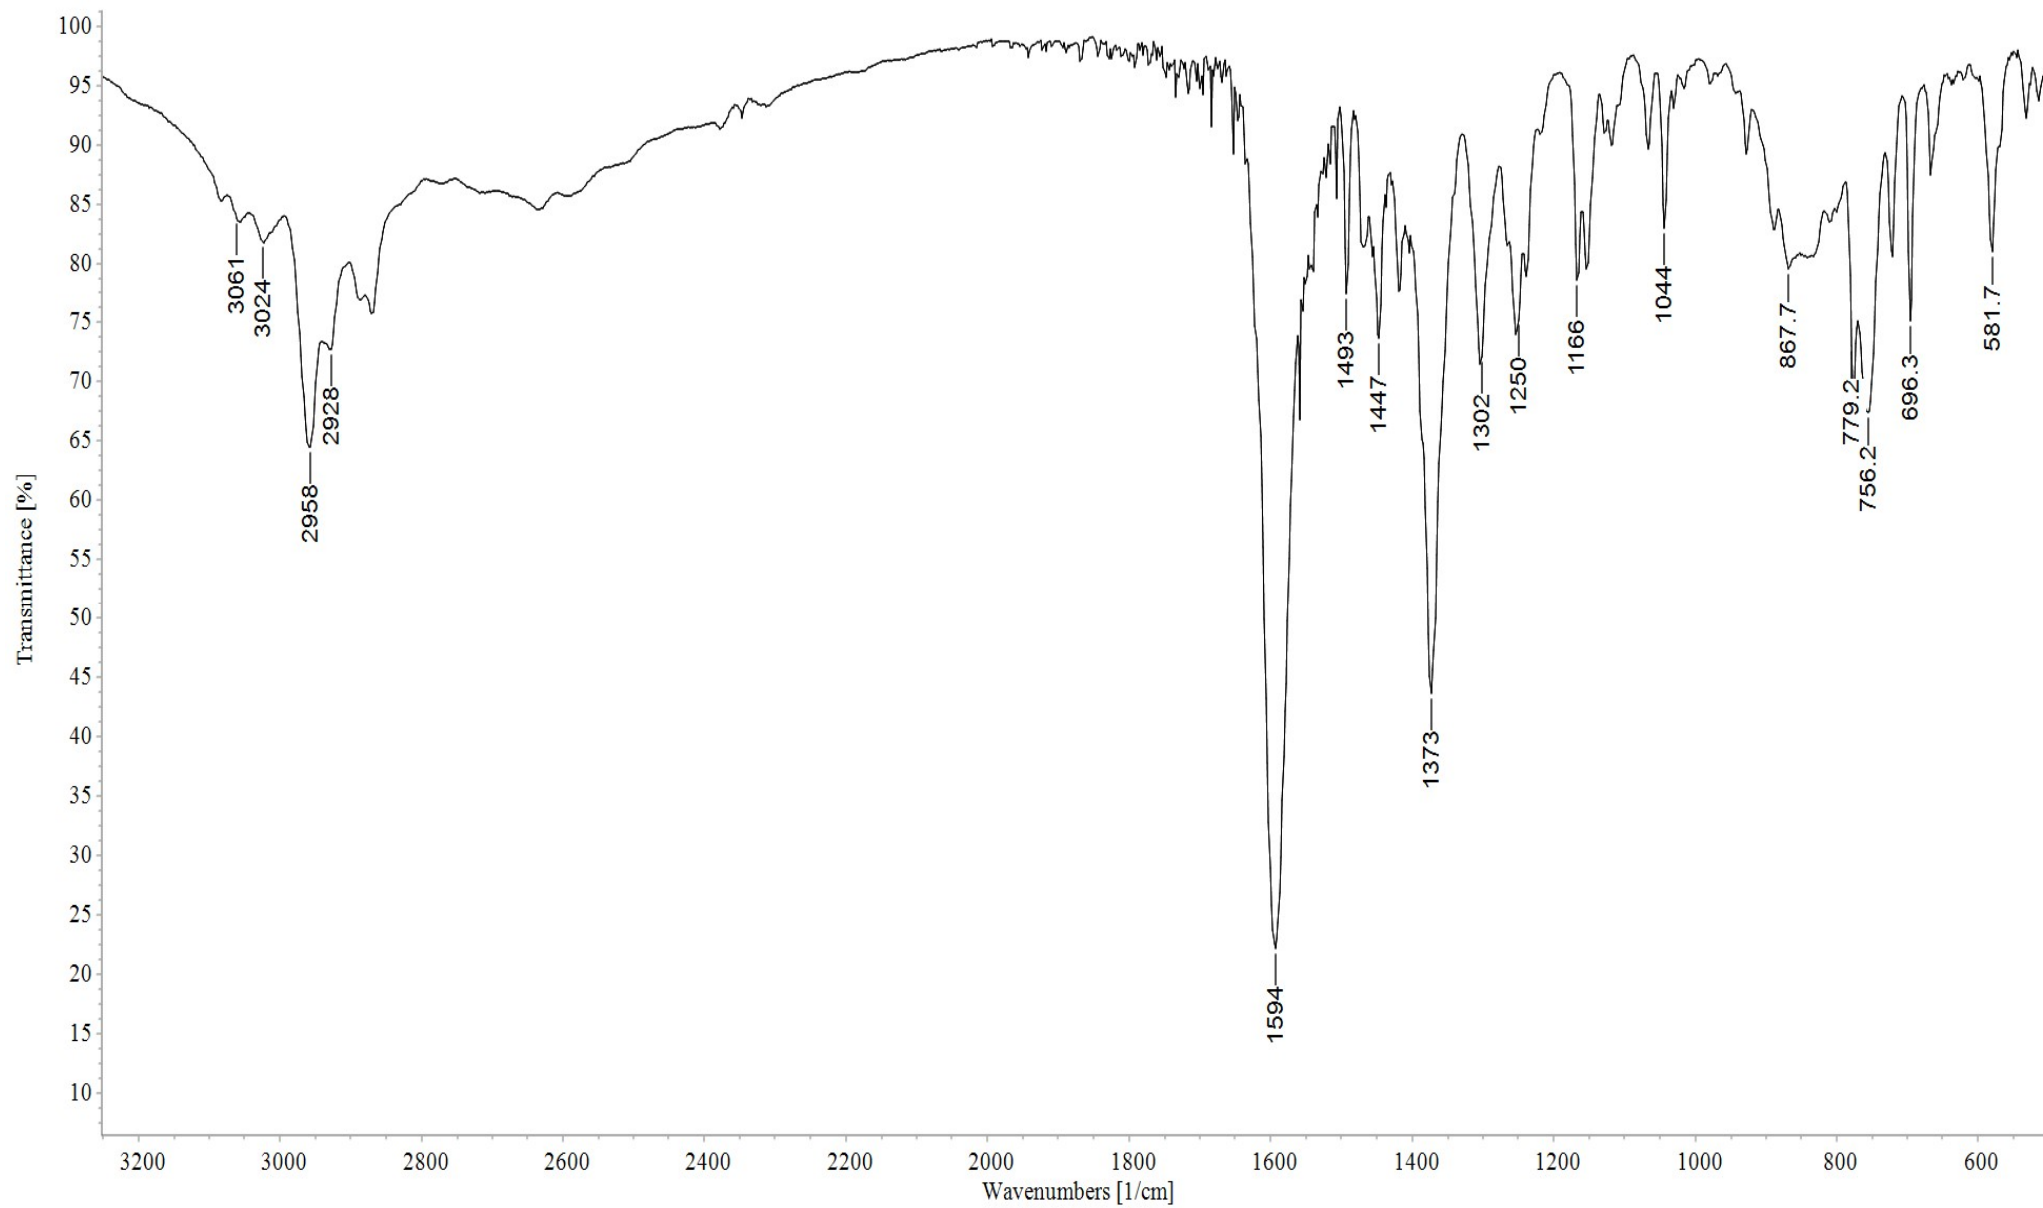

Figure S47 - FT-IR spectrum of 10,10-dimethyl-7-phenyl-10,11-dihydro-7H-benzo[c]xanthen-8(9H)-one (4q), NaCl

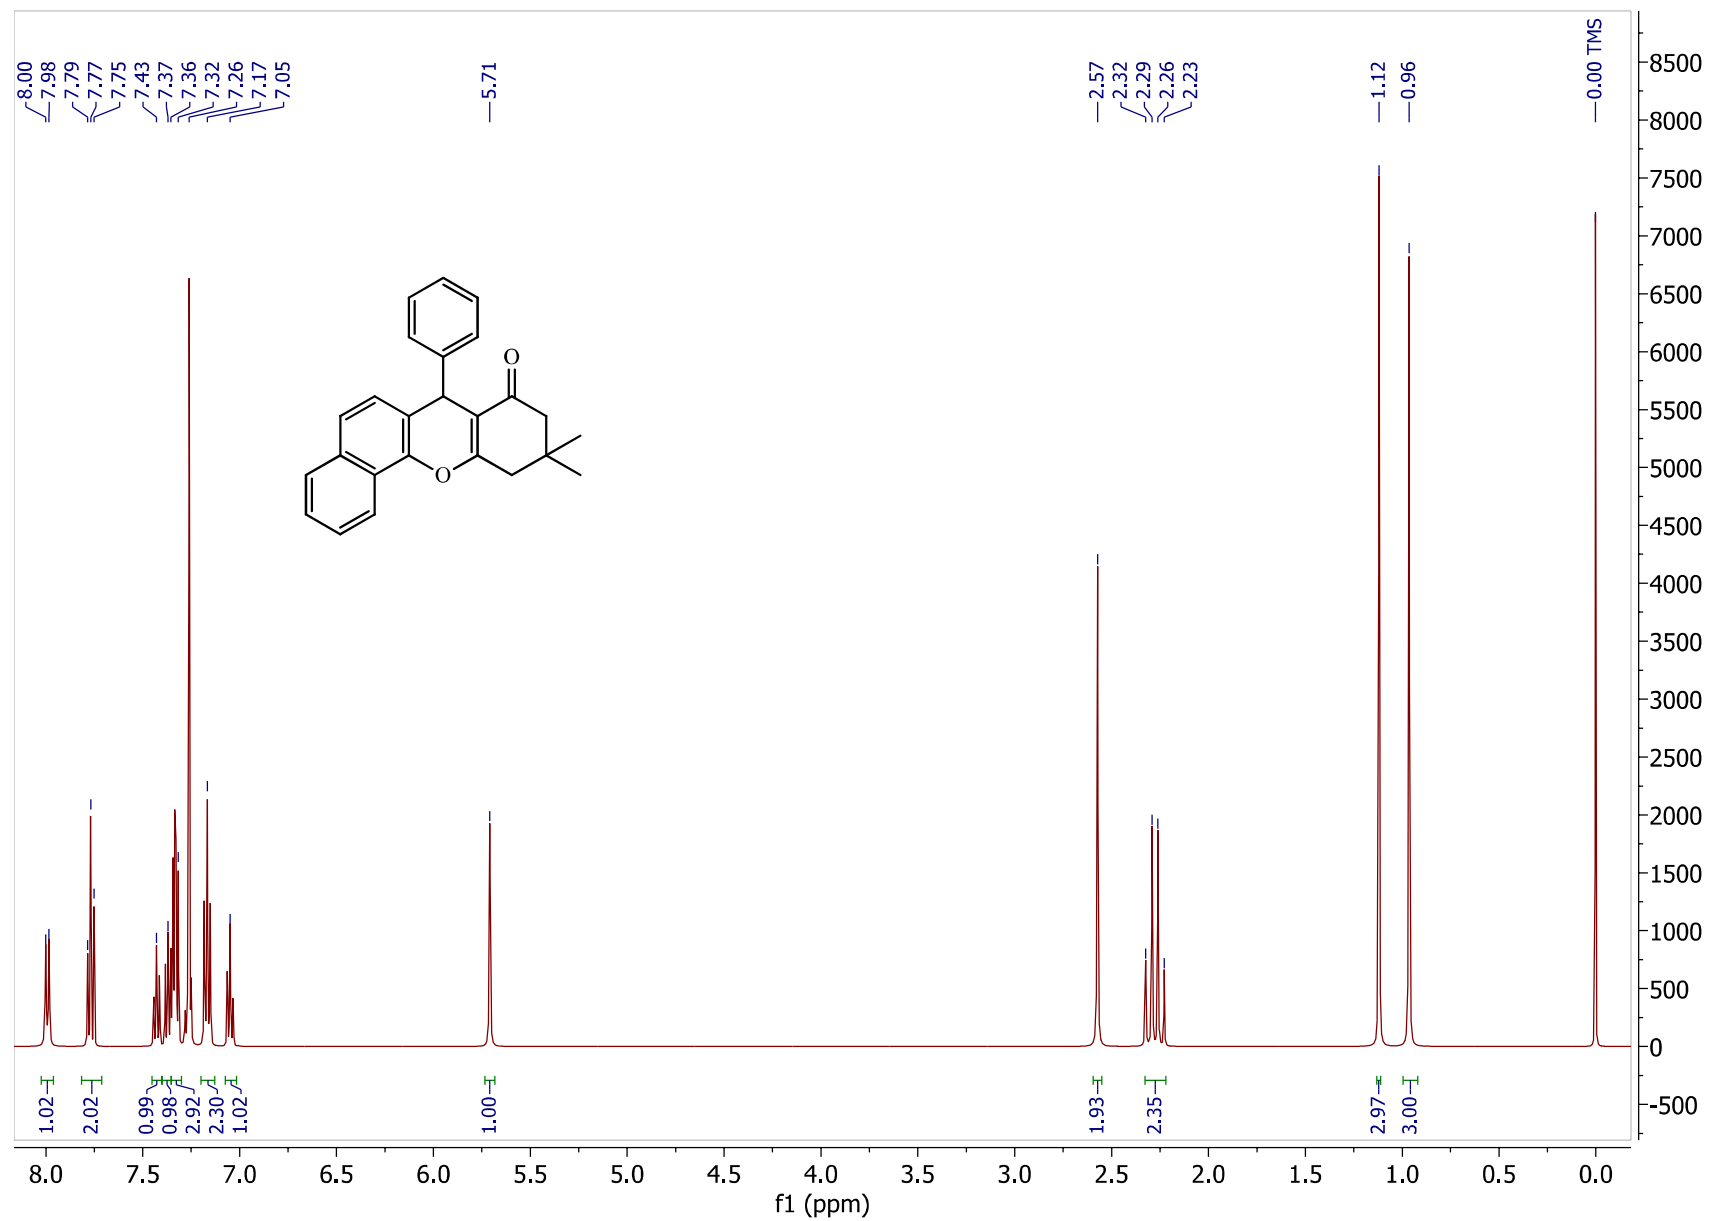

Figure S48 -  $^1\text{H}$ -NMR spectrum of 10,10-dimethyl-7-phenyl-10,11-dihydro-7H-benzo[c]xanthen-8(9H)-one (4q), in chloroform- $d$

## 2. XRF analysis of the catalyst

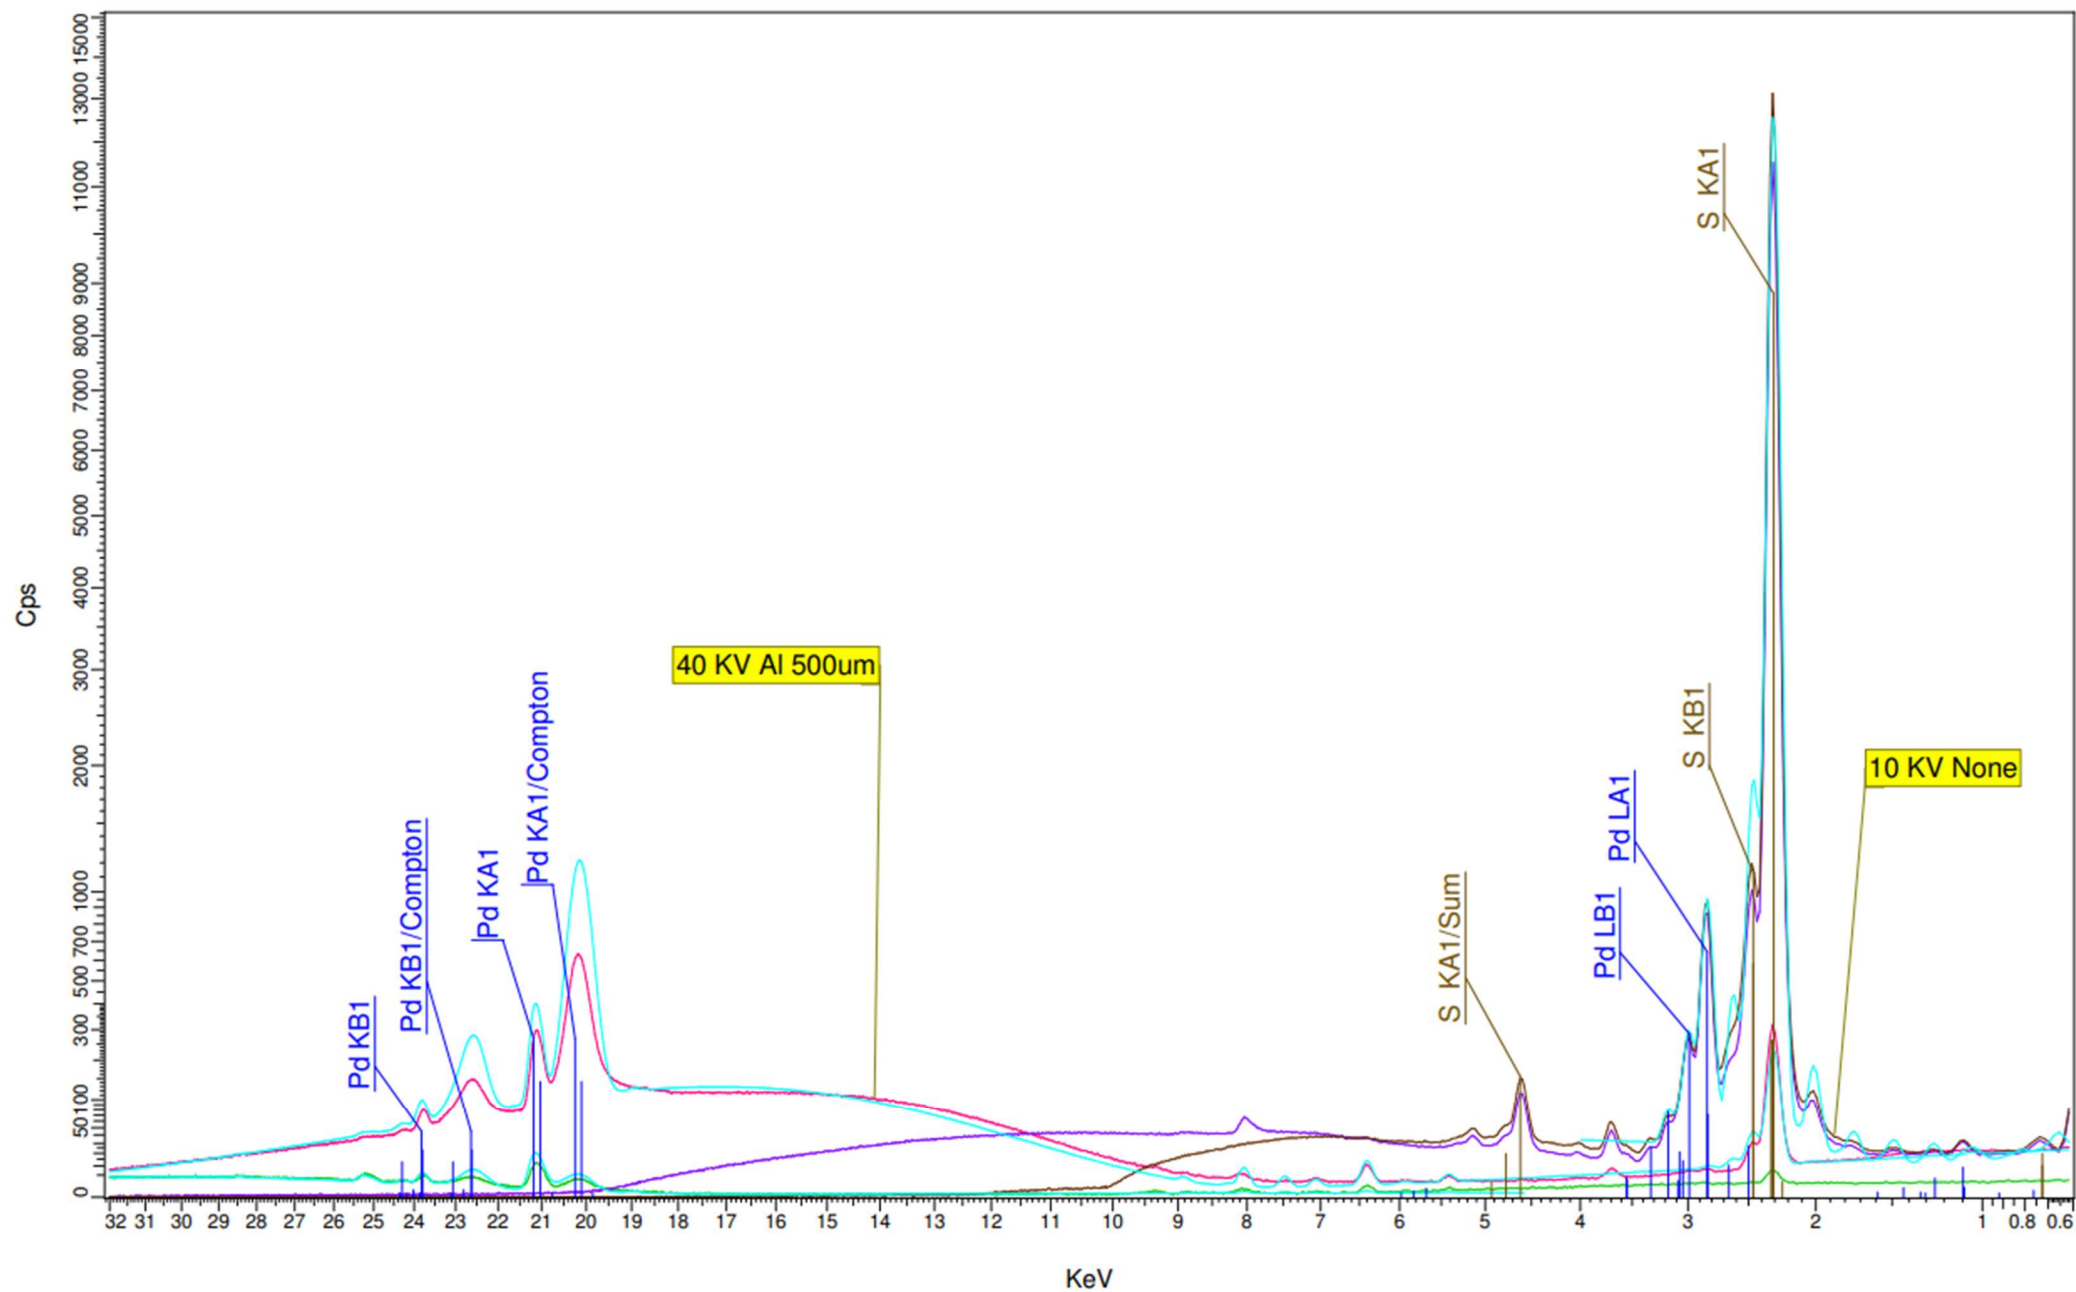

Figure S49 - XRF spectrum of Amberlyst-15

**Table S1 - results from XRF analysis of Amberlyst-15**

Amberlyst-15

R/R0 = 26.2

Polymers Evaluation

| Formula | Z  | Concentration | Status       | Line 1      | Net int. |
|---------|----|---------------|--------------|-------------|----------|
| CH2     | 6  | 88.8          | Matrix       |             |          |
| S       | 16 | 6.24          | Fit spectrum | S KA1/EQ10  | 8364     |
| Na      | 11 | 3.79          | Fit spectrum | Na KA1/EQ10 | 6.26     |
| Mg      | 12 | 0.695         | Fit spectrum | Mg KA1/EQ10 | 9.26     |
| Al      | 13 | 0.143         | Fit spectrum | Al KA1/EQ10 | 13.9     |
| P       | 15 | 0.139         | Fit spectrum | P KA1/EQ10  | 107      |
| Cl      | 17 | 0.138         | Fit spectrum | Cl KA1/EQ10 | 271.3    |
| Si      | 14 | 0.0401        | Fit spectrum | Si KA1/EQ10 | 19.3     |
| Fe      | 26 | 0.003         | Fit spectrum | Fe KA1/EQ10 | 28.4     |
| Sn      | 50 | 0.0026        | Fit spectrum | Sn KA1/EQ40 | 3.69     |
| Cr      | 24 | 0.0016        | Fit spectrum | Cr KA1/EQ10 | 2.02     |
| Cu      | 29 | 0.0008        | Fit spectrum | Cu KA1/EQ10 | 14.7     |
| Ni      | 28 | 0.0004        | Fit spectrum | Ni KA1/EQ10 | 8.59     |
| Ag      | 47 | 0.0003        | Fit spectrum | Ag KA1/EQ40 | 0.95     |
| Sr      | 38 | 0             | Fit spectrum | Sr KA1/EQ40 |          |
| Bi      | 83 | 0             | Fit spectrum | Bi LA1/EQ40 |          |
| Ca      | 20 | 0             | Fit spectrum | Ca KA1/EQ10 |          |
| Br      | 35 | 0             | Fit spectrum | Br KA1/EQ40 |          |
| Pb      | 82 | 0             | Fit spectrum | Pb LA1/EQ40 |          |
| Mo      | 42 | 0             | Fit spectrum | Mo KA1/EQ40 |          |
| Nb      | 41 | 0             | Fit spectrum | Nb KA1/EQ40 |          |
| Zn      | 30 | 0             | Fit spectrum | Zn KA1/EQ10 |          |
| Co      | 27 | 0             | Fit spectrum | Co KA1/EQ10 |          |
| Mn      | 25 | 0             | Fit spectrum | Mn KA1/EQ10 |          |
| V       | 23 | 0             | Fit spectrum | V KA1/EQ10  |          |
| Ti      | 22 | 0             | Fit spectrum | Ti KA1/EQ10 |          |
| Ba      | 56 | 0             | Fit spectrum | Ba KA1/EQ40 |          |
| Sb      | 51 | 0             | Fit spectrum | Sb KA1/EQ40 |          |
| Cd      | 48 | 0             | Fit spectrum | Cd KA1/EQ40 |          |
| Zr      | 40 | 0             | Fit spectrum | Zr KA1/EQ40 |          |
| K       | 19 | 0             | Fit spectrum | K KA1/EQ10  |          |

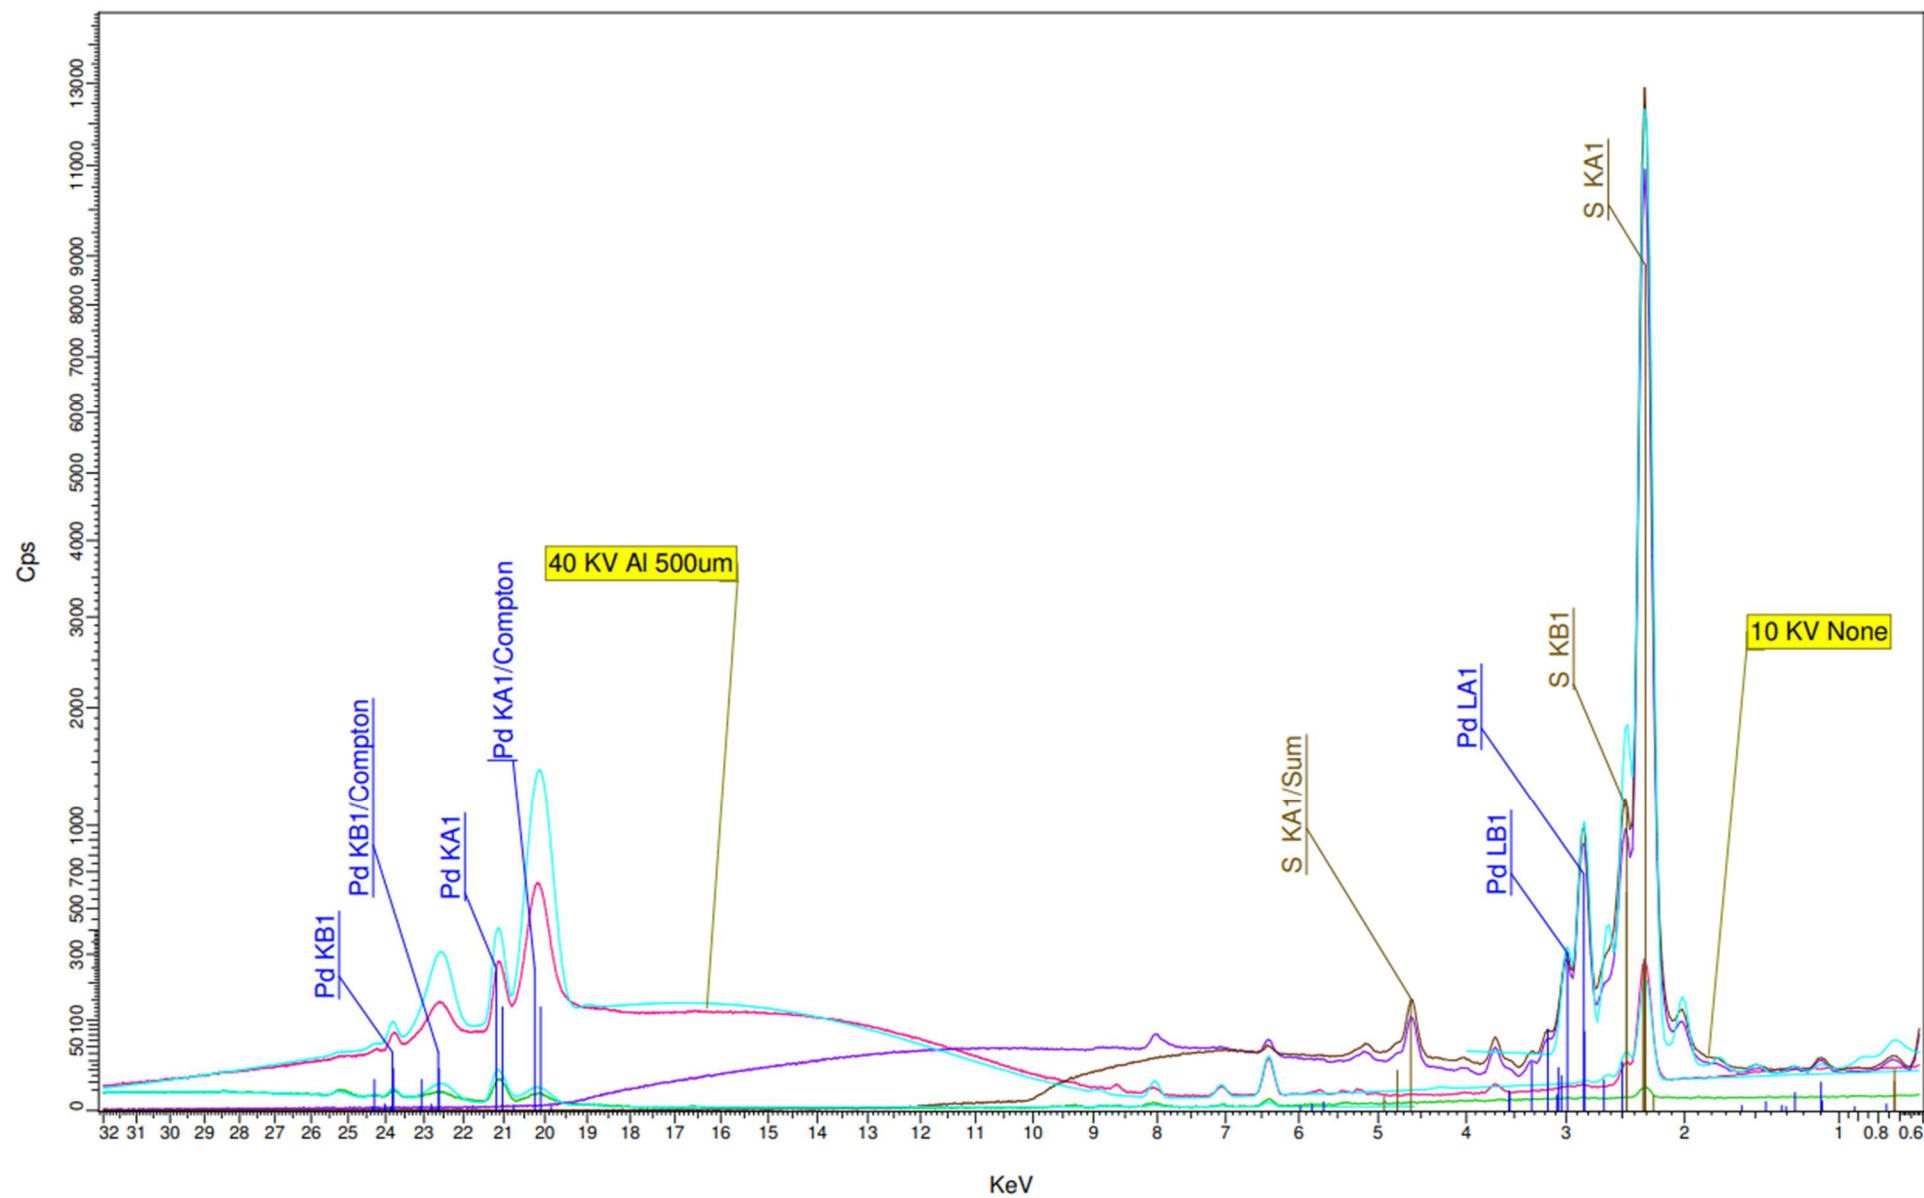

Figure S50 - XRF spectrum of DABCO / Amberlyst-15 (30 w/w%)

**Table S2 - results from XRF analysis of DABCO / Amberlyst-15 (30 w/w%)**

DABCO / Amberlyst-15

R/R<sub>0</sub> = 31.1

Polymers Evaluation

| Formula | Z  | Concentration | Status       | Line 1      | Net int. |
|---------|----|---------------|--------------|-------------|----------|
| CH2     | 6  | 95.1          | Matrix       |             |          |
| S       | 16 | 4.5           | Fit spectrum | S KA1/EQ10  | 7949     |
| Mg      | 12 | 0.136         | Fit spectrum | Mg KA1/EQ10 | 2.19     |
| Cl      | 17 | 0.0942        | Fit spectrum | Cl KA1/EQ10 | 250.3    |
| P       | 15 | 0.0837        | Fit spectrum | P KA1/EQ10  | 83.6     |
| Al      | 13 | 0.0467        | Fit spectrum | Al KA1/EQ10 | 5.69     |
| Si      | 14 | 0.0149        | Fit spectrum | Si KA1/EQ10 | 9.18     |
| Fe      | 26 | 0.0062        | Fit spectrum | Fe KA1/EQ10 | 80.5     |
| Sn      | 50 | 0.0018        | Fit spectrum | Sn KA1/EQ40 | 2.74     |
| Cu      | 29 | 0.0006        | Fit spectrum | Cu KA1/EQ10 | 16.6     |
| Ag      | 47 | 0.0002        | Fit spectrum | Ag KA1/EQ40 | 0.64     |
| Sr      | 38 | 0             | Fit spectrum | Sr KA1/EQ40 |          |
| Bi      | 83 | 0             | Fit spectrum | Bi LA1/EQ40 |          |
| Ca      | 20 | 0             | Fit spectrum | Ca KA1/EQ10 |          |
| Br      | 35 | 0             | Fit spectrum | Br KA1/EQ40 |          |
| Pb      | 82 | 0             | Fit spectrum | Pb LA1/EQ40 |          |
| Mo      | 42 | 0             | Fit spectrum | Mo KA1/EQ40 |          |
| Nb      | 41 | 0             | Fit spectrum | Nb KA1/EQ40 |          |
| Zn      | 30 | 0             | Fit spectrum | Zn KA1/EQ10 |          |
| Ni      | 28 | 0             | Fit spectrum | Ni KA1/EQ10 |          |
| Co      | 27 | 0             | Fit spectrum | Co KA1/EQ10 |          |
| Mn      | 25 | 0             | Fit spectrum | Mn KA1/EQ10 |          |
| V       | 23 | 0             | Fit spectrum | V KA1/EQ10  |          |
| Cr      | 24 | 0             | Fit spectrum | Cr KA1/EQ10 |          |
| Ti      | 22 | 0             | Fit spectrum | Ti KA1/EQ10 |          |
| Na      | 11 | 0             | Fit spectrum | Na KA1/EQ10 |          |
| Ba      | 56 | 0             | Fit spectrum | Ba KA1/EQ40 |          |
| Sb      | 51 | 0             | Fit spectrum | Sb KA1/EQ40 |          |
| Cd      | 48 | 0             | Fit spectrum | Cd KA1/EQ40 |          |
| Zr      | 40 | 0             | Fit spectrum | Zr KA1/EQ40 |          |
| K       | 19 | 0             | Fit spectrum | K KA1/EQ10  |          |



### 3. E-factor

Table S3 - Calculation of the E-factor for the synthesised products

| Entry          | Yield (%) | Total mass of starting materials (mg)                                          | Total mass of product (mg) | Total mass of waste (mg)                           | E-factor                                                          |
|----------------|-----------|--------------------------------------------------------------------------------|----------------------------|----------------------------------------------------|-------------------------------------------------------------------|
| Model Reaction |           | Mass of dimedone + mass of benzaldehyde + mass of 2-naphthol                   | Mass of product 4a         | Total mass of starting materials – mass of product | $\frac{\text{Total mass of waste}}{\text{Total mass of product}}$ |
| (4a)           | 92        | Dimedone (364.5 mg) + benzaldehyde (212.2 mg) + 2-naphthol (288.3 mg) = 865 mg | 655 mg                     | 865 mg – 655 mg = 210 mg                           | = 0.32                                                            |
| 4b             | 88        | 792.08                                                                         | 574.45                     | 217.63                                             | 0.38                                                              |
| 4c             | 80        | 901.00                                                                         | 590.00                     | 311.00                                             | 0.53                                                              |
| 4d             | 79        | 933.94                                                                         | 614.45                     | 319.49                                             | 0.52                                                              |
| 4e             | 78        | 1,002.82                                                                       | 657.00                     | 345.82                                             | 0.53                                                              |
| 4f             | 76        | 933.94                                                                         | 591.11                     | 342.83                                             | 0.58                                                              |
| 4g             | 92        | 955.04                                                                         | 736.00                     | 219.04                                             | 0.30                                                              |
| 4h             | 43        | 897.05                                                                         | 316.00                     | 581.05                                             | 1.84                                                              |
| 4i             | 40        | 897.05                                                                         | 296.30                     | 600.75                                             | 2.03                                                              |
| 4j             | 43        | 925.30                                                                         | 330.64                     | 594.66                                             | 1.80                                                              |
| 4k             | 51        | 844.969                                                                        | 351.29                     | 493.68                                             | 1.41                                                              |
| 4l             | 90        | 915.06                                                                         | 680.30                     | 234.76                                             | 0.35                                                              |
| 4m             | 57        | 893.10                                                                         | 411.00                     | 482.10                                             | 1.17                                                              |
| 4n             | 79        | 825.07                                                                         | 528.44                     | 296.63                                             | 0.56                                                              |
| 4o             | 61        | 853.12                                                                         | 422.00                     | 431.12                                             | 1.02                                                              |
| 4p             | 44        | 941.18                                                                         | 319.00                     | 622.18                                             | 1.95                                                              |
| 4q             | 84        | 865.04                                                                         | 595.47                     | 269.57                                             | 0.45                                                              |

#### 4. Atom Economy

Table S4 - Calculation of the AE % for the synthesized products

| Entry                     | $\Sigma$ RMM starting materials<br>(g/mol)                                                                           | RMM product<br>(g/mol) | AE %                                                                            |
|---------------------------|----------------------------------------------------------------------------------------------------------------------|------------------------|---------------------------------------------------------------------------------|
|                           | RMM of dimedone +<br>RMM of benzaldehyde<br>+ RMM of 2-naphthol                                                      | RMM of product<br>4a   | $\frac{\text{RMM of product}}{\Sigma \text{RMM starting materials}} \times 100$ |
| <b>Model<br/>Reaction</b> |                                                                                                                      |                        |                                                                                 |
| <b>(4a)</b>               | Dimedone (140.180<br>g/mol) + benzaldehyde<br>(106.121 g/mol) + 2-<br>naphthol (144.170<br>g/mol) = 390.471<br>g/mol | 354.448 g/mol          | $\frac{354.448}{390.471} \times 100 = 90.77\%$                                  |
| <b>4b</b>                 | 362.404                                                                                                              | 326.395                | 91.18                                                                           |
| <b>4c</b>                 | 408.460                                                                                                              | 372.439                | 91.52                                                                           |
| <b>4d</b>                 | 424.920                                                                                                              | 388.894                | 92.16                                                                           |
| <b>4e</b>                 | 459.360                                                                                                              | 423.339                | 91.52                                                                           |
| <b>4f</b>                 | 424.920                                                                                                              | 388.894                | 91.73                                                                           |
| <b>4g</b>                 | 435.470                                                                                                              | 399.446                | 91.14                                                                           |
| <b>4h</b>                 | 406.473                                                                                                              | 370.448                | 93.44                                                                           |
| <b>4i</b>                 | 396.470                                                                                                              | 370.448                | 91.43                                                                           |
| <b>4j</b>                 | 420.500                                                                                                              | 384.475                | 91.35                                                                           |
| <b>4k</b>                 | 380.430                                                                                                              | 344.400                | 91.44                                                                           |
| <b>4l</b>                 | 415.480                                                                                                              | 379.916                | 91.09                                                                           |
| <b>4m</b>                 | 404.498                                                                                                              | 368.475                | 90.28                                                                           |
| <b>4n</b>                 | 370.484                                                                                                              | 334.458                | 90.63                                                                           |
| <b>4o</b>                 | 384.510                                                                                                              | 348.485                | 90.96                                                                           |
| <b>4p</b>                 | 398.540                                                                                                              | 362.512                | 90.77                                                                           |
| <b>4q</b>                 | 390.471                                                                                                              | 354.448                | 91.14                                                                           |
